# Supplementary material for: Systematic investigation of phthalocyanines, naphthalocyanines, and their aza-analogues. Effect of the isosteric aza-replacement in the core
Source: Royal Society of Chemistry journal article supplement (doi:10.1039/c5dt01863c), 2015-01-01
Supplement: c5dt01863c1.pdf [file c5dt01863c1.pdf]

*Electronic Supplementary Information*

Systematic investigation of phthalocyanines,  
naphthalocyanines, and their aza-analogues. Effect  
of the isosteric aza-replacement in the core.

*Veronika Novakova,\*<sup>a</sup> Petra Reimerova,<sup>a</sup> Jan Svec,<sup>b</sup> Daniel Suchan,<sup>b</sup> Miroslav Miletin,<sup>b</sup>*

*Hannah M. Rhoda,<sup>c</sup> Victor N. Nemykin,\*<sup>c</sup> and Petr Zimcik\*<sup>b</sup>*

<sup>a</sup>Department of Biophysics and Physical Chemistry, Faculty of Pharmacy in Hradec Kralove,  
Charles University in Prague, Heyrovskeho 1203, 50005, Hradec Kralove, Czech Republic,

[veronika.novakova@faf.cuni.cz](mailto:veronika.novakova@faf.cuni.cz)

<sup>b</sup>Department of Pharmaceutical Chemistry and Drug Control, Faculty of Pharmacy in Hradec  
Kralove, Charles University in Prague, Heyrovskeho 1203, 50005, Hradec Kralove, Czech

Republic, [zimcik@faf.cuni.cz](mailto:zimcik@faf.cuni.cz)

<sup>c</sup>Department of Chemistry & Biochemistry, University of Minnesota Duluth, 1039 University

Drive, Duluth, MN 55812, USA, [vnemykin@d.umn.edu](mailto:vnemykin@d.umn.edu),

## CONTENT

|                                                                                     |     |
|-------------------------------------------------------------------------------------|-----|
| Content .....                                                                       | S2  |
| General .....                                                                       | S3  |
| Synthesis of precursors.....                                                        | S3  |
| Alternative attempts to synthesis of compound <b>6</b> .....                        | S5  |
| Condensation of compound <b>7</b> and diiminosuccinonitrile. ....                   | S5  |
| Nucleophilic substitution of 6,7-dibromoquinoxaline-2,3-dicarbonitrile.....         | S5  |
| Synthesis of macrocycles .....                                                      | S6  |
| Synthetic protocols used for assessment of reactivity in cyclotetramerization. .... | S7  |
| NMR spectra.....                                                                    | S8  |
| Absorption spectra, MCD spectra .....                                               | S14 |
| solubility.....                                                                     | S14 |
| Aggregation .....                                                                   | S17 |
| Photophysical measurements .....                                                    | S18 |
| Photostability.....                                                                 | S19 |
| Electrochemistry and spectroelectrochemistry .....                                  | S21 |
| Theoretical calculations.....                                                       | S26 |
| DFT-PCM predicted frontier orbitals for target compounds.....                       | S29 |
| DFT-PCM predicted compositions for the frontier orbitals .....                      | S35 |
| Correlations between predicted and experimental data.....                           | S39 |
| TDDFT-PCM predicted and experimentally observed energies in target compounds.....   | S42 |
| Optimized geometries for target compounds .....                                     | S43 |
| References .....                                                                    | S98 |

## GENERAL

All of the organic solvents were of analytical grade. Anhydrous butanol was stored over magnesium butoxide and distilled prior to use. All chemicals for the syntheses were obtained from established suppliers (Aldrich, Acros, Merck, and TCI Europe) and were used as received. TLC was performed using Merck aluminum sheets with silica gel 60 F254. Merck Kieselgel 60 (0.040–0.063 mm) was used for column chromatography. A CEM Discover and Explorer 24 Automated Microwave Synthesis Workstation with a 24-position reaction deck (CEM Corporation, Matthews, North Carolina, USA) was used for the reactions under microwave irradiation. Reaction temperatures during microwave heating were controlled by external infrared sensor. Melting points were measured on an Electrothermal IA9200 Series Digital Melting Point apparatus. Infrared spectra were measured on a Nicolet 6700 (ATR mode).  $^1\text{H}$  and  $^{13}\text{C}$  NMR spectra were recorded on a Varian Mercury Vx BB 300 NMR or VNMR 500 spectrometers. The reported chemical shifts are given relative to  $\text{Si}(\text{CH}_3)_4$  and are referenced to the signal of the solvent. Elemental analysis was carried out using an Automatic Microanalyser EA1110CE. The UV/Vis spectra were recorded using a Shimadzu UV-2600 spectrophotometer. Matrix-assisted laser desorption ionization-time of flight (MALDI-TOF) mass spectra were recorded in the positive reflectron mode on an AB Sciex 4800 MALDI TOF/TOF mass spectrometer using *trans*-2-[3-(4-*tert*-butylphenyl)-2-methyl-2-propenylidene]malononitrile as the matrix. The instrument was calibrated externally with a five-point calibration using Peptide Calibration Mix 1 (LaserBio Labs, Sophia- Antipolis, France).

## SYNTHESIS OF PRECURSORS

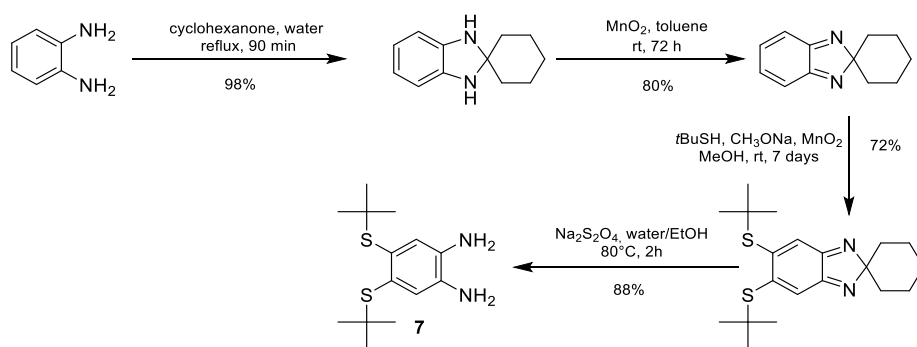

**Scheme S1.** Synthesis of compound 7.

*2H-benzimidazole-2-spirocyclohexane*. This compound was synthesized starting from benzene-1,2-diamine following the original two step procedure (Scheme S1) published by Garner *et al.*<sup>1</sup> with almost identical yield.

*5,6-Bis(tert-butylsulfanyl)-2H-benzimidazol-2-spirocyclohexane*. The procedure was adopted from lit.<sup>2</sup> but with small modifications that substantially increased the yield. Sodium methoxide (31.5 g, 583 mmol) was dissolved in anhydrous methanol (600 mL) and 2-methylpropane-2-thiol (52.6 g, 65.7 mL, 583 mmol) was added. Then, *2H-benzimidazole-2-spirocyclohexane* (10.9 g, 58.5 mmol) was added followed by  $\text{MnO}_2$  (50.4 g, 583 mmol) and the reaction was stirred for 7 days at rt. Then, the suspension was filtered, the solvent evaporated and water was

added. The mixture was washed three times with chloroform and the organic phase was collected and dried (Na<sub>2</sub>SO<sub>4</sub>). The product was purified by column chromatography on silica with toluene/acetone 30:1 (R<sub>f</sub> = 0.25) to yield yellow solid (15.3 g, 72 %). <sup>1</sup>H NMR (300 MHz, CDCl<sub>3</sub>): δ 7.34 (s, 2H), 2.02-1.88 (m, 4H), 1.81-1.60 (m, 6H), 1.51 (s, 18H) ppm. <sup>13</sup>C NMR (75 MHz, CDCl<sub>3</sub>): δ 157.5, 134.3, 126.0, 107.1, 48.6, 33.2, 30.6, 25.5, 24.7 ppm. The analytical data corresponded well with those published for this compound earlier.<sup>2</sup>

**Synthesis of 4,5-bis(*tert*-butylsulfanyl)benzene-1,2-diamine (7).** The procedure was adopted from the literature<sup>3</sup> with minor modifications. Sodium dithionite (contains 85 % of the material, 23.7 g, 0.116 mol) was dissolved in water (240 mL) and mixed with a solution of 5,6-bis(*tert*-butylsulfanyl)-2*H*-benzimidazol-2-spirocyclohexane (7.0 g, 19 mmol) in ethanol (240 mL). The reaction mixture was heated at 80°C for 2 h, and then, the ethanol was evaporated under reduced pressure. The aqueous phase was washed three times with ethyl acetate, and the organic layer was dried (Na<sub>2</sub>SO<sub>4</sub>). The crude product was purified by column chromatography on silica with ethyl acetate/hexane (2:1) to obtain an off-white solid (4.83 g, 88 %). M.p. 158.3-159.1°C (lit.<sup>3</sup> 159.5-160.5°C). <sup>1</sup>H NMR (300 MHz, CDCl<sub>3</sub>): δ 7.06 (s, 2H), 3.50 (s, 4H), 1.24 (s, 18H) ppm. <sup>13</sup>C NMR (75 MHz, CDCl<sub>3</sub>): δ 134.8, 130.5, 126.8, 47.1, 31.0 ppm. IR (ATR): ν 3417, 3330, 3236, 2974, 2959, 2922, 2898, 2863, 1615, 1561, 1479, 1391, 1362, 1280, 1221, 1166, 966, 889 cm<sup>-1</sup>. The analytical data corresponded well with those published for this compound previously.<sup>3</sup>

**Synthesis of 6,7-bis(*tert*-butylsulfanyl)-1,4-dihydroquinoxaline-2,3-dione (8).** Compound 7 (4.8 g, 16.9 mmol) was dissolved in diethyloxalate (100 mL) at 160°C. The product that precipitated from the reaction after several minutes was dissolved by the addition of ethanol (40 mL), and the reaction ran with a reflux condenser for the next 2.5 h at the same temperature. Then, the ethanol was distilled off by removing the condenser, and the reaction was cooled overnight in the freezer. The precipitated product 8 was collected, and the residue that remained in the solvent was purified by column chromatography on silica with ethyl acetate/acetic acid (20:1) as an eluent. Both fractions were combined to obtain a light brown solid (5.0 g, 88 %). The sample was sufficiently pure for the subsequent reactions. The analytical sample was crystallized twice from EtOH/water to obtain light yellow crystals. M.p. dec. from 324°C. <sup>1</sup>H NMR (300 MHz, CD<sub>3</sub>SOCD<sub>3</sub>): δ 11.93 (s, 2H), 7.45 (s, 2H), 1.23 (s, 18H) ppm. <sup>13</sup>C NMR (75 MHz, CD<sub>3</sub>SOCD<sub>3</sub>): δ 155.1, 132.8, 126.0, 123.8, 47.5, 30.9 ppm. IR (ATR): ν 3172, 3058, 2962, 2921, 1696, 1607, 1474, 1456, 1439, 1392, 1363, 1274, 1163, 1106, 990 cm<sup>-1</sup>. Calcd. for C<sub>16</sub>H<sub>22</sub>N<sub>2</sub>O<sub>2</sub>S<sub>2</sub>: C 56.77, H 6.55, N 8.28; found: C 56.80, H 6.63, N 8.24 %.

**Synthesis of 6,7-bis(*tert*-butylsulfanyl)-2,3-dichloroquinoxaline (9).** Compound 8 (3.9 g, 11.5 mmol) was dissolved in THF (300 mL). SOCl<sub>2</sub> (8.52 mL, 120 mmol) and DMF (0.85 mL, 11 mmol) were added, and the mixture was heated at reflux for 3 h. Then, the solvents were removed, and the solid was washed with water, dried and purified by column chromatography on silica with toluene/hexane (1:1) as an eluent to obtain a yellow solid (3.35 g, 77 %). M.p. 133.4-134.5°C. <sup>1</sup>H NMR (300 MHz, CDCl<sub>3</sub>): δ 8.15 (s, 2H), 1.48 (s, 18H) ppm. <sup>13</sup>C NMR (75 MHz, CDCl<sub>3</sub>): δ 145.3, 144.0, 139.0, 131.7, 48.6, 30.9 ppm. IR (ATR): ν 2965, 2924, 1582, 1438, 1396, 1362, 1253, 1203, 1140, 1076, 1001, 977, 901, 866 cm<sup>-1</sup>. Calcd. for C<sub>16</sub>H<sub>20</sub>Cl<sub>2</sub>N<sub>2</sub>S<sub>2</sub>: C 51.19, H 5.37, N 7.46; found: C 51.16, H 5.46, N 7.27 %.

## ALTERNATIVE ATTEMPTS TO SYNTHESIS OF COMPOUND 6

### Condensation of compound 7 and diiminosuccinonitrile.

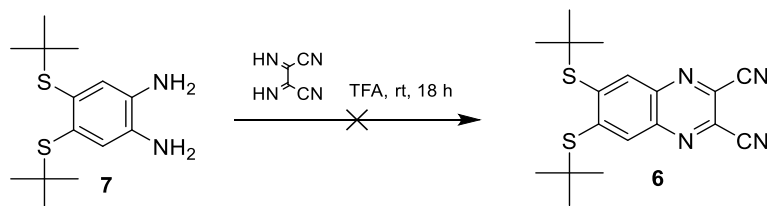

**Scheme S2.** Alternative attempt to synthesize compound 6 directly from 7.

This attempt (Scheme S2) was based on known formation of quinoxaline-2,3-dicarbonitriles by reaction of different benzene-1,2-diamines with diiminosuccinonitrile.<sup>4</sup> Compound 7 (60 mg, 0.16 mmol) was homogenized with diiminosuccinonitrile<sup>5</sup> (30 mg, 0.28 mmol) and transferred into the round-bottom flask with trifluoroacetic acid (TFA, 5 mL) that was subsequently filled with argon. The reaction ran at rt for 18 h and then was poured to water. TLC analysis of the precipitate did not show any product with expected  $R_f$  in chloroform or toluene as mobile phases.

### Nucleophilic substitution of 6,7-dibromoquinoxaline-2,3-dicarbonitrile.

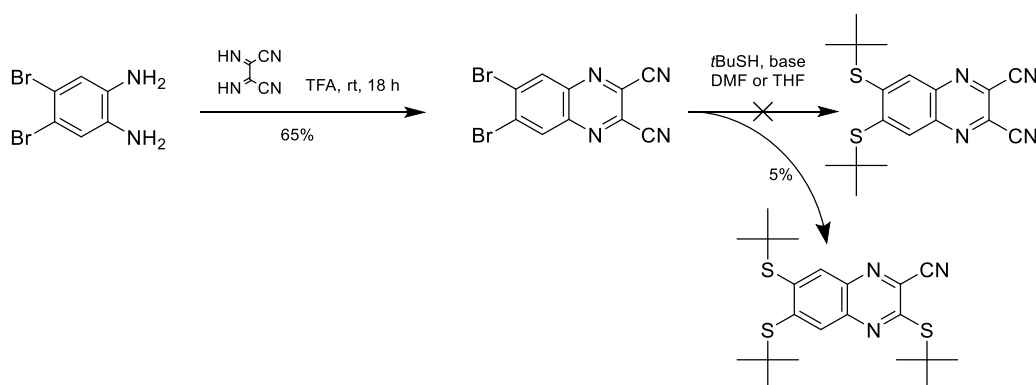

**Scheme S3.** Alternative attempt to synthesize compound 6 based on nucleophilic substitution in 6,7-dibromoquinoxaline-2,3-dicarbonitrile.

*6,7-Dibromoquinoxaline-2,3-dicarbonitrile.* 4,5-Dibromobenzene-1,2-diamine<sup>6</sup> (1.68 g, 6.3 mmol) was homogenized with diiminosuccinonitrile<sup>5</sup> (1.00 g, 9.4 mmol) and transferred into the round-bottom flask with TFA (30 mL) that was subsequently filled with argon. The reaction ran at rt for 18 h and then was poured to water. The precipitate was collected, washed with water and purified by column chromatography on silica with toluene to obtain light yellow solid (1.4 g, 65 %). M.p. 300-303°C (dec.). <sup>1</sup>H NMR (300 MHz, CD<sub>3</sub>SOCD<sub>3</sub>):  $\delta$  8.85 (s) ppm. <sup>13</sup>C NMR (75 MHz, CD<sub>3</sub>SOCD<sub>3</sub>):  $\delta$  139.7, 133.6, 132.7, 132.0, 114.5 ppm.

*Nucleophilic substitution of 6,7-dibromoquinoxaline-2,3-dicarbonitrile* (Scheme S3). 6,7-Dibromoquinoxaline-2,3-dicarbonitrile (0.1 g, 0.296 mmol) was dissolved in DMF and 2-methylpropane-2-thiol (66  $\mu$ L, 0.585 mmol) was added. Anhydrous K<sub>2</sub>CO<sub>3</sub> (0.12 g, 0.868 mmol) was subsequently added. The reaction was stirred at rt for 1 hour, then poured into a water and washed three times with chloroform. The TLC (toluene) of the organic layer indicated

large number of products. The most intense spot was isolated by column chromatography on silica (toluene) and a yellow product was obtained (5 mg, 5 %). The product was characterized to be 3,6,7-tris(*tert*-butylsulfanyl)quinoxaline-2-carbonitrile. <sup>1</sup>H NMR (500 MHz, CDCl<sub>3</sub>): δ 8.18 (s, 1 H), 8.08 (s, 1 H), 1.74 (s, 9H), 1.54 (s, 9H), 1.48 (s, 9H) ppm. <sup>13</sup>C NMR (125 MHz, CDCl<sub>3</sub>): δ 30.1, 30.9, 31.0, 48.5, 48.8, 50.9, 114.8, 128.8, 130.2, 135.0, 136.8, 140.3, 140.9, 148.1, 158.5 ppm.

## SYNTHESIS OF MACROCYCLES

**Synthesis of 2,3,9,10,16,17,23,24-octakis(*tert*-butylsulfanyl)tetrapyrazinoporphyrazinato zinc(II) (TPyzPz).** Compound **1** (100 mg, 0.33 mmol) and anhydrous Zn(CH<sub>3</sub>COO)<sub>2</sub> (61 mg, 0.33 mmol) were weighed in a flask that was subsequently filled with argon. Anhydrous pyridine (1 mL) was added, and the mixture was heated at reflux for 12 h. Pyridine was evaporated, and a mixture of water/methanol/acetic acid (10:10:1) (100 mL) was added. The precipitate was collected, washed with the same mixture, water, and methanol and then air-dried. The solid was extracted using chloroform, filtered, evaporated and purified by column chromatography on silica with toluene/chloroform/THF (20:10:1) as an eluent. The pure fractions were evaporated, and the solid was washed with methanol to obtain a green solid (64 mg, 63 %). <sup>1</sup>H NMR (300 MHz, CDCl<sub>3</sub>/C<sub>6</sub>D<sub>5</sub>N 3:1): δ 2.24 (s, 72H) ppm. <sup>13</sup>C NMR (75 MHz, CDCl<sub>3</sub>/C<sub>6</sub>D<sub>5</sub>N 3:1): δ 158.5, 151.5, 144.5, 51.5, 30.8 ppm. The analytical data corresponded well with those published for this compound prepared by an alternative procedure.<sup>7</sup>

**Synthesis of 2,3,9,10,16,17,23,24-octakis(*tert*-butylsulfanyl)phthalocyaninato zinc(II) (Pc).** The same procedure that was used to synthesize **TPyzPz** was used to synthesize **Pc** but starting from compound **4** (100 mg, 0.33 mmol). Yield: 54 mg (51 %). <sup>1</sup>H NMR (300 MHz, CDCl<sub>3</sub>/C<sub>6</sub>D<sub>5</sub>N 3:1): δ 9.91 (s, 8H), 1.78 (s, 72H) ppm. <sup>13</sup>C NMR (75 MHz, CDCl<sub>3</sub>/C<sub>6</sub>D<sub>5</sub>N 3:1): δ 154.2, 141.7, 137.7, 130.8, 48.9, 31.7 ppm. The analytical data corresponded well with those published for this compound prepared by an alternative procedure.<sup>7</sup>

**Synthesis of 2,3,11,12,20,21,29,30-octakis(*tert*-butylsulfanyl)tetra[6,7]quinoxalinoporphyrazinato zinc(II) (6,7-TQPz).** Compound **3** (100 mg, 0.28 mmol) and anhydrous Zn(CH<sub>3</sub>COO)<sub>2</sub> (51 mg, 0.28 mmol), were weighed into a flask that was subsequently filled with argon. Anhydrous pyridine (1 mL) was added, and the mixture was heated at reflux for 12 h. The reaction mixture was poured into water/methanol/acetic acid (10:1:1 mixture, 100 mL) and stirred for 30 min. The precipitate was collected, washed with water, methanol, and acetone and air dried. The crude product was adsorbed to silica (0.5 g) and washed with methanol until the passing solution was colorless. Then, the silica was dried carefully, and the product was further purified by column chromatography on silica with toluene/pyridine (20:1) as an eluent. After the evaporation of the pure fractions from chromatography, the solid was washed thoroughly with acetone to obtain a dark green solid (45 mg, 43 %). <sup>1</sup>H NMR (300 MHz, CDCl<sub>3</sub>/C<sub>6</sub>D<sub>5</sub>N 3:1): δ 9.66 (s, 8H), 2.06 (s, 72H) ppm. <sup>13</sup>C NMR (75 MHz, CDCl<sub>3</sub>/C<sub>6</sub>D<sub>5</sub>N 3:1): δ 156.8, 153.3, 139.2, 136.9, 121.4, 50.5, 30.6 ppm. The

analytical data corresponded well with those published for this compound prepared by an alternative procedure.<sup>8</sup>

## SYNTHETIC PROTOCOLS USED FOR ASSESSMENT OF REACTIVITY IN CYCLOTETRAMERIZATION.

**Reaction with lithium butoxide.** Corresponding starting material, aromatic dicyanitrile (0.33 mmol) was dissolved in anhydrous butanol (2 mL) freshly distilled from magnesium and heated to reflux. A piece of metal lithium (0.33 mmol) was put inside through the condenser and the reflux continued for next 3 h. Afterwards, anhydrous  $\text{Zn}(\text{CH}_3\text{COO})_2$  (303 mg, 1.65 mmol) was added and the mixture was heated at reflux for 1 h. The reaction was cooled down to rt and poured into a mixture of water/methanol/acetic acid 10:10:1 (100 mL). The precipitate was collected, washed with the same mixture of solvents, water and air-dried. The purification followed the procedures mentioned for particular compound in the manuscript or ESI.

**Reaction with magnesium butoxide.** Magnesium (55 mg, 2.30 mmol) was added to anhydrous butanol (2 mL) freshly distilled from magnesium and heated to reflux with a small crystal of iodine. Magnesium butoxide formed after 2 h and starting material, aromatic dicyanitrile (0.33 mmol), was added. The reaction was heated to reflux for 12 h, cooled down to rt and poured into a mixture of water/methanol/acetic acid 10:10:1 (100 mL). The precipitate was collected, washed with the same mixture, water and air-dried. The solid was extracted using chloroform, filtered, evaporated and dissolved in chloroform (50 mL). *p*-Toluenesulfonic acid (156 mg, 0.82 mmol) dissolved in THF (20 mL) was added and the mixture was stirred at rt for 2 h. After evaporation of the solvents, the metal-free derivative was washed with water and air-dried. All product was subsequently dissolved in pyridine (25 mL), anhydrous  $\text{Zn}(\text{CH}_3\text{COO})_2$  (151 mg, 0.82 mmol) was added and the mixture was heated at reflux for 1 h. Pyridine was evaporated and a mixture of water/methanol/acetic acid 10:10:1 (100 mL) was added. The purification followed the procedures mentioned for particular compound in the manuscript or ESI.

**Reaction with zinc acetate in pyridine.** Starting materials, aromatic dicyanitrile (0.33 mmol) and anhydrous  $\text{Zn}(\text{CH}_3\text{COO})_2$  (61 mg, 0.33 mmol), were weighted into the flask that was subsequently filled with argon. Anhydrous pyridine (1 mL) was added and the mixture was heated to reflux for 12 h. Pyridine was evaporated and a mixture of water/methanol/acetic acid 10:10:1 (100 mL) was added. The purification followed the procedures mentioned for particular compound in the manuscript or ESI. Alternatively, the reaction was performed also under microwave irradiation in a closed vessel with the same amounts of reactants, reaction time 12 h and temperature 170 °C.

**Reaction with zinc acetate in DMF.** The same procedure as above (*Reaction with zinc acetate in pyridine*) was used but with refluxing anhydrous DMF (1 mL).

## NMR SPECTRA

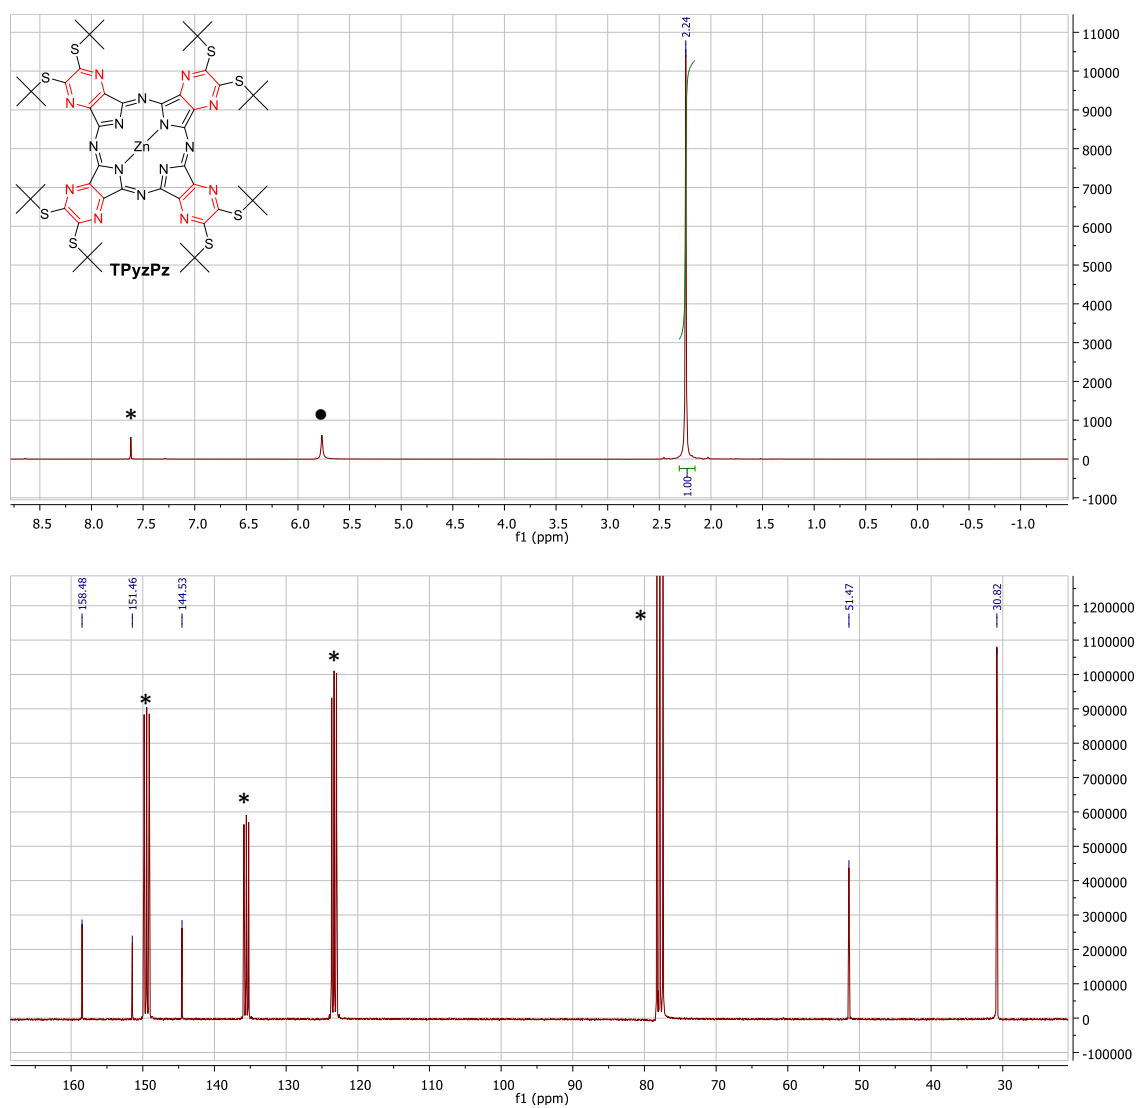

**Figure S1.**  $^1\text{H}$  (300 MHz) and  $^{13}\text{C}$  NMR (75 MHz) spectra of TPyzPz in CDCl<sub>3</sub>/C<sub>6</sub>D<sub>5</sub>N 3:1. Asterisk indicates solvent signal, dot indicates signal of water.



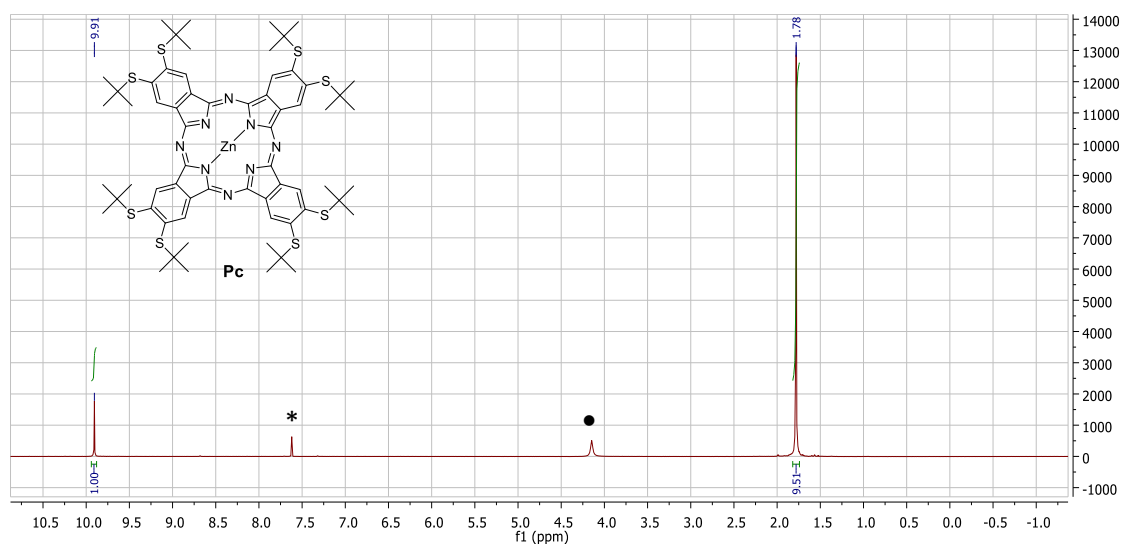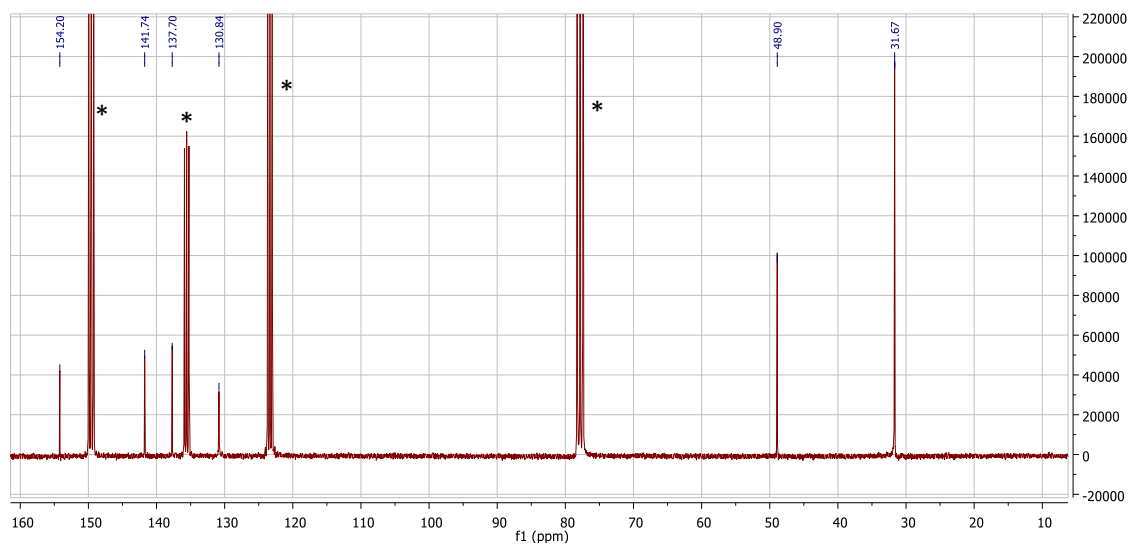

**Figure S2.**  $^1\text{H}$  (300 MHz) and  $^{13}\text{C}$  NMR (75 MHz) spectra of **Pc** in  $\text{CDCl}_3/\text{C}_6\text{D}_5\text{N}$  3:1. Asterisk indicates solvent signal, dot indicates signal of water.

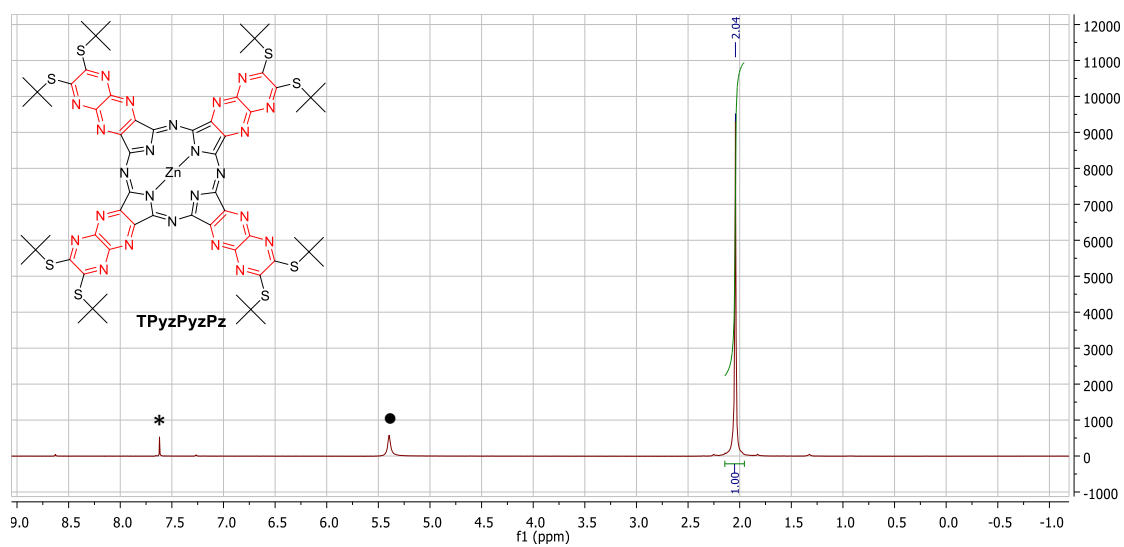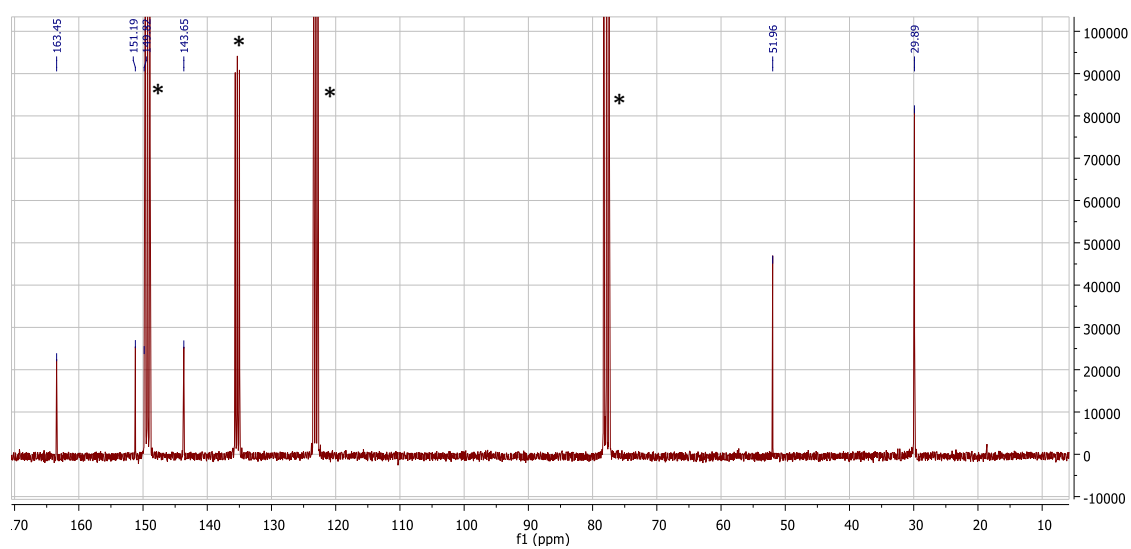

**Figure S3.**  $^1\text{H}$  (300 MHz) and  $^{13}\text{C}$  NMR (75 MHz) spectra of TPyzPyzPz in  $\text{CDCl}_3/\text{C}_6\text{D}_5\text{N}$  3:1. Asterisk indicates solvent signal, dot indicates signal of water.

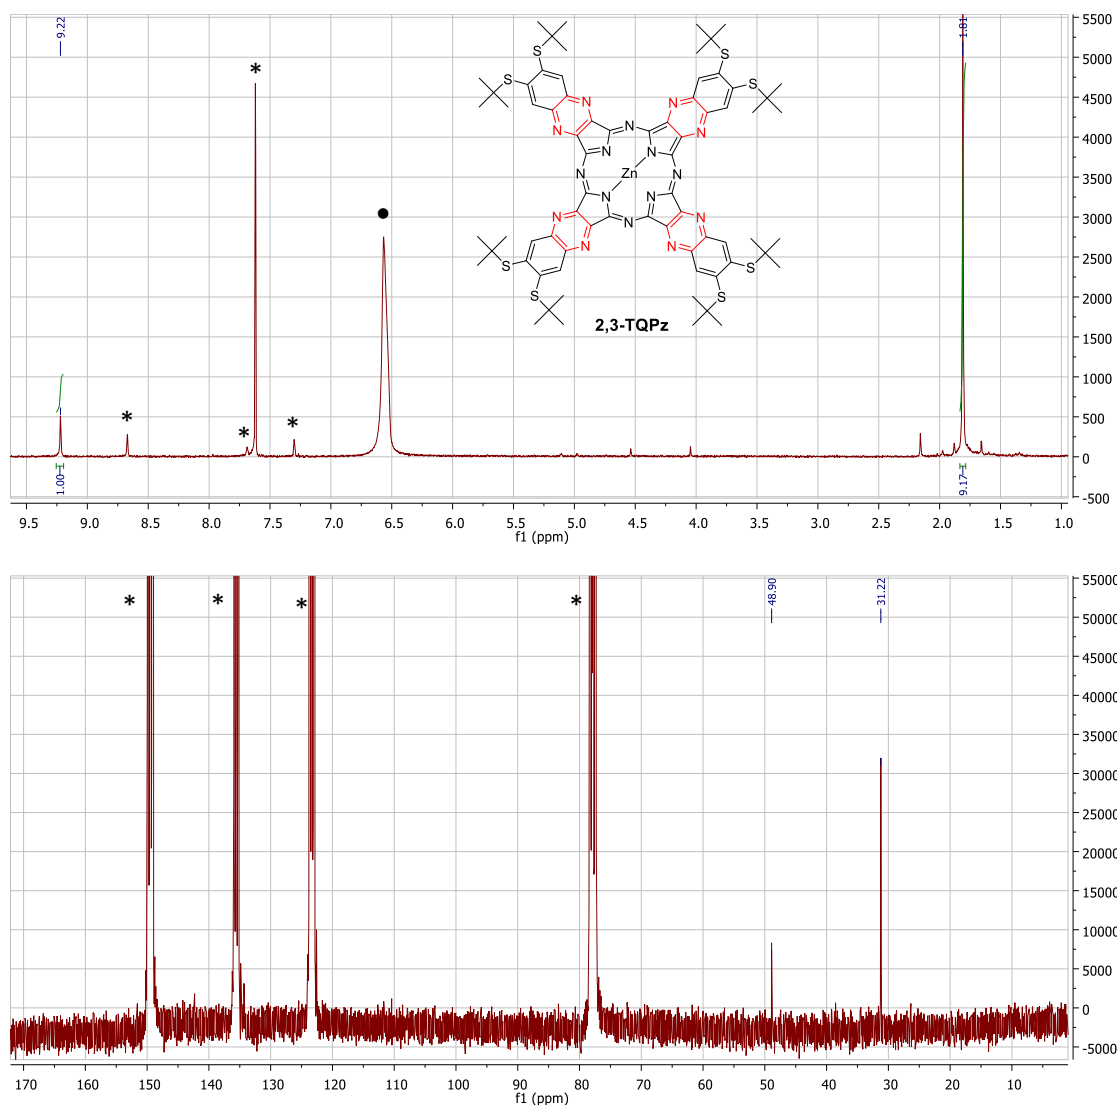

**Figure S4.**  $^1\text{H}$  (300 MHz) and  $^{13}\text{C}$  NMR (75 MHz) spectra of **2,3-TQPz** in  $\text{CDCl}_3/\text{C}_6\text{D}_5\text{N}$  3:1. Asterisk indicates solvent signal, dot indicates signal of water.

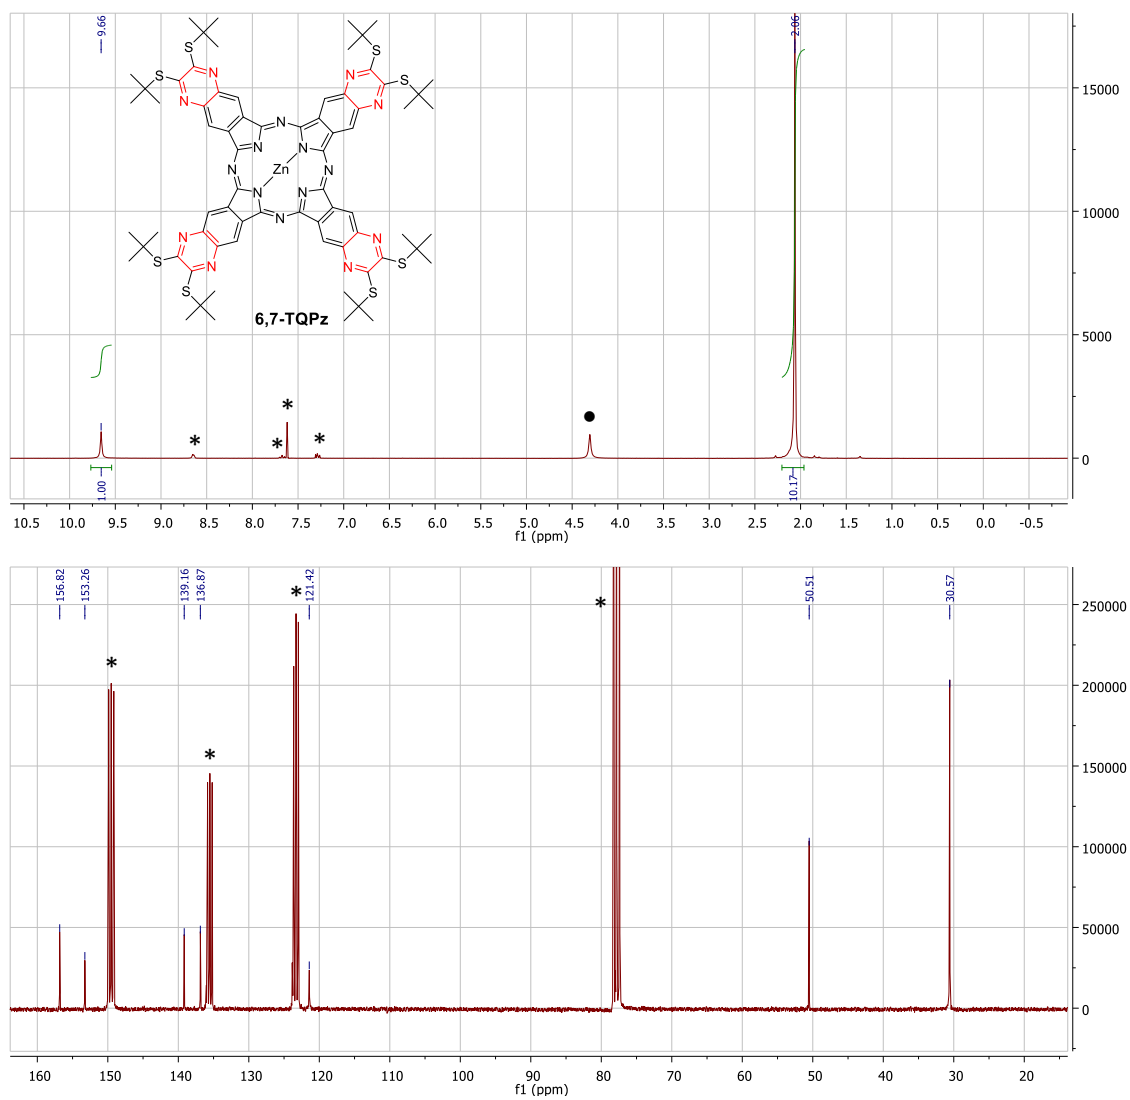

**Figure S5.** <sup>1</sup>H (300 MHz) and <sup>13</sup>C NMR (75 MHz) spectra of **6,7-TQPz** in CDCl<sub>3</sub>/C<sub>6</sub>D<sub>5</sub>N 3:1. Asterisk indicates solvent signal, dot indicates signal of water.

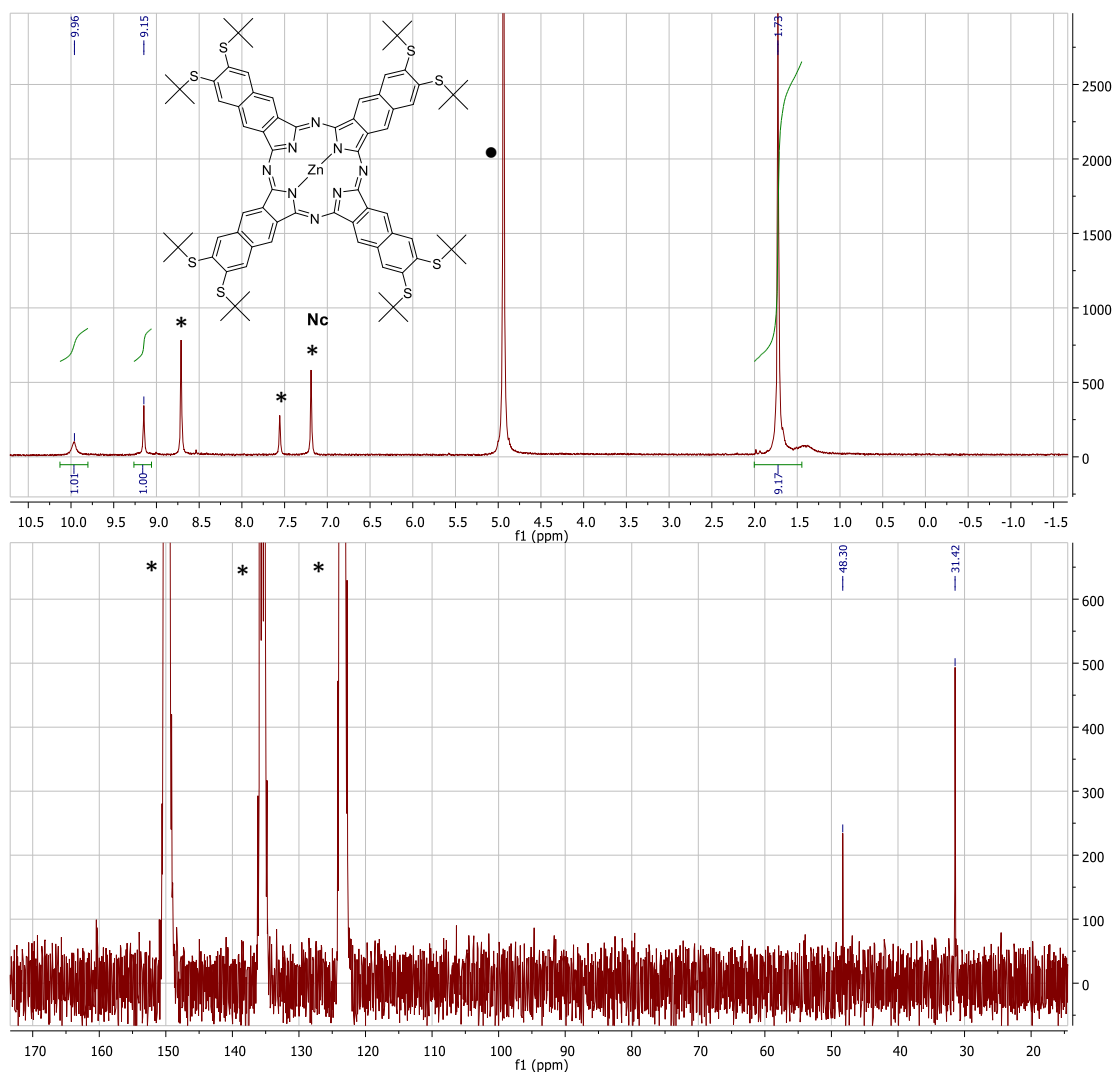

**Figure S6.**  $^1\text{H}$  (300 MHz) and  $^{13}\text{C}$  NMR (75 MHz) spectra of **Nc** in  $\text{C}_6\text{D}_5\text{N}$ . Asterisk indicates solvent signal, dot indicates signal of water.

## ABSORPTION SPECTRA, MCD SPECTRA

UV-vis-NIR data were obtained on a Jasco V-670 or Shimadzu UV-2600 spectrophotometer. Magnetic circular dichroism (MCD) data were recorded using an OLIS DCM 17 CD spectropolarimeter using a permanent 1.4 T DeSa magnet. The spectra were recorded twice for each sample, first with a parallel field and then with an antiparallel field. Their intensities were expressed by molar ellipticity per T.

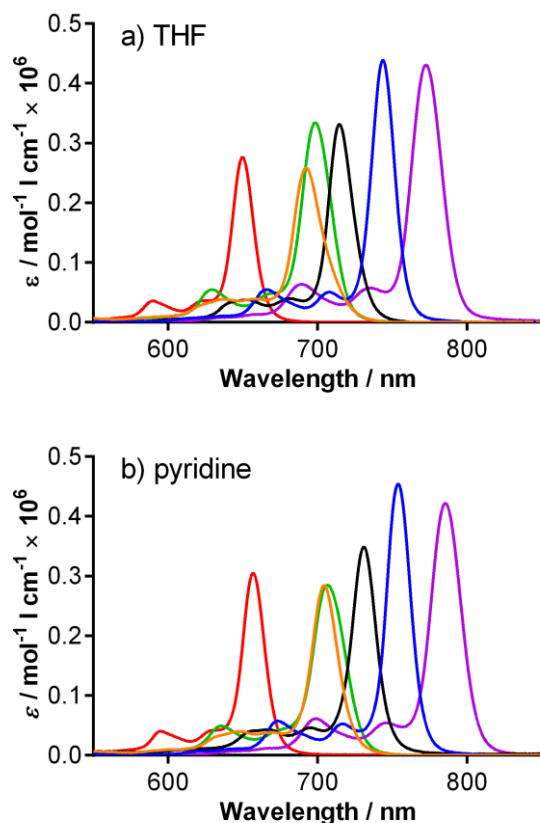

**Figure S7.** Absorption spectra of TPzPz (red), TPzPyzPz (orange), Pc (green), 2,3-TQPz (black), 6,7-TQPz (blue) and Nc (magenta) in THF (a) and pyridine (b).

## SOLUBILITY

*Experimental:* A sample (approximately 5 mg) was suspended in the solvent (typically 1-2 mL) at room temperature to obtain a concentrated solution with an undissolved portion of solid. This suspension was stirred for 5 h, sonicated for 10 min and stirred for another 12 h at room temperature. The supernatant was collected and centrifuged (16,800 g, 21°C, 15 min), and the supernatant was collected again. The centrifugation was repeated (at least once more) to obtain a homogenous solution without the remaining undissolved solid. The solution (10  $\mu\text{L}$ ) was diluted in pyridine to obtain a concentration in a range of 0.5-1.5  $\mu\text{M}$ , and the absorption spectra were measured. Pyridine was chosen to ensure the monomeric character of the studied compounds. Concentration ( $c$ ) of a saturated solution was calculated using Eq. S1:

$$c = \frac{A}{\varepsilon} \times dilution \quad (\text{Eq. S1})$$

where  $A$  is absorbance of the solution and  $\varepsilon$  is the extinction coefficient in pyridine. The data presented are the means of three independent experiments.

*Discussion:* In general, unsubstituted Pcs and their derivatives are known for low solubility in organic solvents that is usually improved by peripheral substitution. First, solubility of two representative compounds was studied in solvents of different polarity. The solubility increased with less polar character of the solvent due to the hydrophobic nature of both **TPyzPz** and **Pc**, as is clear from Figure S8 and Table S1. The unusually high solubility of **Pc** in pyridine that does not fit to the observed polarity dependence can be explained by the strong coordinating character of this solvent. Coordination apparently broke the intermolecular forces and increased the solubility. Interestingly, unsubstituted ZnPc was reported to dissolved well in rather more polar coordinating solvents DMAC, DMSO, THF (<1 mmol kg<sup>-1</sup>), NMP (6.9 mmol kg<sup>-1</sup>) while being insoluble in benzene or toluene.<sup>9</sup> Apparently, the coordination character plays much more important role in solubility of flat unsubstituted ZnPc. In case of Pcs substituted with bulky substituents that are the primary cause of decreased self-association in the solid state, the solubility follows rather the hydrophilic/phobic nature of the macrocycle and the solvent.

**Table S1.** Solubility (mM) of **Pc** and **TPyzPz** in different solvents.<sup>a</sup>

| Solvent     | <b>Pc</b>     | <b>TPyzPz</b> | Polarity index |
|-------------|---------------|---------------|----------------|
| toluene     | 4.38 (± 0.10) | 4.74 (± 0.09) | 2.4            |
| benzene     | 4.31 (± 0.14) | 2.15 (± 0.21) | 2.7            |
| THF         | 1.11 (± 0.03) | 0.54 (± 0.04) | 4              |
| 1,4-dioxane | 0.51 (± 0.01) | 0.74 (± 0.02) | 4.8            |
| acetone     | 0.06 (± 0.01) | 0.17 (± 0.02) | 5.1            |
| pyridine    | 2.91 (± 0.08) | 0.72 (± 0.02) | 5.3            |
| DMF         | 0.51 (± 0.01) | 0.10 (± 0.02) | 6.4            |

<sup>a</sup>Expressed as mean (± standard deviation) of three measurements.

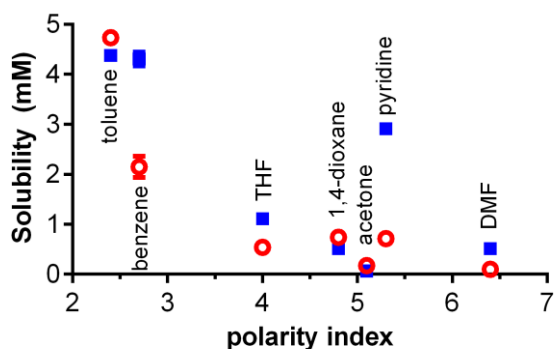

**Figure S8.** Solubility of **TPyzPz** (red dot) and **Pc** (blue square) in different solvents. Mean ( $\pm$  standard deviation) of three independent measurements.

Based on the above-mentioned observations, toluene was selected as the solvent for solubility determination of the whole series of studied compounds, because it assured high solubility. It is also a non-coordinating solvent that did not influence solubility by different levels of coordination. The results are summarized in Table S2. Unexpectedly, **2,3-TQPz** was found to be fully insoluble in toluene. For this reason, its solubility was determined also in the coordinating solvents THF and pyridine (Table S2). However, even in these solvents the solubility of **2,3-TQPz** was of several orders of magnitude lower than for **Pc** or **TPyzPz** in the same solvents (compare with data in Table S1). Two important facts can be revealed from data in Table S2, when omitting **2,3-TQPz**: a) enlarged macrocycles suffer from much lower solubility in comparison with lower homologues, and b) aza-replacement increases the solubility. The latter fact was well documented, particularly for enlarged macrocycles **6,7-TQPz** and **TPyzPz** with a comparable solubility ( $\sim 2.5$  mM) that exceeds that of **Nc** (0.1 mM) by more than 1 order of magnitude. The differences were less pronounced between **Pc** and **TPyzPz** (both  $\sim 4.5$  mM) that, in general, behaved very similarly (Figure S8, Table S2). The first fact is supported by similarly decreasing solubility after enlargement of the macrocycle system for magnesium complexes of octapyridinated porphyrine, **TPyzPz** and **6,7-TQPz** where the highest solubility is reported to be in order of  $\sim 10^{-3}$ ,  $\sim 10^{-4}$  and  $\sim 10^{-5}$  M, respectively.<sup>10</sup>

**Table S2.** Solubility of the studied compounds in toluene.

| Compound        | Solubility (mM) | Solubility (mg mL <sup>-1</sup> ) |
|-----------------|-----------------|-----------------------------------|
| <b>Nc</b>       | 0.10            | 0.15                              |
| <b>6,7-TQPz</b> | 2.16            | 3.21                              |
| <b>TPyzPz</b>   | 2.44            | 3.65                              |
| <b>2,3-TQPz</b> | <sup>a</sup>    | -                                 |
| <b>Pc</b>       | 4.38            | 5.62                              |
| <b>TPyzPz</b>   | 4.74            | 6.10                              |

<sup>a</sup>insoluble in toluene, solubility of **2,3-TQPz** in THF: 2.8  $\mu$ M, in pyridine: 130  $\mu$ M.



## AGGREGATION

The solution (100  $\mu\text{M}$ ) of the appropriate compound in toluene was prepared and absorption spectrum was measured (Figure S9). The solution was then diluted twice with toluene and absorption spectrum was taken again. The diluting procedure was repeated several times until the signal of absorption spectra was detectable (usually up to 0.2  $\mu\text{M}$ ). Absorption spectra of more concentrated solutions were taken using quartz optical cell with 1 mm pathlength while samples of lower concentrations using quartz optical cell with 10 mm pathlength. Dimerization constant ( $K_D$ ) was estimated (where possible) from dependence of  $\epsilon$  on concentration (Figure S9 insets) using nonlinear regression in Prism 6 for Windows (v 6.04, GraphPad Software, Inc.).

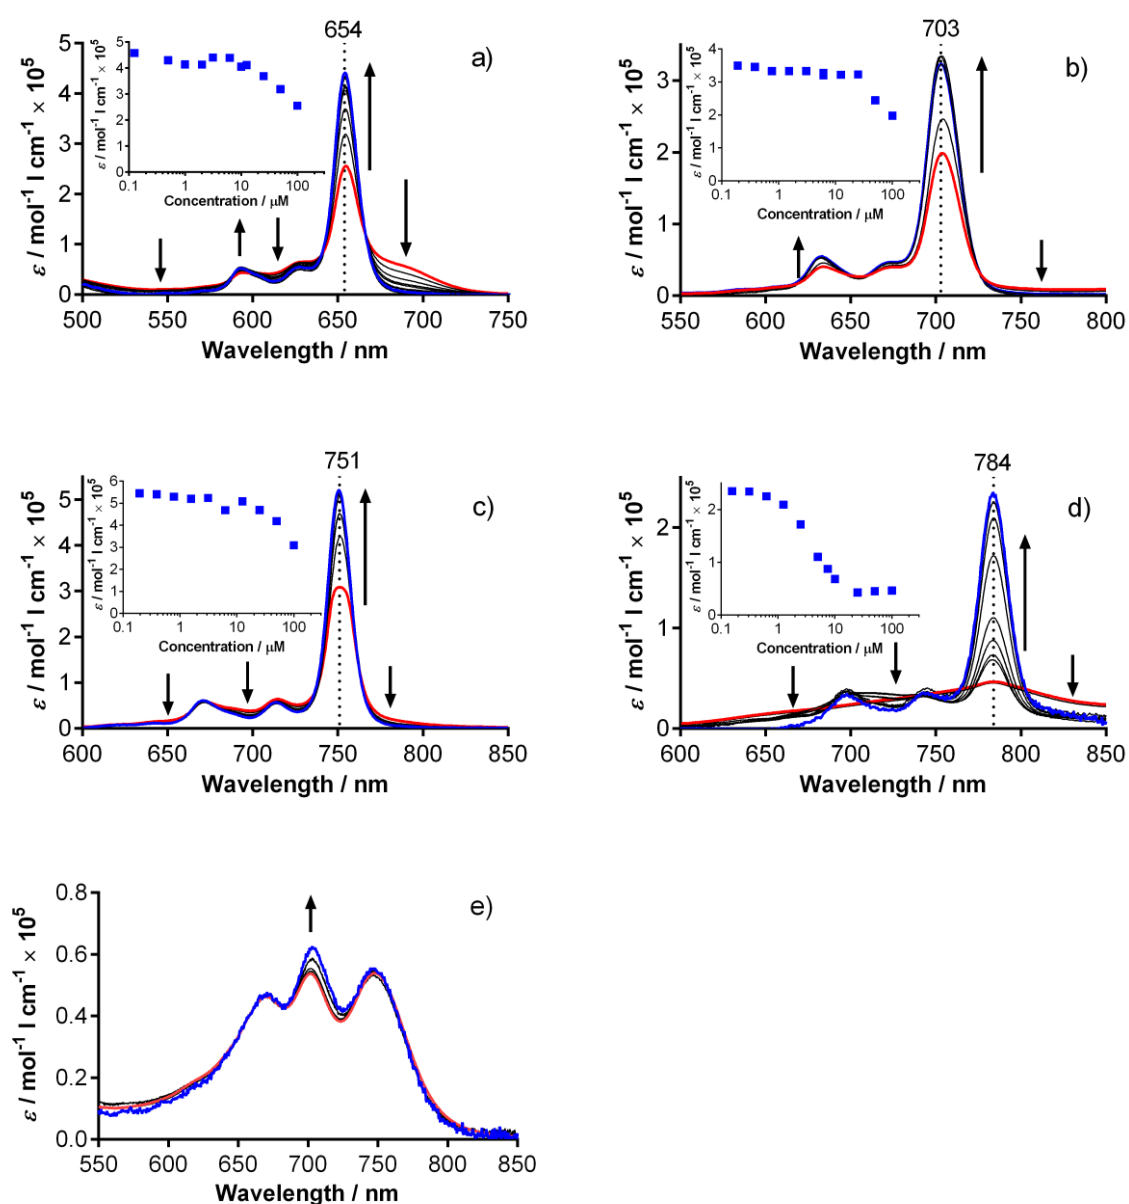

**Figure S9.** Changes in absorption spectra of studied compounds (**TPyzPz** (a), **Pc** (b), **6,7-TQPz** (c), **Nc** (d), **TPyzPzPz** (e)) in toluene with dilution from 100  $\mu\text{M}$  (red spectrum) to approximately 0.2  $\mu\text{M}$  (blue spectrum). Insets: dependence of  $\epsilon$  at Q-band maximum (dotted line in spectra) on concentration.

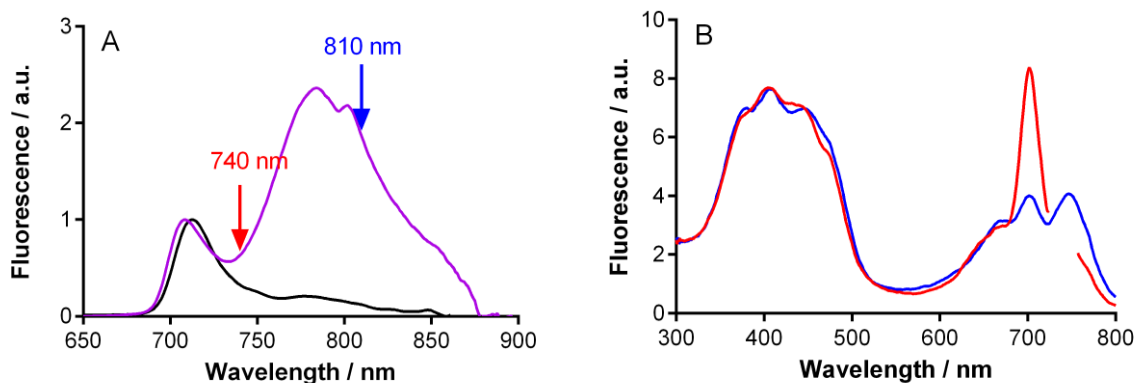

**Figure S10.** A) Normalized emission spectra ( $\lambda_{\text{exc}} = 410$  nm) of **TPyzPyzPz** in toluene (magenta) and pyridine (black) The spectra were normalized to the same fluorescence intensity of monomeric species. B) Excitation spectra of **TPyzPyzPz** in toluene with  $\lambda_{\text{em}} = 810$  nm (blue, major contribution from J-dimer) and  $\lambda_{\text{em}} = 740$  nm (red, more contribution from monomer). The excitation spectra were normalized to the same signal intensity in B-band. The part of the red excitation spectrum corresponding to scattered light ( $\lambda_{\text{em}} = 740$  nm) was removed.

## PHOTOPHYSICAL MEASUREMENTS

All samples were re-purified using preparative TLC for the photophysical measurements (both  $\Phi_{\text{F}}$  and  $\Phi_{\Delta}$ ) to ensure that they were highly pure. The fluorescence spectra were obtained using an AMINCO Bowman Series 2 luminescence spectrometer. All emission spectra were corrected for the instrument response. The fluorescence quantum yields ( $\Phi_{\text{F}}$ ) were determined in THF or pyridine *via* the comparative method<sup>11</sup> using unsubstituted zinc phthalocyanine (ZnPc, Sigma-Aldrich) as a reference ( $\Phi_{\text{F}} = 0.32$  in THF<sup>12</sup>,  $\Phi_{\text{F}} = 0.28$  in pyridine<sup>12</sup>). Both the reference and sample were excited at 370 nm. The absorbance at the excitation wavelength was held below 0.015, and the absorbance at the Q-band maximum was held below 0.05 to limit the inner filter effect. All experiments were performed in triplicate with the data representing the mean (estimated error  $\pm 15$  %).

The quantum yields of the singlet oxygen ( $\Phi_{\Delta}$ ) were determined in THF or pyridine according to a previously published procedure<sup>11</sup> using the decomposition of a chemical trap 1,3-diphenylisobenzofuran (DPBF) with ZnPc as a reference ( $\Phi_{\Delta} = 0.53$  in THF<sup>13</sup>,  $\Phi_{\Delta} = 0.61$  in pyridine<sup>14</sup>). All experiments were performed in triplicate, and the data presented herein represent the mean of the three experiments (estimated error:  $\pm 10$  %).

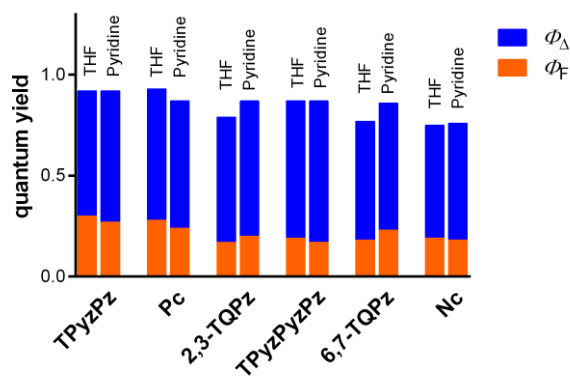

**Figure S11.** Quantum yields of fluorescence and singlet oxygen of studied compounds in THF and pyridine.

## PHOTOSTABILITY

The 2.5 mL of solution of the corresponding dye in pyridine ( $c \cong 2 \mu\text{M}$ ) was stirred at rt and irradiated in 10 mm  $\times$  10 mm quartz cell for total time of 30 minutes using a halogen lamp (EMOS, 400 W). In case when the photodecomposition was too slow, the irradiation continued for longer time to see the progress in spectra. Absorption spectra were collected typically in 5 min periods. Incident light was filtered through a water filter (6 cm) to remove heat. A decomposition of a sample was expressed as a relative decrease of its absorbance at Q-band maximum (707 nm for **Pc**, 657 nm for **TPyzPz**, 705 nm for **TPyzPyzPz**, 754 nm for **6,7-TQPz**, 731 nm for **2,3-TQPz**, 786 nm for **Nc**, and 674 nm for **ZnPc**). Unsubstituted **ZnPc** was added to the series as a reference. All experiments were performed three times, and the data represent a mean of these three experiments. A control experiment involved measurement of the same samples in the dark. No spectral changes were observed without irradiation.

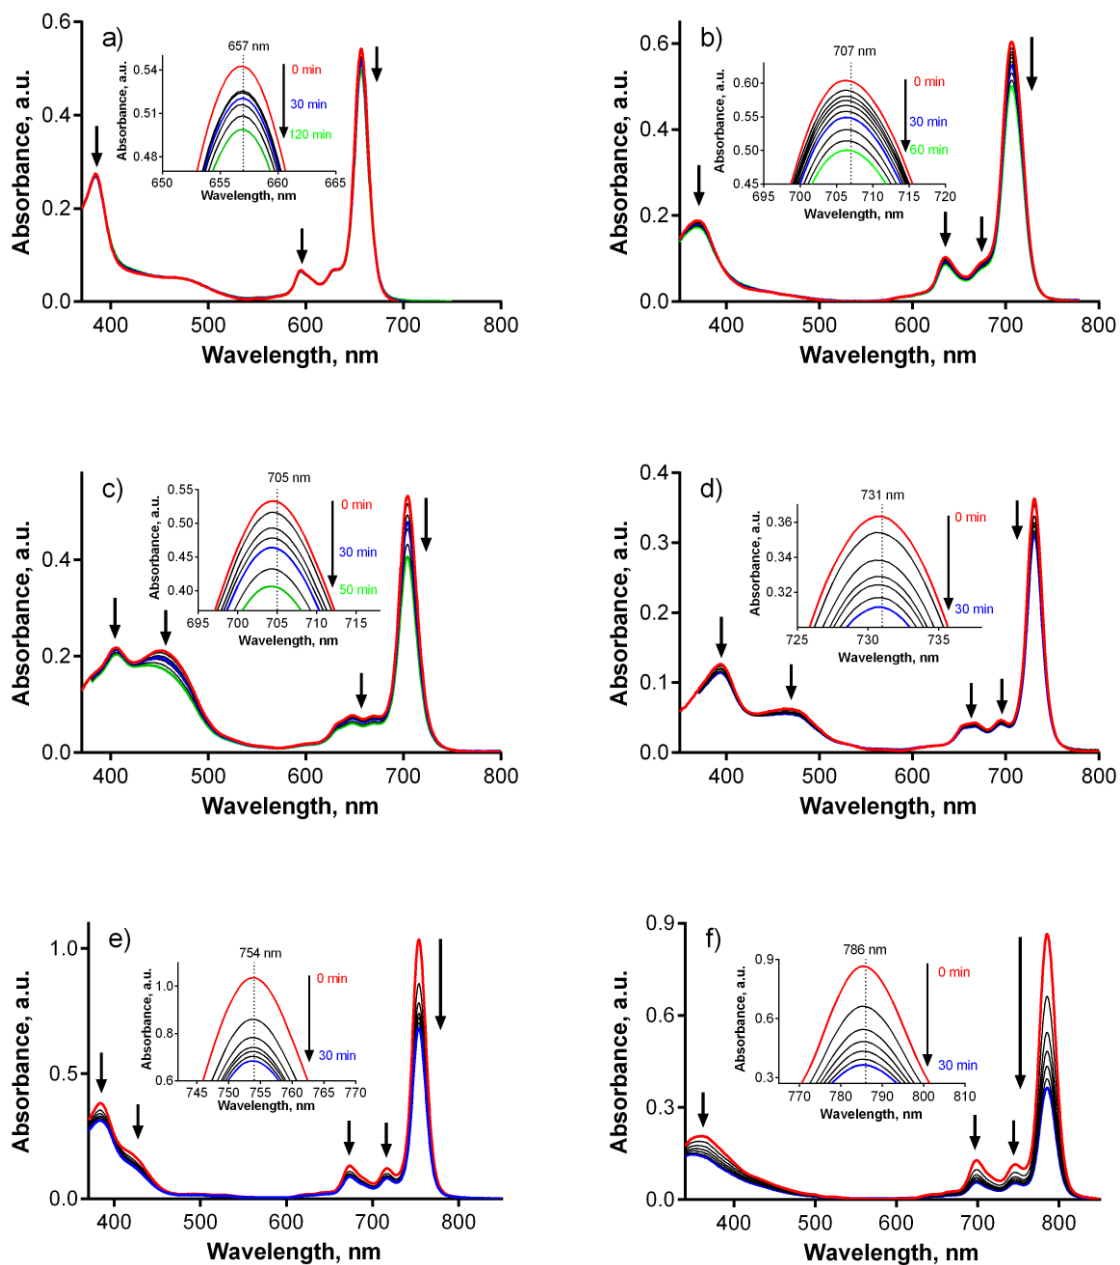

**Figure S12.** Spectral changes of the target compounds upon irradiation of the pyridine solution by halogen lamp (400 W). Red line – before irradiation, blue line – 30 min of irradiation. Insets: enlarged area of the Q-band. **TPyzPz** (a), **Pc** (b), **TPyzPyzPz** (c), **2,3-TQPz** (d), **6,7-TQPz** (e), **Nc** (f).

## ELECTROCHEMISTRY AND SPECTROELECTROCHEMISTRY

The electrochemical measurements (cyclic voltammetry, square wave voltammetry) were performed at room temperature (25 °C) using an Autolab PGSTAT30 potentiostat. Measurements were carried out with a three electrode setup consisting of a glassy carbon electrode (working electrode), a platinum wire (counter electrode), and a Ag/AgNO<sub>3</sub> non-aqueous electrode (reference electrode). The cell was degassed under an argon atmosphere, solution of appropriate compound (typically  $1 \times 10^{-3}$  M) in anhydrous solvent (THF or pyridine) containing 0.1 M tetrabutylammonium hexafluorophosphate (TBAPF<sub>6</sub>) as a supporting electrolyte was added and purged by argon for 5 minutes to remove dissolved oxygen. Different scan rates were applied at cyclic voltammetry measurement (50 mV/s, 100 mV/s and 200 mV/s) for each sample and solvent. Half-wave potentials ( $E_{1/2}$ ) were calculated from square wave voltammetry (sweep width 25.05 mV, step potential 19.5 mV) and are referenced to a saturated calomel electrode (SCE) with ferrocene as the internal standard (half-wave potential  $E_{1/2}(\text{Fc}/\text{Fc}^+) = +0.38$  V vs. SCE<sup>15</sup>).

Spectroelectrochemical data were collected on a JASCO-720 spectrophotometer at room temperature, and the experiments were conducted using a CHI-620C electrochemical analyzer using a custom-made 1 mm cell, and a Pt mesh-working electrode. Measurements were conducted in 0.3 M tetrabutylammonium perchlorate (TBAP) in pyridine.

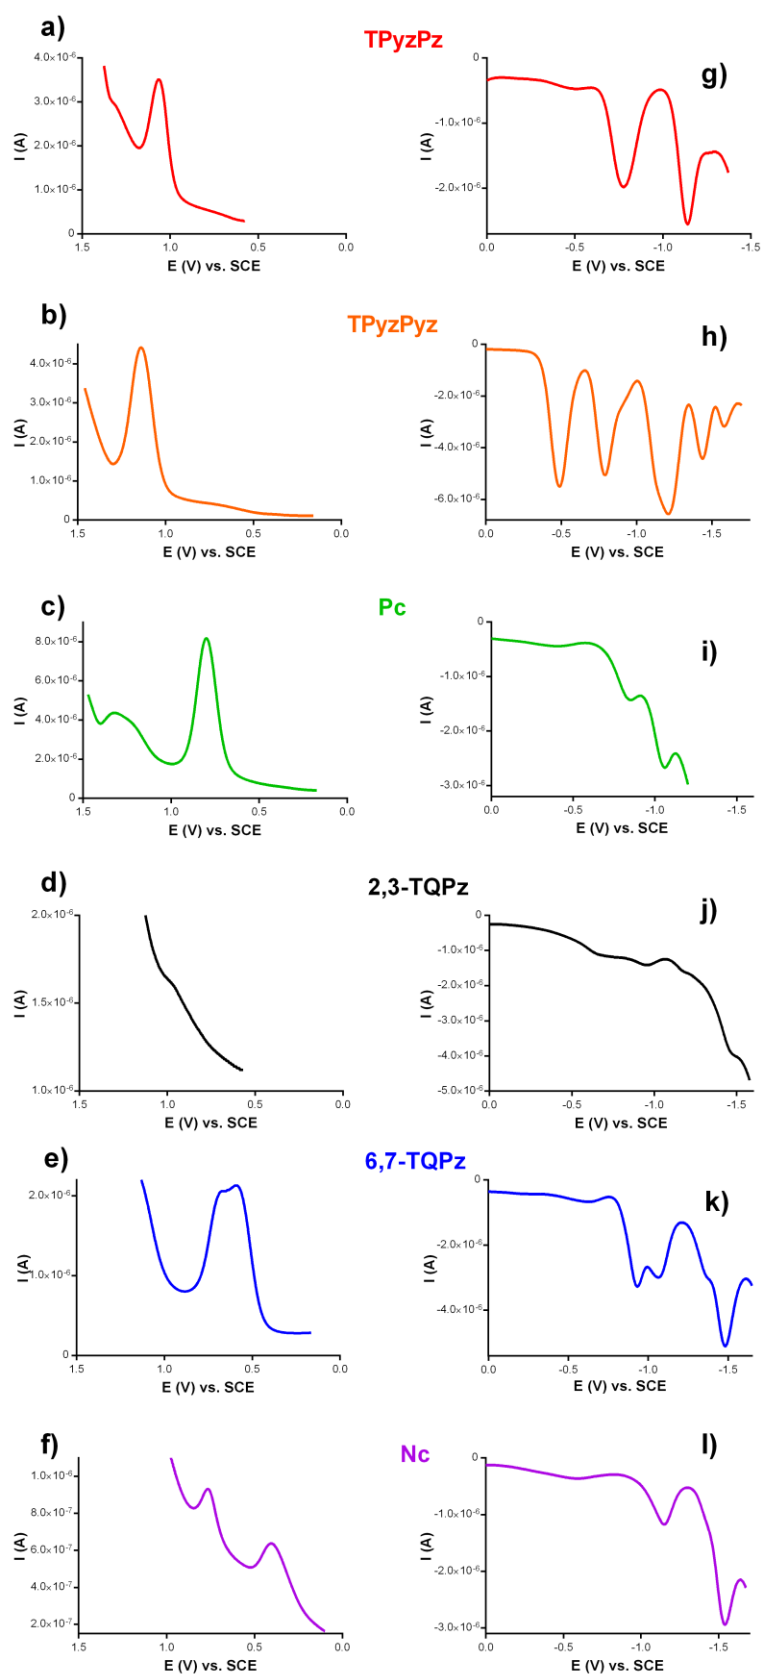

**Figure S13.** Square wave voltammograms of studied compounds in THF at 25 °C (a-f oxidation processes; g-l reduction processes). Sweep width 25.05 mV, step potential 19.5 mV.

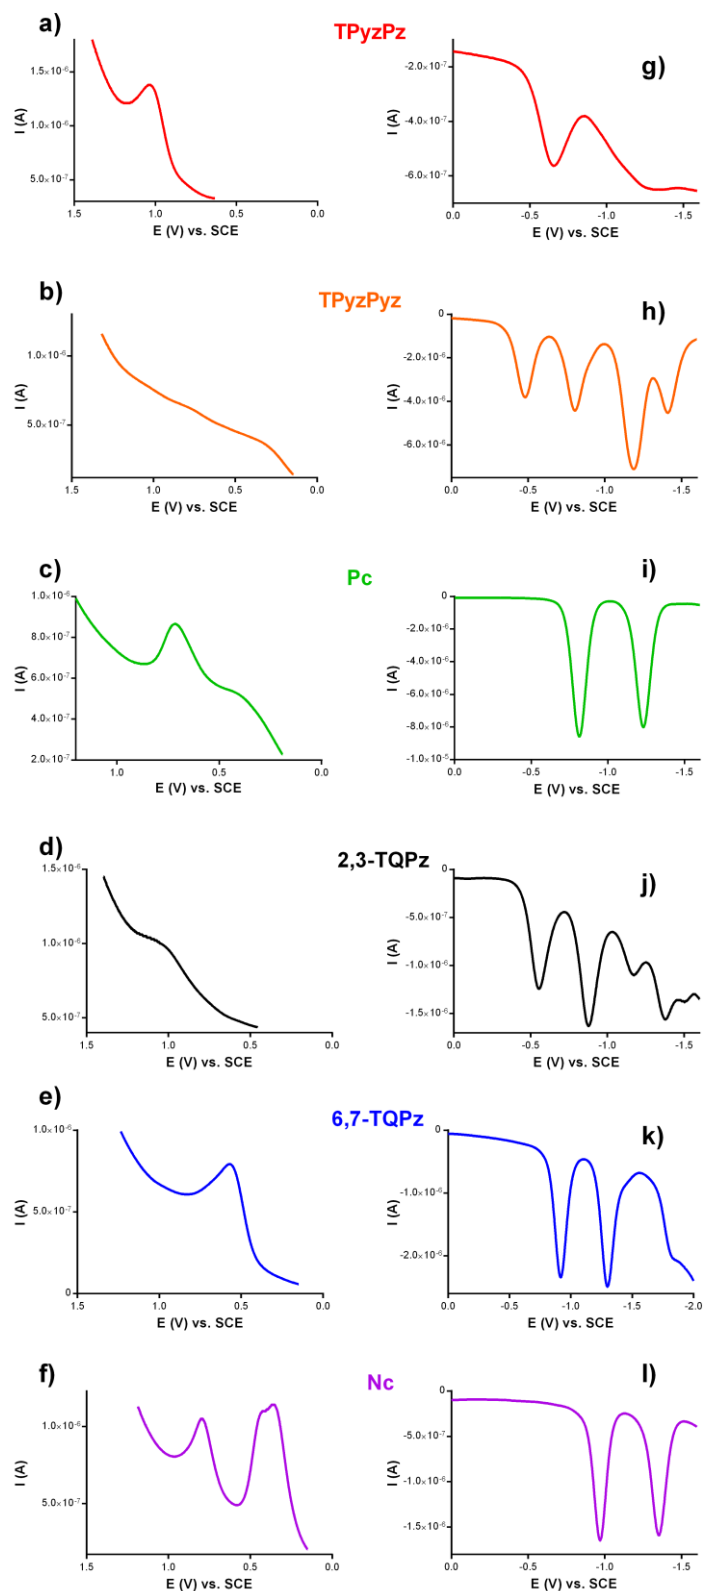

**Figure S14.** Square wave voltammograms of studied compounds in pyridine at 25 °C (a-f oxidation processes; g-l reduction processes). Sweep width 25.05 mV, step potential 19.5 mV.  $E_{\text{ox}}^1$  of TPyzPyz mentioned in Table 3 was determined directly from appropriate cyclic voltammogram due to low quality of square wave voltammogram b).

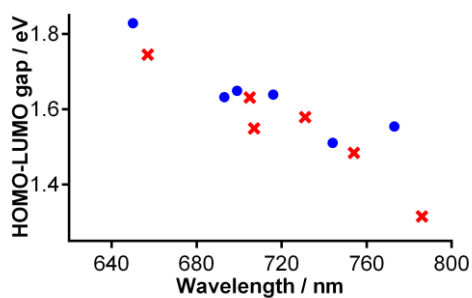

**Figure S15.** Dependence of HOMO-LUMO gap determined from electrochemical measurements on wavelength of maximum in Q-band in the studied compounds (TPyzPz, Pc, TPyzPz, 2,3-TQPz, 6,7-TQPz, Nc) in THF (blue dot) and pyridine (red cross).

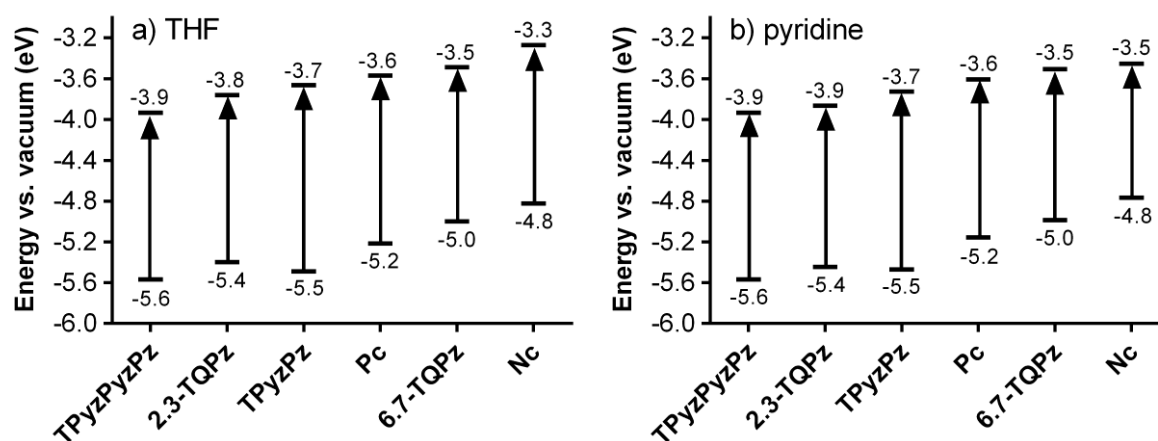

**Figure S16.** Positions of HOMO-LUMO (eV) of studied compounds in THF (a) and pyridine (b) calculated from experimental electrochemical data.



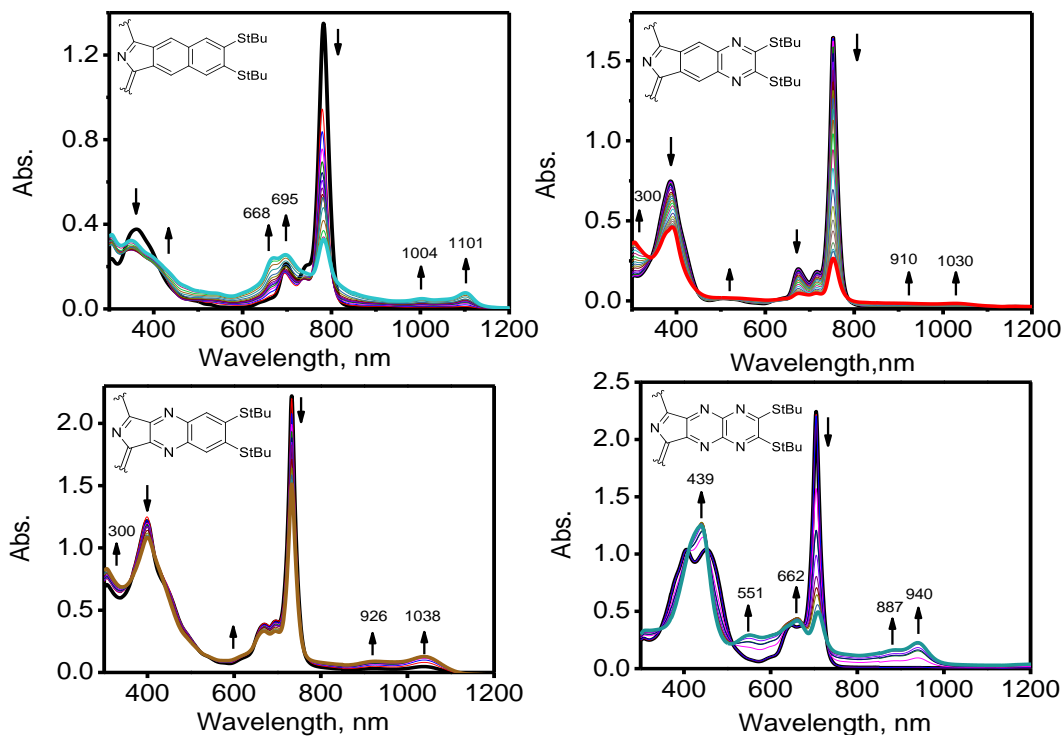

**Figure S17.** Spectroelectrochemical transformation of the neutral **Nc**, **2,3-TQPz**, **6,7-TQPz**, and **TPyzPyzPz** complexes during the first reductions in pyridine/TBAP system.

## THEORETICAL CALCULATIONS

The starting geometries of all compounds were optimized in  $D_{4h}$  symmetry using the B3LYP exchange-correlation functional<sup>16, 17</sup> coupled with the 6-31G(d) basis set for all atoms.<sup>18</sup> Energy minima in optimized geometries were confirmed by frequency calculations. In all cases, *tert*-butyl groups were replaced with methyl substituents in order to reduce a computational cost. Pyridine was used as a solvent in all of the single point DFT-PCM and TDDFT-DCM calculations; solvent effects were calculated using the polarized continuum model (PCM).<sup>19</sup> The first 70 states of each compound were calculated in all TDDFT-PCM calculations. All DFT calculations were conducted using the Gaussian 09 software package,<sup>20</sup> and the QMForge program<sup>21</sup> was used for the molecular orbital analysis.

**Table S3.** TDDFT-PCM predicted excited state energies (E), oscillator strengths (f), and expansion coefficients for target compounds.

| Excited state | E, nm (cm <sup>-1</sup> ) | f      | Expansion Coefficients                                                                                                    |
|---------------|---------------------------|--------|---------------------------------------------------------------------------------------------------------------------------|
| <b>Pc</b>     |                           |        |                                                                                                                           |
|               | 693(14430)                | 1.0068 | 243 → 244(0.57476), 243 → 245(-0.40016)                                                                                   |
| 2             | 693(14430)                | 1.0068 | 243 → 244(0.40016), 243 → 245(0.57476)                                                                                    |
| 8             | 484(20661)                | 0.4999 | 239 → 244(0.67669), 242 → 244(-0.19075)                                                                                   |
| 9             | 484(20661)                | 0.4999 | 239 → 245(0.67669), 242 → 245(0.19075)                                                                                    |
| 28            | 328(30487)                | 0.8907 | 233 → 245(-0.43949), 234 → 244(-0.26238), 243 → 249(0.45902)                                                              |
| 29            | 328(30487)                | 0.8907 | 233 → 244(-0.43949), 234 → 245(0.26238), 243 → 250(0.45902)                                                               |
| <b>TPyzPz</b> |                           |        |                                                                                                                           |
| 1             | 621(16103)                | 0.8599 | 231 → 245(0.11185), 243 → 244(0.69051)                                                                                    |
| 2             | 621(16103)                | 0.86   | 231 → 244(-0.11185), 243 → 245(0.69051)                                                                                   |
| 8             | 502(19920)                | 0.6176 | 239 → 245(0.68723), 242 → 245(0.13355)                                                                                    |
| 9             | 502(19920)                | 0.6177 | 239 → 244(0.68723), 242 → 244(-0.13355)                                                                                   |
| 36            | 351(28490)                | 1.5941 | 231 → 244(0.46891), 234 → 245(-0.23877), 239 → 248(-0.19294), 240 → 246(-0.29719), 240 → 247(0.21456), 242 → 248(0.19520) |
| 36            | 351(28490)                | 1.5941 | 231 → 245(0.46891), 234 → 244(0.23876), 239 → 249(0.19294), 241 → 246(-0.29719), 241 → 247(-0.21456), 242 → 249(0.19520)  |

**Nc**

|    |            |        |                                                                                                                            |
|----|------------|--------|----------------------------------------------------------------------------------------------------------------------------|
| 1  | 799(12515) | 1.2592 | 295 → 296(0.60192), 295 → 297(-0.36597)                                                                                    |
| 2  | 799(12515) | 1.2592 | 295 → 296(0.36597), 295 → 297(0.60192)                                                                                     |
| 15 | 448(22321) | 0.6819 | 288 → 296(0.13073), 288 → 297(0.55160), 291 → 297(0.35800), 295 → 301(-0.18884)                                            |
| 16 | 448(22321) | 0.6819 | 288 → 296(0.55160), 288 → 297(-0.13073), 291 → 296(-0.35800), 295 → 300(-0.18884)                                          |
| 28 | 338(29585) | 1.9099 | 285 → 297(0.43461), 288 → 300(-0.20471), 289 → 298(0.33666), 289 → 299(-0.24351), 291 → 300(-0.20656), 293 → 298(-0.15406) |
| 29 | 338(29585) | 1.9099 | 285 → 296(0.43461), 288 → 301(0.20471), 290 → 298(0.33666), 290 → 299(0.24351), 291 → 301(-0.20656), 292 → 298(-0.15406)   |

**TPyzPyzPz**

|    |            |        |                                                                                                      |
|----|------------|--------|------------------------------------------------------------------------------------------------------|
| 1  | 674(14836) | 0.965  | 295 → 296(0.49906), 295 → 297(0.48447)                                                               |
| 2  | 674(14836) | 0.965  | 295 → 296(-0.48447), 295 → 297(0.49906)                                                              |
| 11 | 484(20661) | 1.3128 | 291 → 297( 0.49741), 294 → 297(-0.10826), 295 → 301(0.45721)                                         |
| 12 | 484(20661) | 1.3128 | 291 → 296(0.49741), 294 → 296(0.10826), 295 → 300(0.45721)                                           |
| 32 | 393(25445) | 0.7871 | 283 → 297(-0.19979), 287 → 296(-0.18980), 287 → 297(0.54832), 293 → 298(0.22595), 293 → 299(0.14803) |
| 33 | 393(25445) | 0.7871 | 283 → 296(0.19979), 287 → 296(0.54832), 287 → 297(0.18980), 292 → 298(0.22595), 292 → 299(-0.14803)  |

**2,3-TQPz**

|    |            |        |                                                                                                                                                                    |
|----|------------|--------|--------------------------------------------------------------------------------------------------------------------------------------------------------------------|
| 1  | 716(13966) | 1.0524 | 295 → 296(0.33959), 295 → 297(0.61196)                                                                                                                             |
| 2  | 716(13966) | 1.0524 | 295 → 296(0.61196), 295 → 297(-0.33959)                                                                                                                            |
| 8  | 503(19880) | 0.7062 | 291 → 296(0.67048), 291 → 297(0.14454), 294 → 296(-0.13812)                                                                                                        |
| 9  | 503(19880) | 0.7062 | 291 → 296(-0.14454), 291 → 297(0.67048), 294 → 297(0.13812)                                                                                                        |
| 30 | 390(25641) | 1.114  | 282 → 296(-0.16727), 287 → 297(-0.12534), 291 → 301(0.14181), 292 → 298(0.25724), 292 → 299(0.14379), 293 → 298(0.46234), 293 → 299(-0.25843), 294 → 301(-0.15677) |

|    |            |       |                                                                                                                                                                    |
|----|------------|-------|--------------------------------------------------------------------------------------------------------------------------------------------------------------------|
| 31 | 390(25641) | 1.114 | 282 → 297(-0.16727), 287 → 296(0.12534), 291 → 300(-0.14181), 292 → 298(0.46234), 292 → 299(0.25843), 293 → 298(-0.25724), 293 → 299(0.14379), 294 → 300(-0.15677) |
|----|------------|-------|--------------------------------------------------------------------------------------------------------------------------------------------------------------------|

**6,7-TQPz**

|    |            |        |                                                                                                                                                                                          |
|----|------------|--------|------------------------------------------------------------------------------------------------------------------------------------------------------------------------------------------|
| 1  | 743(13458) | 1.1882 | 295 → 296(0.39106), 295 → 297(0.58354)                                                                                                                                                   |
| 2  | 743(13458) | 1.1882 | 295 → 296(0.58354), 295 → 297(-0.39106)                                                                                                                                                  |
| 12 | 438(22831) | 0.7186 | 291 → 296(0.68469), 294 → 296(-0.14245)                                                                                                                                                  |
| 13 | 438(22831) | 0.7186 | 291 → 297(0.68469), 294 → 297(0.14245)                                                                                                                                                   |
| 27 | 354(28248) | 1.4196 | 282 → 296(0.36260), 282 → 297(0.15187), 286 → 296(-0.13515), 286 → 297(0.32268), 291 → 301(0.16227), 292 → 298(0.11511), 293 → 298(0.27483), 293 → 299(-0.22106), 294 → 301(-0.16591)    |
| 28 | 354(28248) | 1.4196 | 282 → 296(-0.15187), 282 → 297(0.36260), 286 → 296(-0.32268), 286 → 297(-0.13515), 291 → 300(-0.16227), 292 → 298(0.27483), 292 → 299(0.22106), 293 → 298(-0.11511), 294 → 300(-0.16591) |

---

## DFT-PCM predicted frontier orbitals for target compounds

**Figure S18.** DFT-PCM predicted frontier orbitals for target compounds.

Molecular Orbitals for **Pc**:

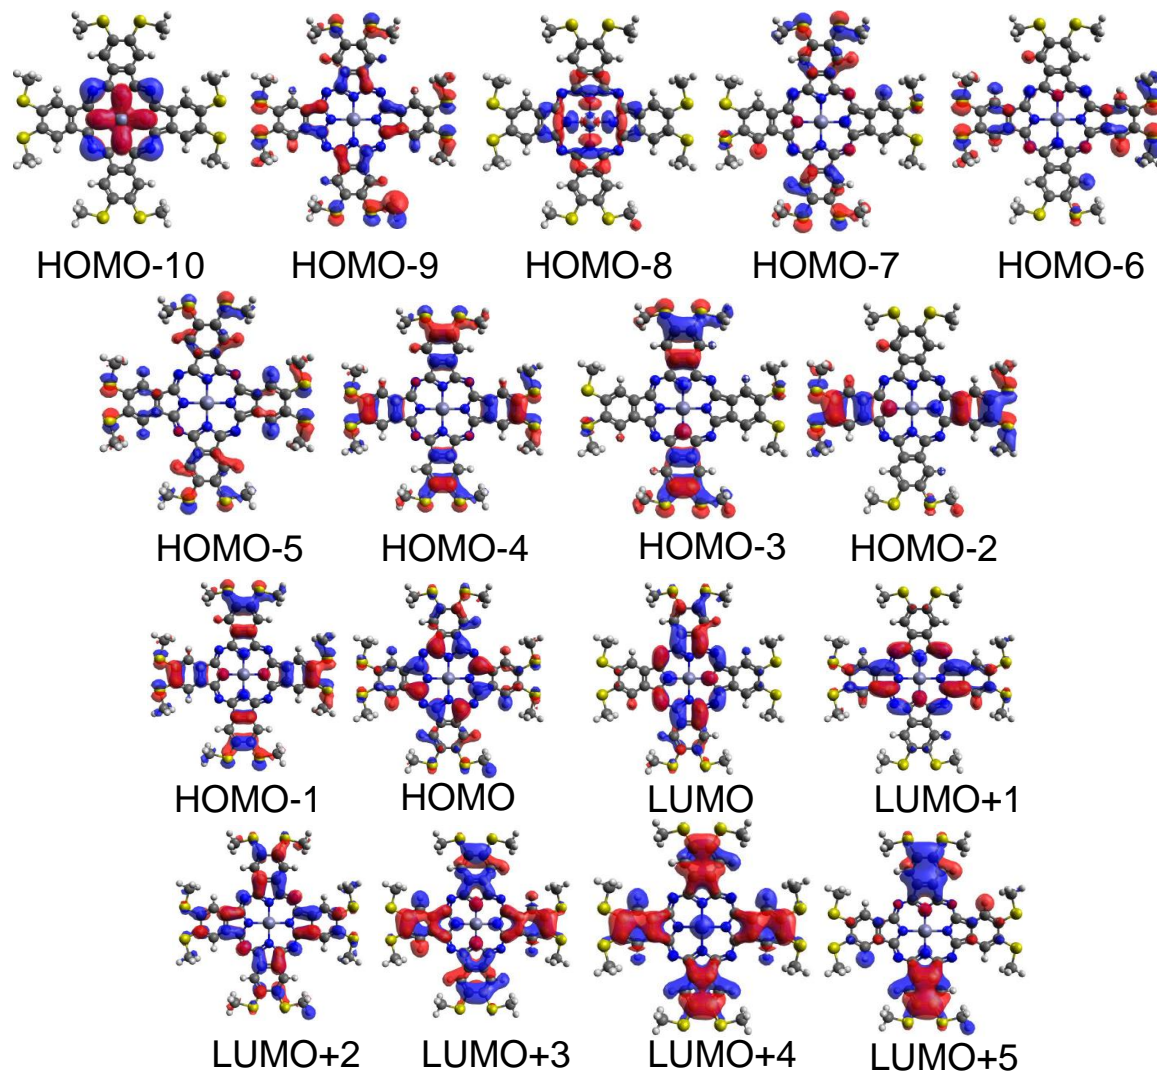

Molecular Orbitals for TPyzPz:

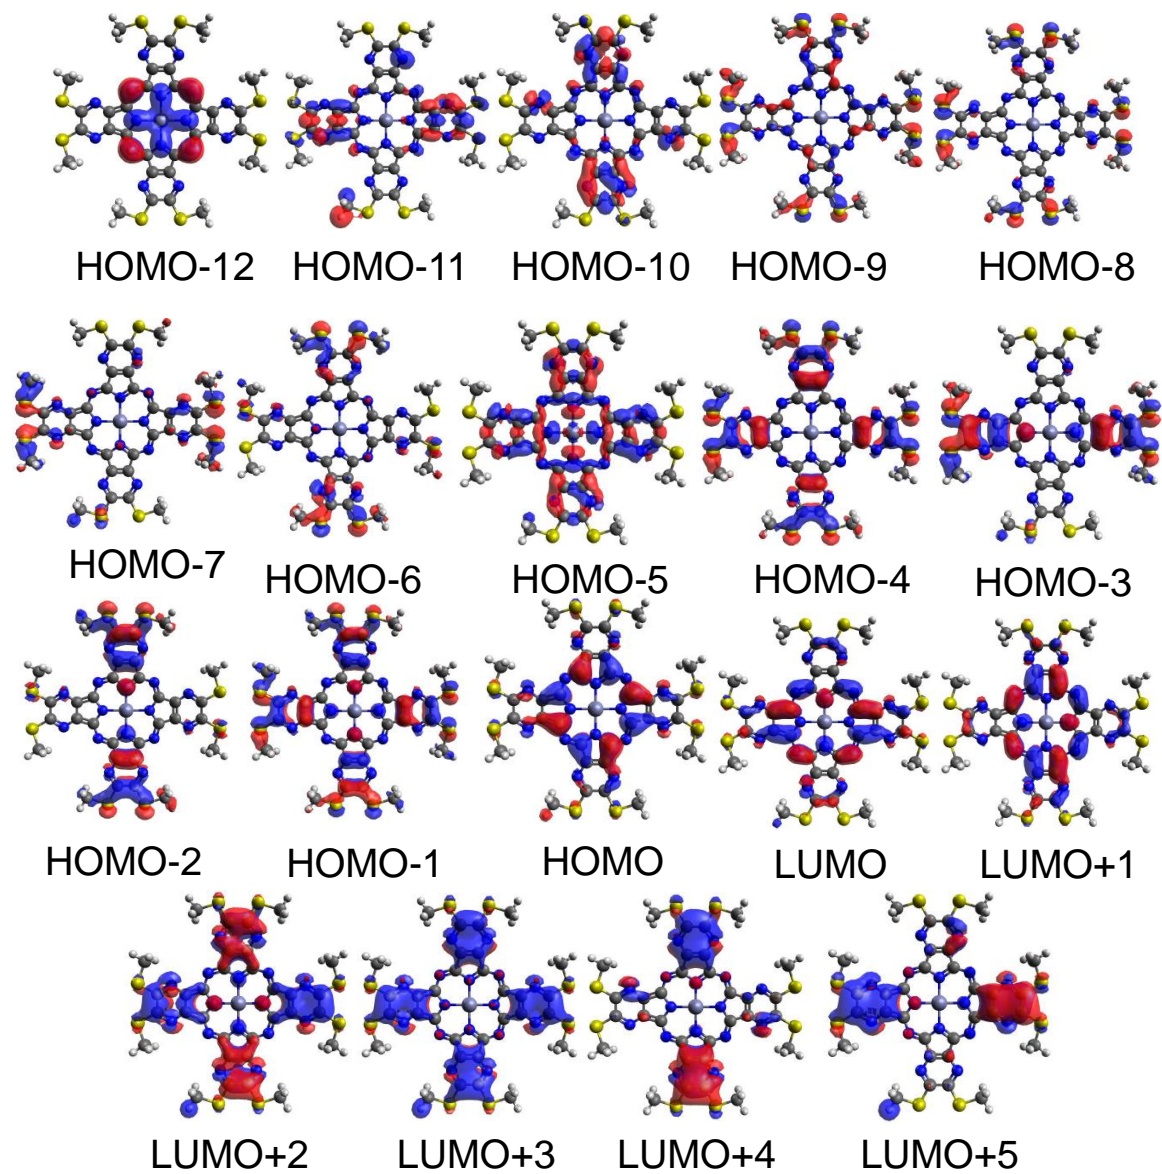

Molecular Orbitals for Nc:

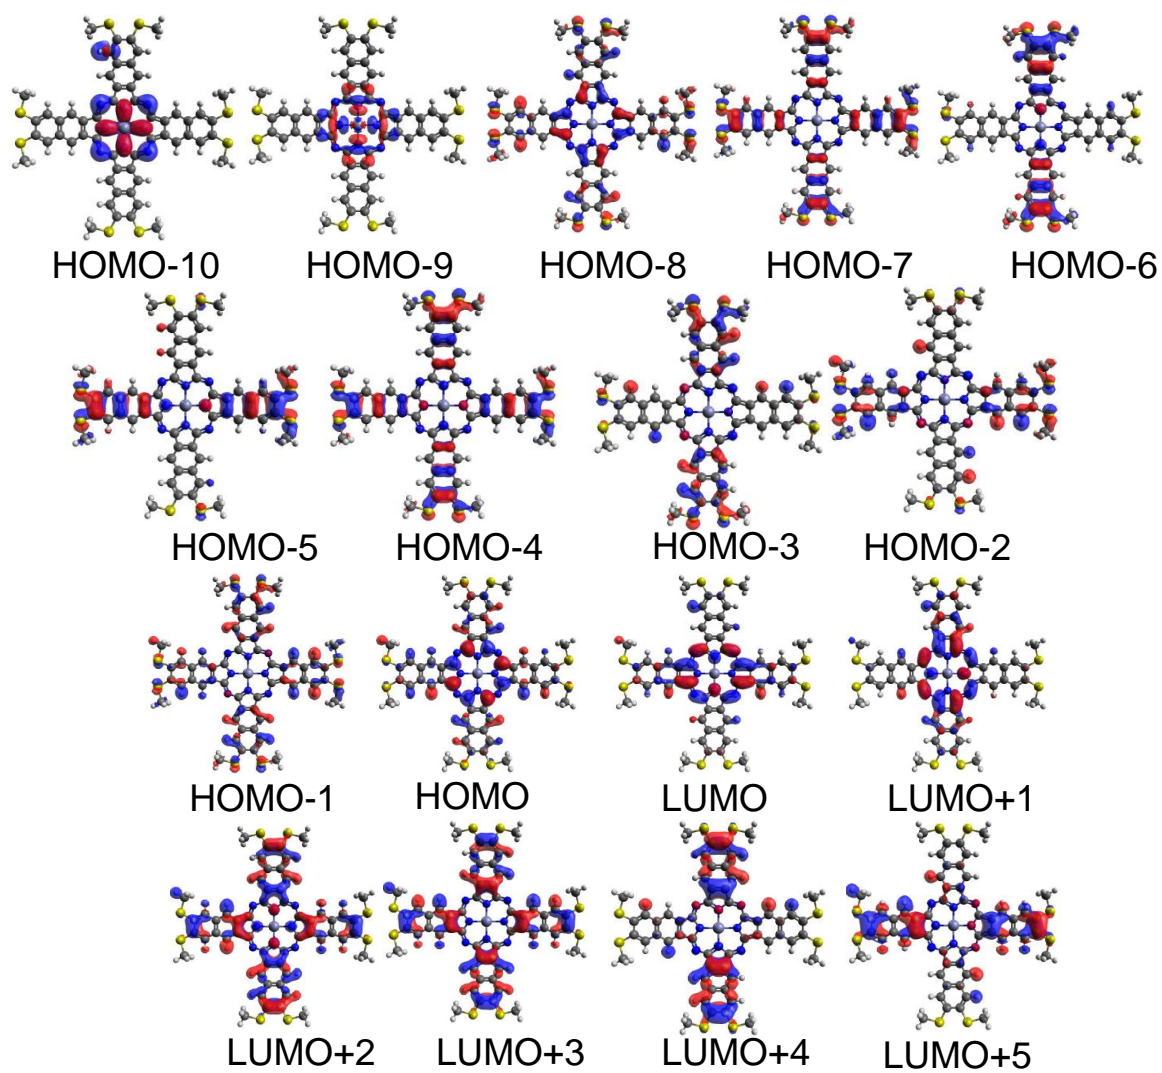

Molecular Orbitals for **TPyzPyzPz**:

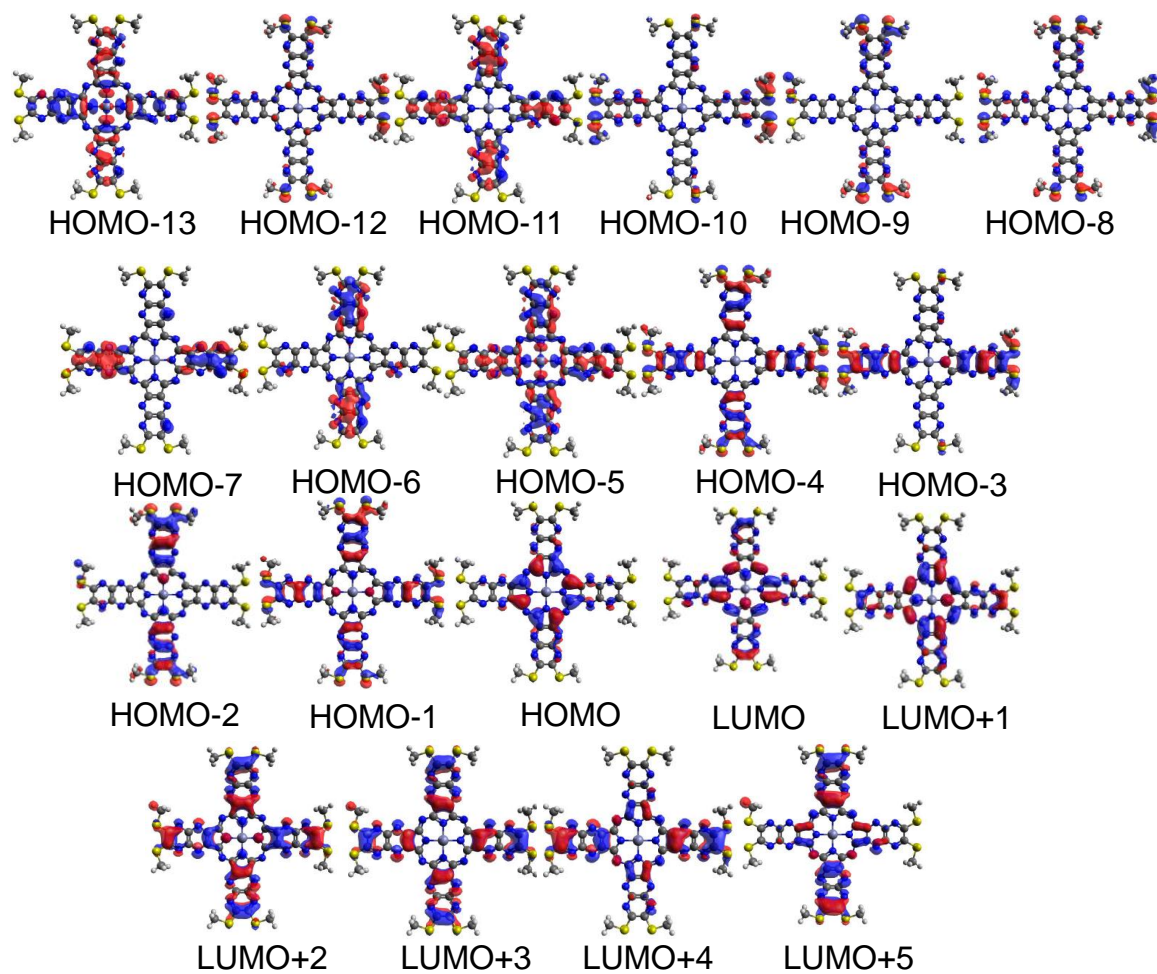



Molecular Orbitals for 2,3-TQPz:

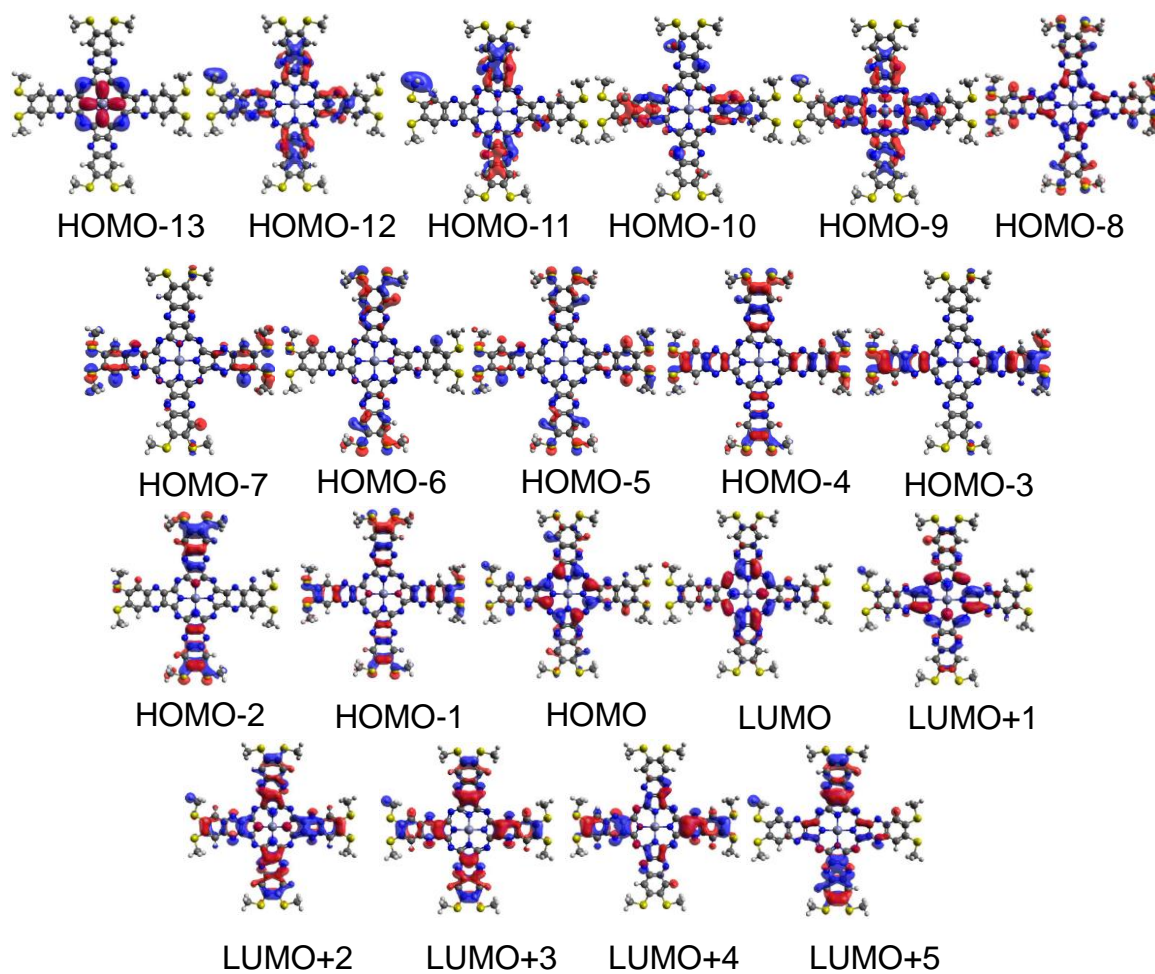

Molecular Orbitals for 6,7-TQPz:

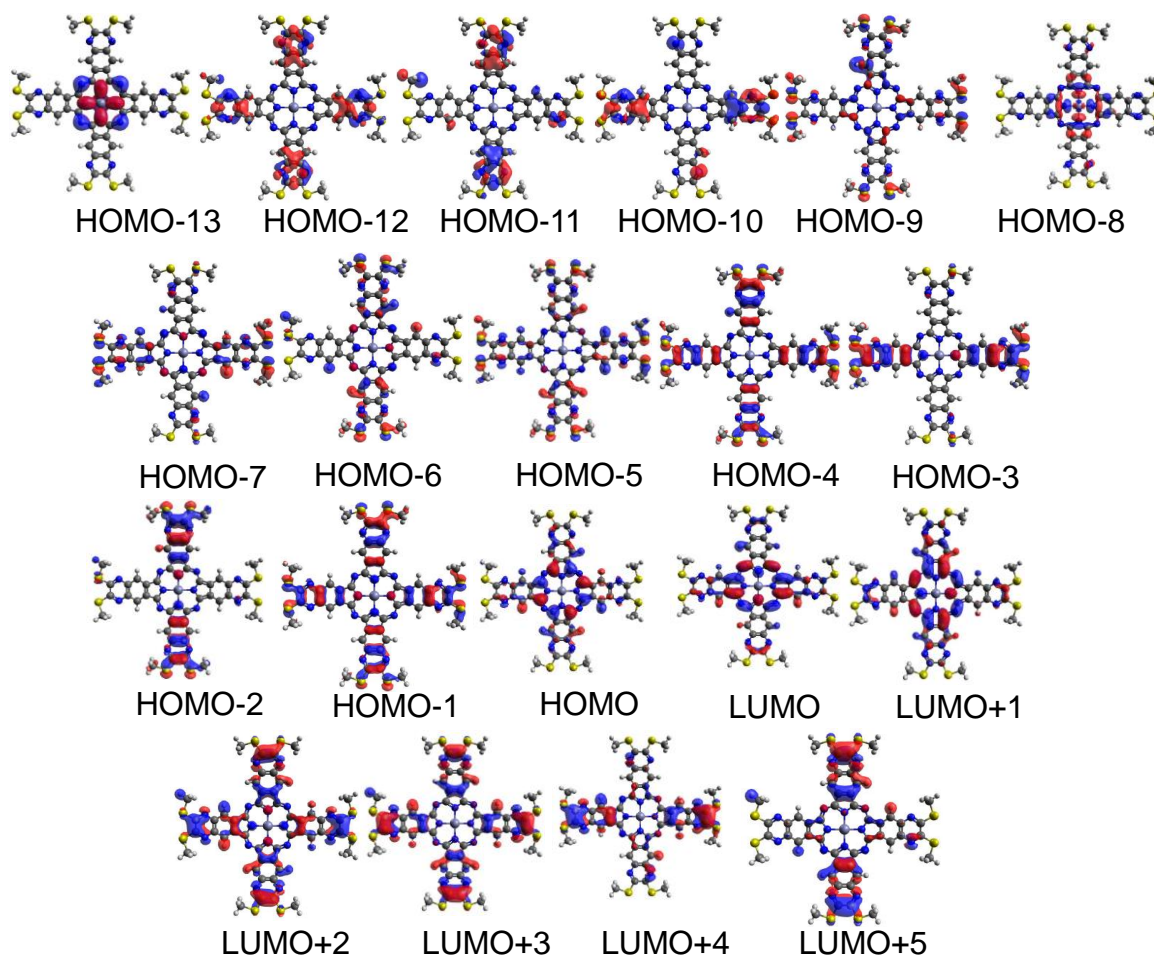

**DFT-PCM predicted compositions for the frontier orbitals****Table S4.** DFT-PCM predicted compositions for the frontier orbitals.<sup>a</sup>

| % Composition |               |                       |             |                                                      |                 |
|---------------|---------------|-----------------------|-------------|------------------------------------------------------|-----------------|
| MO            | Energy        | Symmetry              | Zinc        | N <sub>meso</sub> + N <sub>pyrr</sub> <sup>[b]</sup> | All other atoms |
| <b>Pc</b>     |               |                       |             |                                                      |                 |
| 249           | -0.692        | e <sub>g</sub>        | 0.07        | 7.71                                                 | 92.22           |
| 248           | -0.798        | a <sub>2u</sub>       | 3.97        | 5.56                                                 | 90.47           |
| 247           | -0.953        | b <sub>2u</sub>       | 0.00        | 16.73                                                | 83.27           |
| 246           | -1.225        | b <sub>1u</sub>       | 0.00        | 21.26                                                | 78.74           |
| 245           | -2.833        | e <sub>g</sub>        | 0.31        | 30.56                                                | 69.13           |
| <b>244</b>    | <b>-2.833</b> | <b>e<sub>g</sub></b>  | <b>0.31</b> | <b>30.56</b>                                         | <b>69.13</b>    |
| <b>243</b>    | <b>-4.927</b> | <b>a<sub>1u</sub></b> | <b>0.00</b> | <b>0.17</b>                                          | <b>99.83</b>    |
| 242           | -5.763        | b <sub>2u</sub>       | 0.00        | 7.86                                                 | 92.14           |
| 241           | -5.781        | e <sub>g</sub>        | 0.27        | 7.01                                                 | 92.72           |
| 240           | -5.781        | e <sub>g</sub>        | 0.27        | 7.01                                                 | 92.72           |
| 239           | -5.793        | a <sub>2u</sub>       | 0.14        | 3.45                                                 | 96.41           |
| 238           | -6.366        | b <sub>1u</sub>       | 0.00        | 2.26                                                 | 97.74           |
| 237           | -6.375        | e <sub>g</sub>        | 0.10        | 7.13                                                 | 92.77           |
| 236           | -6.375        | e <sub>g</sub>        | 0.10        | 7.13                                                 | 92.77           |
| 235           | -6.602        | b <sub>1u</sub>       | 27.64       | 49.61                                                | 22.75           |
| 234           | -6.776        | a <sub>1u</sub>       | 0.00        | 0.04                                                 | 99.96           |
| 233           | -6.988        | a <sub>2u</sub>       | 1.63        | 95.65                                                | 2.72            |
| <b>Nc</b>     |               |                       |             |                                                      |                 |
| 301           | -1.412        | e <sub>g</sub>        | 0.04        | 6.72                                                 | 93.24           |
| 300           | -1.412        | e <sub>g</sub>        | 0.04        | 6.72                                                 | 93.24           |
| 299           | -1.538        | a <sub>2u</sub>       | 1.80        | 5.20                                                 | 93.00           |
| 298           | -1.644        | b <sub>2u</sub>       | 0.00        | 13.47                                                | 86.53           |
| 297           | -2.74         | e <sub>g</sub>        | 0.34        | 29.50                                                | 70.16           |

|            |               |                       |             |              |              |
|------------|---------------|-----------------------|-------------|--------------|--------------|
| <b>296</b> | <b>-2.74</b>  | <b>e<sub>g</sub></b>  | <b>0.34</b> | <b>29.50</b> | <b>70.16</b> |
| <b>295</b> | <b>-4.582</b> | <b>a<sub>1u</sub></b> | <b>0.00</b> | <b>0.15</b>  | <b>99.85</b> |
| 294        | -5.76         | b <sub>1u</sub>       | 0.00        | 2.37         | 97.63        |
| 293        | -5.794        | e <sub>g</sub>        | 0.02        | 4.89         | 95.09        |
| 292        | -5.794        | e <sub>g</sub>        | 0.02        | 4.89         | 95.09        |
| 291        | -5.84         | b <sub>2u</sub>       | 0.00        | 4.57         | 95.43        |
| 290        | -5.854        | e <sub>g</sub>        | 0.20        | 5.75         | 94.05        |
| 289        | -5.854        | e <sub>g</sub>        | 0.20        | 5.75         | 94.05        |
| 288        | -5.857        | a <sub>2u</sub>       | 0.07        | 2.00         | 97.93        |
| 287        | -6.239        | a <sub>1u</sub>       | 0.00        | 0.05         | 99.95        |
| 286        | -6.625        | b <sub>1g</sub>       | 27.32       | 50.21        | 22.47        |
| 285        | -6.942        | a <sub>2u</sub>       | 1.51        | 94.59        | 3.90         |

**TPyzPz**

|            |               |                       |             |              |              |
|------------|---------------|-----------------------|-------------|--------------|--------------|
| 249        | -1.748        | e <sub>g</sub>        | 0.05        | 6.07         | 93.88        |
| 248        | -1.748        | e <sub>g</sub>        | 0.05        | 6.07         | 93.88        |
| 247        | -1.843        | a <sub>2u</sub>       | 1.40        | 4.51         | 94.09        |
| 246        | -1.934        | b <sub>2u</sub>       | 0.00        | 11.63        | 88.37        |
| 245        | -3.28         | e <sub>g</sub>        | 0.33        | 32.28        | 67.39        |
| <b>244</b> | <b>-3.28</b>  | <b>e<sub>g</sub></b>  | <b>0.33</b> | <b>32.28</b> | <b>67.39</b> |
| <b>243</b> | <b>-5.607</b> | <b>a<sub>1u</sub></b> | <b>0.00</b> | <b>0.19</b>  | <b>99.81</b> |
| 242        | -6.118        | b <sub>2u</sub>       | 0.00        | 9.16         | 90.84        |
| 241        | -6.14         | e <sub>g</sub>        | 0.33        | 8.57         | 91.10        |
| 240        | -6.14         | e <sub>g</sub>        | 0.33        | 8.57         | 91.10        |
| 239        | -6.16         | a <sub>2u</sub>       | 0.15        | 4.08         | 95.77        |
| 238        | -6.759        | b <sub>1g</sub>       | 17.65       | 36.68        | 45.67        |
| 237        | -6.988        | e <sub>g</sub>        | 0.04        | 2.80         | 97.16        |
| 236        | -6.988        | e <sub>g</sub>        | 0.04        | 2.80         | 97.16        |
| 235        | -6.993        | b <sub>1u</sub>       | 0.00        | 0.77         | 99.23        |
| 234        | -7.157        | a <sub>1u</sub>       | 0.00        | 0.02         | 99.98        |

|     |        |                 |      |       |       |
|-----|--------|-----------------|------|-------|-------|
| 233 | -7.193 | e <sub>u</sub>  | 0.10 | 7.34  | 92.56 |
| 232 | -7.193 | e <sub>u</sub>  | 0.10 | 7.34  | 92.56 |
| 231 | -7.272 | a <sub>2u</sub> | 1.57 | 96.07 | 2.36  |

### TPyzPyzPz

|            |               |                       |             |              |              |
|------------|---------------|-----------------------|-------------|--------------|--------------|
| 301        | -2.687        | e <sub>g</sub>        | 0.01        | 7.95         | 92.04        |
| 300        | -2.687        | e <sub>g</sub>        | 0.01        | 7.95         | 92.04        |
| 299        | -2.872        | a <sub>2u</sub>       | 0.79        | 4.75         | 94.46        |
| 298        | -2.94         | b <sub>2u</sub>       | 0.00        | 10.91        | 89.09        |
| 297        | -3.523        | e <sub>g</sub>        | 0.39        | 30.48        | 69.13        |
| <b>296</b> | <b>-3.523</b> | <b>e<sub>g</sub></b>  | <b>0.39</b> | <b>30.48</b> | <b>69.13</b> |
| <b>295</b> | <b>-5.705</b> | <b>a<sub>1u</sub></b> | <b>0.00</b> | <b>0.20</b>  | <b>99.80</b> |
| 294        | -6.447        | b <sub>2u</sub>       | 0.00        | 6.01         | 93.99        |
| 293        | -6.461        | e <sub>g</sub>        | 0.21        | 5.59         | 94.20        |
| 292        | -6.461        | e <sub>g</sub>        | 0.21        | 5.59         | 94.20        |
| 291        | -6.473        | a <sub>2u</sub>       | 0.08        | 2.73         | 97.19        |
| 290        | -6.741        | b <sub>1g</sub>       | 7.27        | 19.00        | 73.73        |
| 289        | -6.929        | e <sub>u</sub>        | 0.09        | 3.23         | 96.68        |
| 288        | -6.929        | e <sub>u</sub>        | 0.09        | 3.23         | 96.68        |
| 287        | -6.99         | b <sub>1u</sub>       | 0.00        | 0.43         | 99.57        |
| 286        | -6.991        | e <sub>g</sub>        | 0.02        | 1.48         | 98.50        |
| 285        | -6.991        | e <sub>g</sub>        | 0.02        | 1.48         | 98.50        |
| 284        | -6.992        | a <sub>1g</sub>       | 0.08        | 2.59         | 97.33        |
| 283        | -7.086        | a <sub>1u</sub>       | 0.00        | 0.01         | 99.99        |
| 282        | -7.408        | b <sub>1g</sub>       | 20.12       | 33.87        | 46.01        |
| 281        | -7.464        | a <sub>2u</sub>       | 1.44        | 95.76        | 2.80         |

### 2,3TQPz

|     |        |                 |      |      |       |
|-----|--------|-----------------|------|------|-------|
| 301 | -2.252 | e <sub>g</sub>  | 0.02 | 8.54 | 91.44 |
| 300 | -2.252 | e <sub>g</sub>  | 0.02 | 8.54 | 91.44 |
| 299 | -2.442 | a <sub>2u</sub> | 1.19 | 5.85 | 92.96 |

|            |               |                       |             |              |              |
|------------|---------------|-----------------------|-------------|--------------|--------------|
| 298        | -2.534        | b <sub>2u</sub>       | 0.00        | 13.57        | 86.43        |
| 297        | -3.274        | e <sub>g</sub>        | 0.39        | 31.06        | 68.55        |
| <b>296</b> | <b>-3.274</b> | <b>e<sub>g</sub></b>  | <b>0.39</b> | <b>31.06</b> | <b>68.55</b> |
| <b>295</b> | <b>-5.327</b> | <b>a<sub>1u</sub></b> | <b>0.00</b> | <b>0.17</b>  | <b>99.83</b> |
| 294        | -6.077        | b <sub>2u</sub>       | 0.00        | 4.62         | 95.38        |
| 293        | -6.087        | e <sub>g</sub>        | 0.14        | 4.04         | 95.82        |
| 292        | -6.087        | e <sub>g</sub>        | 0.14        | 4.04         | 95.82        |
| 291        | -6.093        | a <sub>2u</sub>       | 0.07        | 2.07         | 97.86        |
| 290        | -6.246        | b <sub>1u</sub>       | 0.00        | 0.86         | 99.14        |
| 289        | -6.26         | e <sub>g</sub>        | 0.04        | 2.87         | 97.09        |
| 288        | -6.26         | e <sub>g</sub>        | 0.04        | 2.87         | 97.09        |
| 287        | -6.511        | a <sub>1u</sub>       | 0.00        | 0.04         | 99.96        |
| 286        | -6.712        | b <sub>1g</sub>       | 11.84       | 28.36        | 59.80        |
| 285        | -7.042        | e <sub>u</sub>        | 0.12        | 7.00         | 92.88        |
| 284        | -7.042        | e <sub>u</sub>        | 0.12        | 7.00         | 92.88        |
| 283        | -7.174        | a <sub>1g</sub>       | 0.09        | 5.28         | 94.63        |
| 282        | -7.295        | a <sub>2u</sub>       | 1.43        | 95.35        | 3.22         |

**6,7-TQPz**

|            |               |                       |             |              |              |
|------------|---------------|-----------------------|-------------|--------------|--------------|
| 301        | -2.028        | e <sub>g</sub>        | 0.01        | 4.91         | 95.08        |
| 300        | -2.028        | e <sub>g</sub>        | 0.01        | 4.91         | 95.08        |
| 299        | -2.136        | a <sub>2u</sub>       | 0.83        | 3.48         | 95.69        |
| 298        | -2.198        | b <sub>2u</sub>       | 0.00        | 8.74         | 91.26        |
| 297        | -2.993        | e <sub>g</sub>        | 0.35        | 29.65        | 70.00        |
| <b>296</b> | <b>-2.993</b> | <b>e<sub>g</sub></b>  | <b>0.35</b> | <b>29.65</b> | <b>70.00</b> |
| <b>295</b> | <b>-4.963</b> | <b>a<sub>1u</sub></b> | <b>0.00</b> | <b>0.18</b>  | <b>99.82</b> |
| 294        | -6.169        | b <sub>2u</sub>       | 0.00        | 5.81         | 94.19        |
| 293        | -6.182        | e <sub>g</sub>        | 0.21        | 5.12         | 94.67        |
| 292        | -6.182        | e <sub>g</sub>        | 0.21        | 5.12         | 94.67        |
| 291        | -6.195        | a <sub>2u</sub>       | 0.07        | 2.61         | 97.32        |

|     |               |                       |       |       |       |
|-----|---------------|-----------------------|-------|-------|-------|
| 290 | <b>-6.498</b> | <b>b<sub>1u</sub></b> | 0.00  | 2.35  | 97.65 |
| 289 | -6.507        | e <sub>g</sub>        | 0.10  | 7.31  | 92.59 |
| 288 | -6.507        | e <sub>g</sub>        | 0.10  | 7.31  | 92.59 |
| 287 | -6.797        | <b>b<sub>1g</sub></b> | 26.03 | 48.06 | 25.91 |
| 286 | -6.824        | a <sub>1u</sub>       | 0.00  | 0.02  | 99.98 |
| 285 | -7.101        | e <sub>u</sub>        | 0.01  | 0.16  | 99.83 |
| 284 | -7.101        | e <sub>u</sub>        | 0.01  | 0.16  | 99.83 |
| 283 | -7.104        | a <sub>1g</sub>       | 0.01  | 0.17  | 99.82 |
| 282 | -7.12         | a <sub>2u</sub>       | 1.52  | 95.16 | 3.32  |

<sup>a</sup>HOMO and LUMO are in bold; <sup>b</sup>N<sub>meso</sub> are nitrogen atoms in meso-positions and N<sub>pyrr</sub> are nitrogen atoms directly bonded to the central zinc atom.

### Correlations between predicted and experimental data

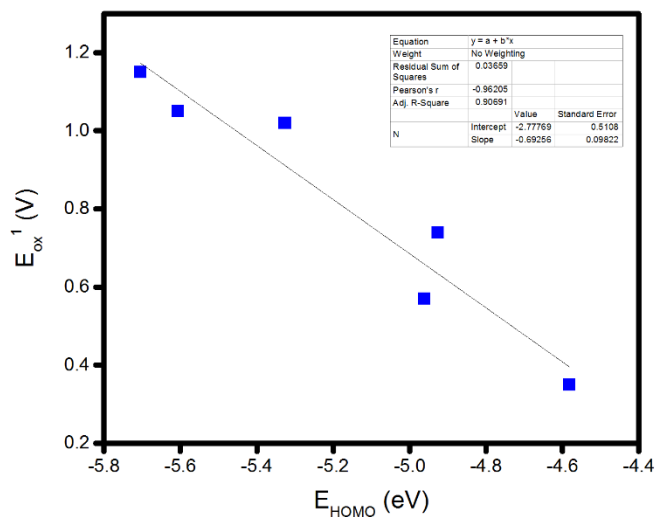

**Figure S19.** Correlation between DFT-PCM predicted energy of HOMO vs. 1<sup>st</sup> oxidation state for each of the 6 target compounds.

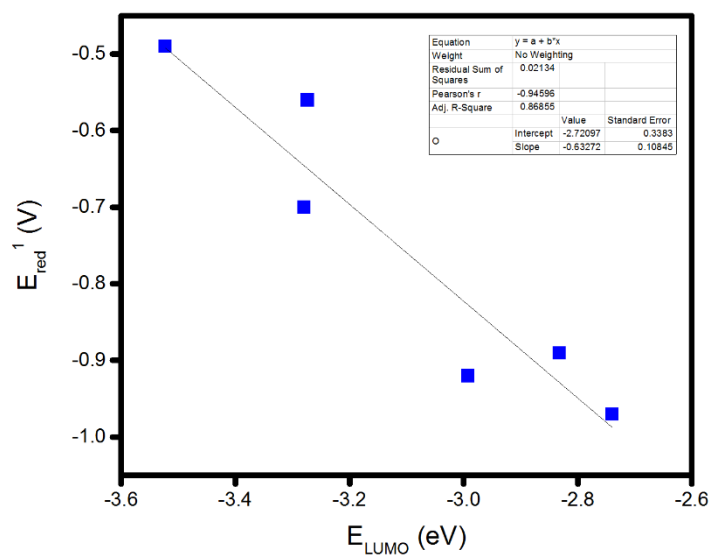

**Figure S20.** Correlation between DFT-PCM predicted energy of LUMO vs. 1<sup>st</sup> reduction state for each of the 6 compounds.

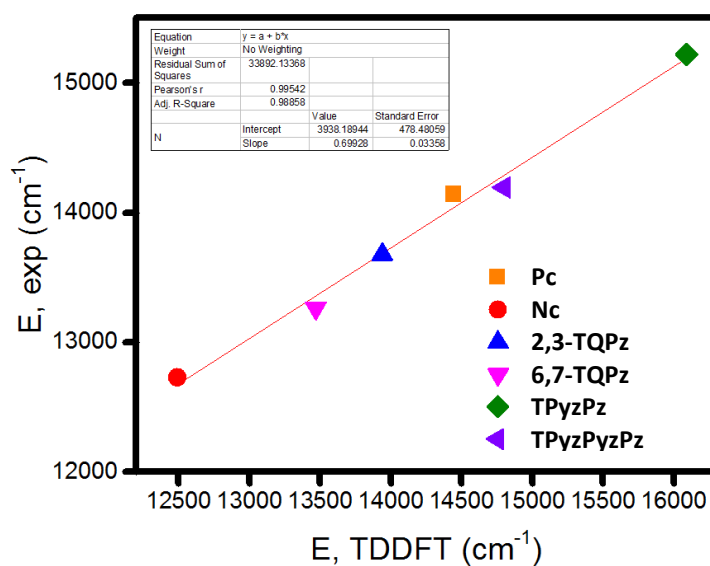

**Figure S21.** Correlation between TDDFT-PCM predicted and experimentally observed energies of Q-band in target compounds.



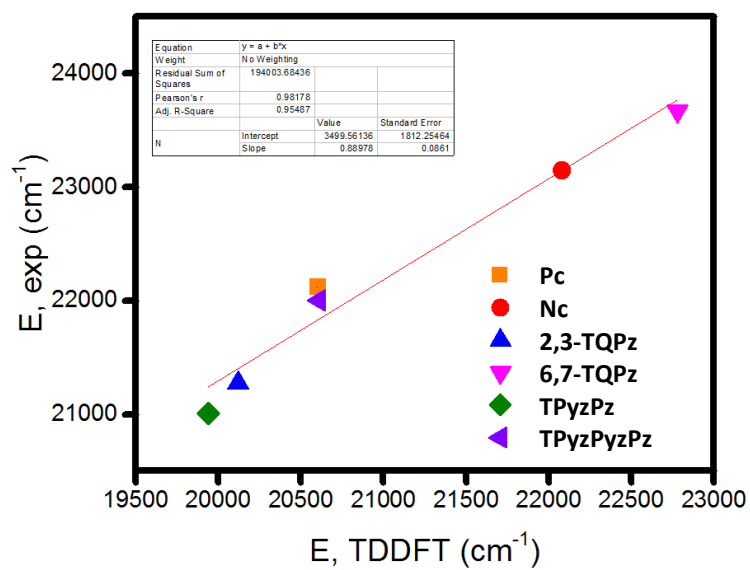

**Figure S22.** Correlation between TDDFT-PCM predicted and experimentally observed energies of unusual ~450-500 nm in target compounds.

### TDDFT-PCM predicted and experimentally observed energies in target compounds.

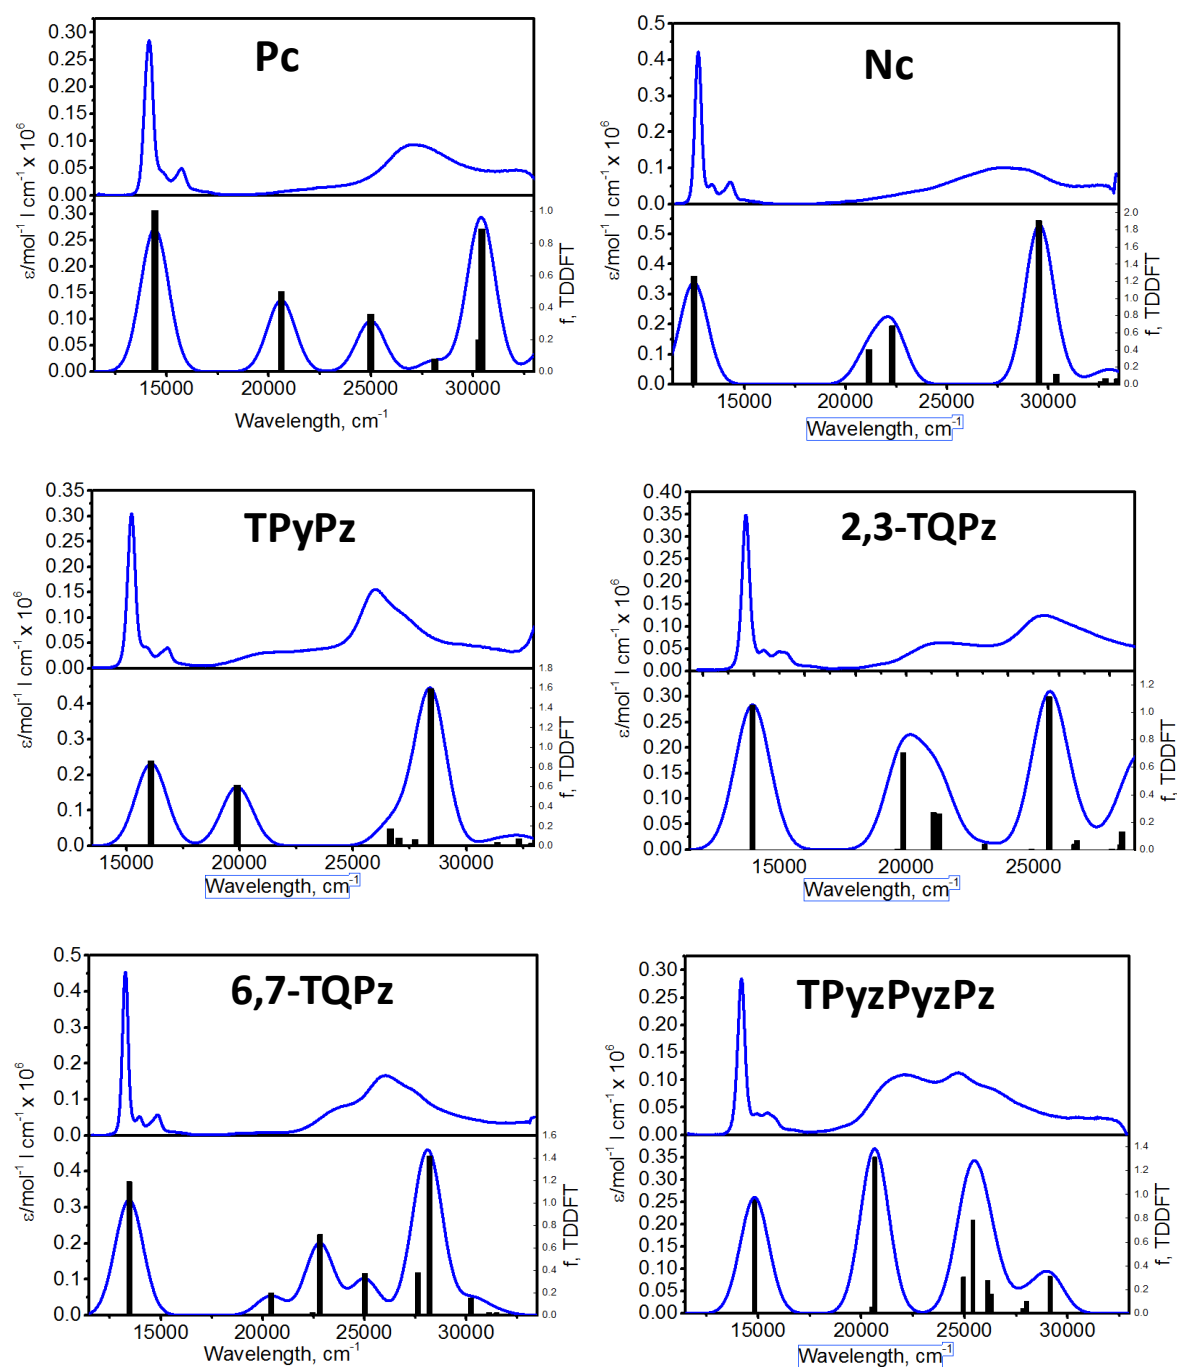

**Figure S23.** TDDFT-PCM predicted and experimentally observed energies in target compounds.

## Optimized geometries for target compounds

Optimized geometries for Pc:

Standard orientation:

| Center<br>Number | Atomic<br>Number | Atomic<br>Type | Coordinates (Angstroms) |           |          |
|------------------|------------------|----------------|-------------------------|-----------|----------|
|                  |                  |                | X                       | Y         | Z        |
| 1                | 7                | 0              | 0.000000                | 1.996184  | 0.000000 |
| 2                | 7                | 0              | 1.996184                | 0.000000  | 0.000000 |
| 3                | 7                | 0              | -1.996184               | 0.000000  | 0.000000 |
| 4                | 7                | 0              | 0.000000                | -1.996184 | 0.000000 |
| 5                | 6                | 0              | 1.120211                | 2.787148  | 0.000000 |
| 6                | 6                | 0              | -1.120211               | 2.787148  | 0.000000 |
| 7                | 6                | 0              | 2.787148                | 1.120211  | 0.000000 |
| 8                | 6                | 0              | 2.787148                | -1.120211 | 0.000000 |
| 9                | 6                | 0              | -2.787148               | 1.120211  | 0.000000 |
| 10               | 6                | 0              | -2.787148               | -1.120211 | 0.000000 |
| 11               | 6                | 0              | 1.120211                | -2.787148 | 0.000000 |
| 12               | 6                | 0              | -1.120211               | -2.787148 | 0.000000 |
| 13               | 7                | 0              | 2.392734                | 2.392734  | 0.000000 |
| 14               | 6                | 0              | 0.702929                | 4.186755  | 0.000000 |
| 15               | 6                | 0              | -0.702929               | 4.186755  | 0.000000 |
| 16               | 6                | 0              | 4.186755                | 0.702929  | 0.000000 |
| 17               | 7                | 0              | 2.392734                | -2.392734 | 0.000000 |
| 18               | 6                | 0              | 4.186755                | -0.702929 | 0.000000 |
| 19               | 7                | 0              | -2.392734               | 2.392734  | 0.000000 |
| 20               | 6                | 0              | -4.186755               | 0.702929  | 0.000000 |
| 21               | 6                | 0              | -4.186755               | -0.702929 | 0.000000 |
| 22               | 6                | 0              | 0.702929                | -4.186755 | 0.000000 |
| 23               | 7                | 0              | -2.392734               | -2.392734 | 0.000000 |
| 24               | 6                | 0              | -0.702929               | -4.186755 | 0.000000 |
| 25               | 6                | 0              | 0.716675                | 6.590771  | 0.000000 |
| 26               | 6                | 0              | -0.716675               | 6.590771  | 0.000000 |
| 27               | 6                | 0              | -6.590771               | 0.716675  | 0.000000 |
| 28               | 6                | 0              | -6.590771               | -0.716675 | 0.000000 |
| 29               | 6                | 0              | -0.716675               | -6.590771 | 0.000000 |
| 30               | 6                | 0              | 0.716675                | -6.590771 | 0.000000 |
| 31               | 6                | 0              | 6.590771                | -0.716675 | 0.000000 |
| 32               | 6                | 0              | 6.590771                | 0.716675  | 0.000000 |
| 33               | 30               | 0              | 0.000000                | 0.000000  | 0.000000 |
| 34               | 6                | 0              | 1.418862                | 5.382357  | 0.000000 |
| 35               | 1                | 0              | 2.501555                | 5.359451  | 0.000000 |
| 36               | 6                | 0              | -1.418862               | 5.382357  | 0.000000 |
| 37               | 1                | 0              | -2.501555               | 5.359451  | 0.000000 |
| 38               | 6                | 0              | -5.382357               | 1.418862  | 0.000000 |
| 39               | 1                | 0              | -5.359451               | 2.501555  | 0.000000 |
| 40               | 6                | 0              | -5.382357               | -1.418862 | 0.000000 |
| 41               | 1                | 0              | -5.359451               | -2.501555 | 0.000000 |
| 42               | 6                | 0              | -1.418862               | -5.382357 | 0.000000 |
| 43               | 1                | 0              | -2.501555               | -5.359451 | 0.000000 |
| 44               | 6                | 0              | 1.418862                | -5.382357 | 0.000000 |
| 45               | 1                | 0              | 2.501555                | -5.359451 | 0.000000 |
| 46               | 6                | 0              | 5.382357                | -1.418862 | 0.000000 |
| 47               | 1                | 0              | 5.359451                | -2.501555 | 0.000000 |
| 48               | 6                | 0              | 5.382357                | 1.418862  | 0.000000 |
| 49               | 1                | 0              | 5.359451                | 2.501555  | 0.000000 |
| 50               | 16               | 0              | 1.539373                | 8.175683  | 0.000000 |
| 51               | 16               | 0              | -1.539373               | 8.175683  | 0.000000 |

|    |    |   |           |           |           |
|----|----|---|-----------|-----------|-----------|
| 52 | 16 | 0 | -8.175683 | 1.539373  | 0.000000  |
| 53 | 16 | 0 | -8.175683 | -1.539373 | 0.000000  |
| 54 | 16 | 0 | -1.539373 | -8.175683 | 0.000000  |
| 55 | 16 | 0 | 1.539373  | -8.175683 | 0.000000  |
| 56 | 16 | 0 | 8.175683  | -1.539373 | 0.000000  |
| 57 | 16 | 0 | 8.175683  | 1.539373  | 0.000000  |
| 58 | 6  | 0 | -3.311636 | -7.744501 | 0.000000  |
| 59 | 1  | 0 | -3.587456 | -7.186448 | 0.897735  |
| 60 | 1  | 0 | -3.587456 | -7.186448 | -0.897735 |
| 61 | 1  | 0 | -3.837024 | -8.702318 | 0.000000  |
| 62 | 6  | 0 | 3.311636  | -7.744501 | 0.000000  |
| 63 | 1  | 0 | 3.587456  | -7.186448 | -0.897735 |
| 64 | 1  | 0 | 3.587456  | -7.186448 | 0.897735  |
| 65 | 1  | 0 | 3.837024  | -8.702318 | 0.000000  |
| 66 | 6  | 0 | 7.744501  | -3.311636 | 0.000000  |
| 67 | 1  | 0 | 7.186448  | -3.587456 | 0.897735  |
| 68 | 1  | 0 | 7.186448  | -3.587456 | -0.897735 |
| 69 | 1  | 0 | 8.702318  | -3.837024 | 0.000000  |
| 70 | 6  | 0 | 7.744501  | 3.311636  | 0.000000  |
| 71 | 1  | 0 | 7.186448  | 3.587456  | -0.897735 |
| 72 | 1  | 0 | 7.186448  | 3.587456  | 0.897735  |
| 73 | 1  | 0 | 8.702318  | 3.837024  | 0.000000  |
| 74 | 6  | 0 | 3.311636  | 7.744501  | 0.000000  |
| 75 | 1  | 0 | 3.587456  | 7.186448  | 0.897735  |
| 76 | 1  | 0 | 3.587456  | 7.186448  | -0.897735 |
| 77 | 1  | 0 | 3.837024  | 8.702318  | 0.000000  |
| 78 | 6  | 0 | -3.311636 | 7.744501  | 0.000000  |
| 79 | 1  | 0 | -3.587456 | 7.186448  | -0.897735 |
| 80 | 1  | 0 | -3.587456 | 7.186448  | 0.897735  |
| 81 | 1  | 0 | -3.837024 | 8.702318  | 0.000000  |
| 82 | 6  | 0 | -7.744501 | 3.311636  | 0.000000  |
| 83 | 1  | 0 | -7.186448 | 3.587456  | 0.897735  |
| 84 | 1  | 0 | -7.186448 | 3.587456  | -0.897735 |
| 85 | 1  | 0 | -8.702318 | 3.837024  | 0.000000  |
| 86 | 6  | 0 | -7.744501 | -3.311636 | 0.000000  |
| 87 | 1  | 0 | -7.186448 | -3.587456 | -0.897735 |
| 88 | 1  | 0 | -7.186448 | -3.587456 | 0.897735  |
| 89 | 1  | 0 | -8.702318 | -3.837024 | 0.000000  |

-----

Optimized geometries for TPyPz:

| Center<br>Number | Atomic<br>Number | Atomic<br>Type | Coordinates (Angstroms) |           |          |
|------------------|------------------|----------------|-------------------------|-----------|----------|
|                  |                  |                | X                       | Y         | Z        |
| 1                | 7                | 0              | 0.000000                | 2.001853  | 0.000000 |
| 2                | 7                | 0              | 2.001853                | 0.000000  | 0.000000 |
| 3                | 7                | 0              | -2.001853               | 0.000000  | 0.000000 |
| 4                | 7                | 0              | 0.000000                | -2.001853 | 0.000000 |
| 5                | 6                | 0              | 1.124911                | 2.787276  | 0.000000 |
| 6                | 6                | 0              | -1.124911               | 2.787276  | 0.000000 |
| 7                | 6                | 0              | 2.787276                | 1.124911  | 0.000000 |
| 8                | 6                | 0              | 2.787276                | -1.124911 | 0.000000 |
| 9                | 6                | 0              | -2.787276               | 1.124911  | 0.000000 |
| 10               | 6                | 0              | -2.787276               | -1.124911 | 0.000000 |
| 11               | 6                | 0              | 1.124911                | -2.787276 | 0.000000 |
| 12               | 6                | 0              | -1.124911               | -2.787276 | 0.000000 |
| 13               | 7                | 0              | 2.394608                | 2.394608  | 0.000000 |

|    |    |   |           |           |           |
|----|----|---|-----------|-----------|-----------|
| 14 | 6  | 0 | 0.698970  | 4.186073  | 0.000000  |
| 15 | 6  | 0 | -0.698970 | 4.186073  | 0.000000  |
| 16 | 6  | 0 | 4.186073  | 0.698970  | 0.000000  |
| 17 | 7  | 0 | 2.394608  | -2.394608 | 0.000000  |
| 18 | 6  | 0 | 4.186073  | -0.698970 | 0.000000  |
| 19 | 7  | 0 | -2.394608 | 2.394608  | 0.000000  |
| 20 | 6  | 0 | -4.186073 | 0.698970  | 0.000000  |
| 21 | 6  | 0 | -4.186073 | -0.698970 | 0.000000  |
| 22 | 6  | 0 | 0.698970  | -4.186073 | 0.000000  |
| 23 | 7  | 0 | -2.394608 | -2.394608 | 0.000000  |
| 24 | 6  | 0 | -0.698970 | -4.186073 | 0.000000  |
| 25 | 6  | 0 | 0.724578  | 6.439305  | 0.000000  |
| 26 | 6  | 0 | -0.724578 | 6.439305  | 0.000000  |
| 27 | 6  | 0 | -6.439305 | 0.724578  | 0.000000  |
| 28 | 6  | 0 | -6.439305 | -0.724578 | 0.000000  |
| 29 | 6  | 0 | -0.724578 | -6.439305 | 0.000000  |
| 30 | 6  | 0 | 0.724578  | -6.439305 | 0.000000  |
| 31 | 6  | 0 | 6.439305  | -0.724578 | 0.000000  |
| 32 | 6  | 0 | 6.439305  | 0.724578  | 0.000000  |
| 33 | 30 | 0 | 0.000000  | 0.000000  | 0.000000  |
| 34 | 16 | 0 | 1.576584  | 7.994266  | 0.000000  |
| 35 | 16 | 0 | -1.576584 | 7.994266  | 0.000000  |
| 36 | 16 | 0 | -7.994266 | 1.576584  | 0.000000  |
| 37 | 16 | 0 | -7.994266 | -1.576584 | 0.000000  |
| 38 | 16 | 0 | -1.576584 | -7.994266 | 0.000000  |
| 39 | 16 | 0 | 1.576584  | -7.994266 | 0.000000  |
| 40 | 16 | 0 | 7.994266  | -1.576584 | 0.000000  |
| 41 | 16 | 0 | 7.994266  | 1.576584  | 0.000000  |
| 42 | 6  | 0 | -3.319022 | -7.448748 | 0.000000  |
| 43 | 1  | 0 | -3.536671 | -6.861949 | 0.893274  |
| 44 | 1  | 0 | -3.536671 | -6.861949 | -0.893274 |
| 45 | 1  | 0 | -3.910138 | -8.367190 | 0.000000  |
| 46 | 6  | 0 | 3.319022  | -7.448748 | 0.000000  |
| 47 | 1  | 0 | 3.536671  | -6.861949 | -0.893274 |
| 48 | 1  | 0 | 3.536671  | -6.861949 | 0.893274  |
| 49 | 1  | 0 | 3.910138  | -8.367190 | 0.000000  |
| 50 | 6  | 0 | 7.448748  | -3.319022 | 0.000000  |
| 51 | 1  | 0 | 6.861949  | -3.536671 | 0.893274  |
| 52 | 1  | 0 | 6.861949  | -3.536671 | -0.893274 |
| 53 | 1  | 0 | 8.367190  | -3.910138 | 0.000000  |
| 54 | 6  | 0 | 7.448748  | 3.319022  | 0.000000  |
| 55 | 1  | 0 | 6.861949  | 3.536671  | -0.893274 |
| 56 | 1  | 0 | 6.861949  | 3.536671  | 0.893274  |
| 57 | 1  | 0 | 8.367190  | 3.910138  | 0.000000  |
| 58 | 6  | 0 | 3.319022  | 7.448748  | 0.000000  |
| 59 | 1  | 0 | 3.536671  | 6.861949  | 0.893274  |
| 60 | 1  | 0 | 3.536671  | 6.861949  | -0.893274 |
| 61 | 1  | 0 | 3.910138  | 8.367190  | 0.000000  |
| 62 | 6  | 0 | -3.319022 | 7.448748  | 0.000000  |
| 63 | 1  | 0 | -3.536671 | 6.861949  | -0.893274 |
| 64 | 1  | 0 | -3.536671 | 6.861949  | 0.893274  |
| 65 | 1  | 0 | -3.910138 | 8.367190  | 0.000000  |
| 66 | 6  | 0 | -7.448748 | 3.319022  | 0.000000  |
| 67 | 1  | 0 | -6.861949 | 3.536671  | 0.893274  |
| 68 | 1  | 0 | -6.861949 | 3.536671  | -0.893274 |
| 69 | 1  | 0 | -8.367190 | 3.910138  | 0.000000  |
| 70 | 6  | 0 | -7.448748 | -3.319022 | 0.000000  |
| 71 | 1  | 0 | -6.861949 | -3.536671 | -0.893274 |
| 72 | 1  | 0 | -6.861949 | -3.536671 | 0.893274  |
| 73 | 1  | 0 | -8.367190 | -3.910138 | 0.000000  |

|    |   |   |           |           |          |
|----|---|---|-----------|-----------|----------|
| 74 | 7 | 0 | -1.426189 | -5.314109 | 0.000000 |
| 75 | 7 | 0 | 1.426189  | -5.314109 | 0.000000 |
| 76 | 7 | 0 | 5.314109  | -1.426189 | 0.000000 |
| 77 | 7 | 0 | 5.314109  | 1.426189  | 0.000000 |
| 78 | 7 | 0 | 1.426189  | 5.314109  | 0.000000 |
| 79 | 7 | 0 | -1.426189 | 5.314109  | 0.000000 |
| 80 | 7 | 0 | -5.314109 | 1.426189  | 0.000000 |
| 81 | 7 | 0 | -5.314109 | -1.426189 | 0.000000 |

-----  
Optimized structures for Nc:

| Center<br>Number | Atomic<br>Number | Atomic<br>Type | Coordinates (Angstroms) |           |          |
|------------------|------------------|----------------|-------------------------|-----------|----------|
|                  |                  |                | X                       | Y         | Z        |
| 1                | 7                | 0              | 0.000000                | 2.003379  | 0.000000 |
| 2                | 7                | 0              | 2.003379                | 0.000000  | 0.000000 |
| 3                | 7                | 0              | -2.003379               | 0.000000  | 0.000000 |
| 4                | 7                | 0              | 0.000000                | -2.003379 | 0.000000 |
| 5                | 6                | 0              | 1.122910                | 2.790646  | 0.000000 |
| 6                | 6                | 0              | -1.122910               | 2.790646  | 0.000000 |
| 7                | 6                | 0              | 2.790646                | 1.122910  | 0.000000 |
| 8                | 6                | 0              | 2.790646                | -1.122910 | 0.000000 |
| 9                | 6                | 0              | -2.790646               | 1.122910  | 0.000000 |
| 10               | 6                | 0              | -2.790646               | -1.122910 | 0.000000 |
| 11               | 6                | 0              | 1.122910                | -2.790646 | 0.000000 |
| 12               | 6                | 0              | -1.122910               | -2.790646 | 0.000000 |
| 13               | 7                | 0              | 2.393838                | 2.393838  | 0.000000 |
| 14               | 6                | 0              | 0.713759                | 4.193756  | 0.000000 |
| 15               | 6                | 0              | -0.713759               | 4.193756  | 0.000000 |
| 16               | 6                | 0              | 4.193756                | 0.713759  | 0.000000 |
| 17               | 7                | 0              | 2.393838                | -2.393838 | 0.000000 |
| 18               | 6                | 0              | 4.193756                | -0.713759 | 0.000000 |
| 19               | 7                | 0              | -2.393838               | 2.393838  | 0.000000 |
| 20               | 6                | 0              | -4.193756               | 0.713759  | 0.000000 |
| 21               | 6                | 0              | -4.193756               | -0.713759 | 0.000000 |
| 22               | 6                | 0              | 0.713759                | -4.193756 | 0.000000 |
| 23               | 7                | 0              | -2.393838               | -2.393838 | 0.000000 |
| 24               | 6                | 0              | -0.713759               | -4.193756 | 0.000000 |
| 25               | 6                | 0              | 0.719652                | 6.599800  | 0.000000 |
| 26               | 6                | 0              | -0.719652               | 6.599800  | 0.000000 |
| 27               | 6                | 0              | -6.599800               | 0.719652  | 0.000000 |
| 28               | 6                | 0              | -6.599800               | -0.719652 | 0.000000 |
| 29               | 6                | 0              | -0.719652               | -6.599800 | 0.000000 |
| 30               | 6                | 0              | 0.719652                | -6.599800 | 0.000000 |
| 31               | 6                | 0              | 6.599800                | -0.719652 | 0.000000 |
| 32               | 6                | 0              | 6.599800                | 0.719652  | 0.000000 |
| 33               | 6                | 0              | 9.050694                | -0.721699 | 0.000000 |
| 34               | 6                | 0              | 9.050694                | 0.721699  | 0.000000 |
| 35               | 6                | 0              | -9.050694               | -0.721699 | 0.000000 |
| 36               | 6                | 0              | -9.050694               | 0.721699  | 0.000000 |
| 37               | 6                | 0              | 0.721699                | -9.050694 | 0.000000 |
| 38               | 6                | 0              | -0.721699               | -9.050694 | 0.000000 |
| 39               | 6                | 0              | 0.721699                | 9.050694  | 0.000000 |
| 40               | 6                | 0              | -0.721699               | 9.050694  | 0.000000 |
| 41               | 30               | 0              | 0.000000                | 0.000000  | 0.000000 |
| 42               | 16               | 0              | -10.634565              | 1.544777  | 0.000000 |
| 43               | 16               | 0              | -10.634565              | -1.544777 | 0.000000 |
| 44               | 16               | 0              | -1.544777               | 10.634565 | 0.000000 |

|     |    |   |            |            |           |
|-----|----|---|------------|------------|-----------|
| 45  | 16 | 0 | 1.544777   | 10.634565  | 0.000000  |
| 46  | 16 | 0 | 10.634565  | 1.544777   | 0.000000  |
| 47  | 16 | 0 | 10.634565  | -1.544777  | 0.000000  |
| 48  | 16 | 0 | -1.544777  | -10.634565 | 0.000000  |
| 49  | 16 | 0 | 1.544777   | -10.634565 | 0.000000  |
| 50  | 6  | 0 | 10.198073  | -3.315115  | 0.000000  |
| 51  | 1  | 0 | 9.637940   | -3.587730  | 0.897548  |
| 52  | 1  | 0 | 9.637940   | -3.587730  | -0.897548 |
| 53  | 1  | 0 | 11.153125  | -3.845426  | 0.000000  |
| 54  | 6  | 0 | 10.198073  | 3.315115   | 0.000000  |
| 55  | 1  | 0 | 9.637940   | 3.587730   | -0.897548 |
| 56  | 1  | 0 | 9.637940   | 3.587730   | 0.897548  |
| 57  | 1  | 0 | 11.153125  | 3.845426   | 0.000000  |
| 58  | 6  | 0 | 3.315115   | -10.198073 | 0.000000  |
| 59  | 1  | 0 | 3.587730   | -9.637940  | -0.897548 |
| 60  | 1  | 0 | 3.587730   | -9.637940  | 0.897548  |
| 61  | 1  | 0 | 3.845426   | -11.153125 | 0.000000  |
| 62  | 6  | 0 | -3.315115  | -10.198073 | 0.000000  |
| 63  | 1  | 0 | -3.587730  | -9.637940  | 0.897548  |
| 64  | 1  | 0 | -3.587730  | -9.637940  | -0.897548 |
| 65  | 1  | 0 | -3.845426  | -11.153125 | 0.000000  |
| 66  | 6  | 0 | -10.198073 | -3.315115  | 0.000000  |
| 67  | 1  | 0 | -9.637940  | -3.587730  | -0.897548 |
| 68  | 1  | 0 | -9.637940  | -3.587730  | 0.897548  |
| 69  | 1  | 0 | -11.153125 | -3.845426  | 0.000000  |
| 70  | 6  | 0 | -10.198073 | 3.315115   | 0.000000  |
| 71  | 1  | 0 | -9.637940  | 3.587730   | 0.897548  |
| 72  | 1  | 0 | -9.637940  | 3.587730   | -0.897548 |
| 73  | 1  | 0 | -11.153125 | 3.845426   | 0.000000  |
| 74  | 6  | 0 | -3.315115  | 10.198073  | 0.000000  |
| 75  | 1  | 0 | -3.587730  | 9.637940   | -0.897548 |
| 76  | 1  | 0 | -3.587730  | 9.637940   | 0.897548  |
| 77  | 1  | 0 | -3.845426  | 11.153125  | 0.000000  |
| 78  | 6  | 0 | 3.315115   | 10.198073  | 0.000000  |
| 79  | 1  | 0 | 3.587730   | 9.637940   | 0.897548  |
| 80  | 1  | 0 | 3.587730   | 9.637940   | -0.897548 |
| 81  | 1  | 0 | 3.845426   | 11.153125  | 0.000000  |
| 82  | 6  | 0 | 1.429160   | 5.371913   | 0.000000  |
| 83  | 1  | 0 | 2.515606   | 5.369868   | 0.000000  |
| 84  | 6  | 0 | -1.429160  | 5.371913   | 0.000000  |
| 85  | 1  | 0 | -2.515606  | 5.369868   | 0.000000  |
| 86  | 6  | 0 | -5.371913  | 1.429160   | 0.000000  |
| 87  | 1  | 0 | -5.369868  | 2.515606   | 0.000000  |
| 88  | 6  | 0 | -5.371913  | -1.429160  | 0.000000  |
| 89  | 1  | 0 | -5.369868  | -2.515606  | 0.000000  |
| 90  | 6  | 0 | -1.429160  | -5.371913  | 0.000000  |
| 91  | 1  | 0 | -2.515606  | -5.369868  | 0.000000  |
| 92  | 6  | 0 | 1.429160   | -5.371913  | 0.000000  |
| 93  | 1  | 0 | 2.515606   | -5.369868  | 0.000000  |
| 94  | 6  | 0 | 5.371913   | -1.429160  | 0.000000  |
| 95  | 1  | 0 | 5.369868   | -2.515606  | 0.000000  |
| 96  | 6  | 0 | 5.371913   | 1.429160   | 0.000000  |
| 97  | 1  | 0 | 5.369868   | 2.515606   | 0.000000  |
| 98  | 6  | 0 | -1.397882  | 7.848536   | 0.000000  |
| 99  | 1  | 0 | -2.481740  | 7.828415   | 0.000000  |
| 100 | 6  | 0 | 1.397882   | 7.848536   | 0.000000  |
| 101 | 1  | 0 | 2.481740   | 7.828415   | 0.000000  |
| 102 | 6  | 0 | -7.848536  | 1.397882   | 0.000000  |
| 103 | 1  | 0 | -7.828415  | 2.481740   | 0.000000  |
| 104 | 6  | 0 | -7.848536  | -1.397882  | 0.000000  |

|     |   |   |           |           |          |
|-----|---|---|-----------|-----------|----------|
| 105 | 1 | 0 | -7.828415 | -2.481740 | 0.000000 |
| 106 | 6 | 0 | -1.397882 | -7.848536 | 0.000000 |
| 107 | 1 | 0 | -2.481740 | -7.828415 | 0.000000 |
| 108 | 6 | 0 | 1.397882  | -7.848536 | 0.000000 |
| 109 | 1 | 0 | 2.481740  | -7.828415 | 0.000000 |
| 110 | 6 | 0 | 7.848536  | -1.397882 | 0.000000 |
| 111 | 1 | 0 | 7.828415  | -2.481740 | 0.000000 |
| 112 | 6 | 0 | 7.848536  | 1.397882  | 0.000000 |
| 113 | 1 | 0 | 7.828415  | 2.481740  | 0.000000 |

Optimized structures for TPyzPzPz:

| Center Number | Atomic Number | Atomic Type | Coordinates (Angstroms) |           |          |
|---------------|---------------|-------------|-------------------------|-----------|----------|
|               |               |             | X                       | Y         | Z        |
| 1             | 7             | 0           | 0.000000                | 2.010455  | 0.000000 |
| 2             | 7             | 0           | 2.010455                | 0.000000  | 0.000000 |
| 3             | 7             | 0           | -2.010455               | 0.000000  | 0.000000 |
| 4             | 7             | 0           | 0.000000                | -2.010455 | 0.000000 |
| 5             | 6             | 0           | 1.127359                | 2.789280  | 0.000000 |
| 6             | 6             | 0           | -1.127359               | 2.789280  | 0.000000 |
| 7             | 6             | 0           | 2.789280                | 1.127359  | 0.000000 |
| 8             | 6             | 0           | 2.789280                | -1.127359 | 0.000000 |
| 9             | 6             | 0           | -2.789280               | 1.127359  | 0.000000 |
| 10            | 6             | 0           | -2.789280               | -1.127359 | 0.000000 |
| 11            | 6             | 0           | 1.127359                | -2.789280 | 0.000000 |
| 12            | 6             | 0           | -1.127359               | -2.789280 | 0.000000 |
| 13            | 7             | 0           | 2.394168                | 2.394168  | 0.000000 |
| 14            | 6             | 0           | 0.711571                | 4.195644  | 0.000000 |
| 15            | 6             | 0           | -0.711571               | 4.195644  | 0.000000 |
| 16            | 6             | 0           | 4.195644                | 0.711571  | 0.000000 |
| 17            | 7             | 0           | 2.394168                | -2.394168 | 0.000000 |
| 18            | 6             | 0           | 4.195644                | -0.711571 | 0.000000 |
| 19            | 7             | 0           | -2.394168               | 2.394168  | 0.000000 |
| 20            | 6             | 0           | -4.195644               | 0.711571  | 0.000000 |
| 21            | 6             | 0           | -4.195644               | -0.711571 | 0.000000 |
| 22            | 6             | 0           | 0.711571                | -4.195644 | 0.000000 |
| 23            | 7             | 0           | -2.394168               | -2.394168 | 0.000000 |
| 24            | 6             | 0           | -0.711571               | -4.195644 | 0.000000 |
| 25            | 6             | 0           | 0.720462                | 6.433651  | 0.000000 |
| 26            | 6             | 0           | -0.720462               | 6.433651  | 0.000000 |
| 27            | 6             | 0           | -6.433651               | 0.720462  | 0.000000 |
| 28            | 6             | 0           | -6.433651               | -0.720462 | 0.000000 |
| 29            | 6             | 0           | -0.720462               | -6.433651 | 0.000000 |
| 30            | 6             | 0           | 0.720462                | -6.433651 | 0.000000 |
| 31            | 6             | 0           | 6.433651                | -0.720462 | 0.000000 |
| 32            | 6             | 0           | 6.433651                | 0.720462  | 0.000000 |
| 33            | 6             | 0           | 8.727207                | -0.732446 | 0.000000 |
| 34            | 6             | 0           | 8.727207                | 0.732446  | 0.000000 |
| 35            | 6             | 0           | -8.727207               | -0.732446 | 0.000000 |
| 36            | 6             | 0           | -8.727207               | 0.732446  | 0.000000 |
| 37            | 6             | 0           | 0.732446                | -8.727207 | 0.000000 |
| 38            | 6             | 0           | -0.732446               | -8.727207 | 0.000000 |
| 39            | 6             | 0           | 0.732446                | 8.727207  | 0.000000 |
| 40            | 6             | 0           | -0.732446               | 8.727207  | 0.000000 |
| 41            | 30            | 0           | 0.000000                | 0.000000  | 0.000000 |
| 42            | 16            | 0           | -10.277014              | 1.579871  | 0.000000 |
| 43            | 16            | 0           | -10.277014              | -1.579871 | 0.000000 |



|    |    |   |            |            |           |
|----|----|---|------------|------------|-----------|
| 44 | 16 | 0 | -1.579871  | 10.277014  | 0.000000  |
| 45 | 16 | 0 | 1.579871   | 10.277014  | 0.000000  |
| 46 | 16 | 0 | 10.277014  | 1.579871   | 0.000000  |
| 47 | 16 | 0 | 10.277014  | -1.579871  | 0.000000  |
| 48 | 16 | 0 | -1.579871  | -10.277014 | 0.000000  |
| 49 | 16 | 0 | 1.579871   | -10.277014 | 0.000000  |
| 50 | 6  | 0 | 9.729076   | -3.321062  | 0.000000  |
| 51 | 1  | 0 | 9.141292   | -3.534338  | 0.893658  |
| 52 | 1  | 0 | 9.141292   | -3.534338  | -0.893658 |
| 53 | 1  | 0 | 10.645754  | -3.914522  | 0.000000  |
| 54 | 6  | 0 | 9.729076   | 3.321062   | 0.000000  |
| 55 | 1  | 0 | 9.141292   | 3.534338   | -0.893658 |
| 56 | 1  | 0 | 9.141292   | 3.534338   | 0.893658  |
| 57 | 1  | 0 | 10.645754  | 3.914522   | 0.000000  |
| 58 | 6  | 0 | 3.321062   | -9.729076  | 0.000000  |
| 59 | 1  | 0 | 3.534338   | -9.141292  | -0.893658 |
| 60 | 1  | 0 | 3.534338   | -9.141292  | 0.893658  |
| 61 | 1  | 0 | 3.914522   | -10.645754 | 0.000000  |
| 62 | 6  | 0 | -3.321062  | -9.729076  | 0.000000  |
| 63 | 1  | 0 | -3.534338  | -9.141292  | 0.893658  |
| 64 | 1  | 0 | -3.534338  | -9.141292  | -0.893658 |
| 65 | 1  | 0 | -3.914522  | -10.645754 | 0.000000  |
| 66 | 6  | 0 | -9.729076  | -3.321062  | 0.000000  |
| 67 | 1  | 0 | -9.141292  | -3.534338  | -0.893658 |
| 68 | 1  | 0 | -9.141292  | -3.534338  | 0.893658  |
| 69 | 1  | 0 | -10.645754 | -3.914522  | 0.000000  |
| 70 | 6  | 0 | -9.729076  | 3.321062   | 0.000000  |
| 71 | 1  | 0 | -9.141292  | 3.534338   | 0.893658  |
| 72 | 1  | 0 | -9.141292  | 3.534338   | -0.893658 |
| 73 | 1  | 0 | -10.645754 | 3.914522   | 0.000000  |
| 74 | 6  | 0 | -3.321062  | 9.729076   | 0.000000  |
| 75 | 1  | 0 | -3.534338  | 9.141292   | -0.893658 |
| 76 | 1  | 0 | -3.534338  | 9.141292   | 0.893658  |
| 77 | 1  | 0 | -3.914522  | 10.645754  | 0.000000  |
| 78 | 6  | 0 | 3.321062   | 9.729076   | 0.000000  |
| 79 | 1  | 0 | 3.534338   | 9.141292   | 0.893658  |
| 80 | 1  | 0 | 3.534338   | 9.141292   | -0.893658 |
| 81 | 1  | 0 | 3.914522   | 10.645754  | 0.000000  |
| 82 | 7  | 0 | 7.610009   | -1.410631  | 0.000000  |
| 83 | 7  | 0 | 7.610009   | 1.410631   | 0.000000  |
| 84 | 7  | 0 | 5.294905   | 1.447253   | 0.000000  |
| 85 | 7  | 0 | 5.294905   | -1.447253  | 0.000000  |
| 86 | 7  | 0 | 1.410631   | -7.610009  | 0.000000  |
| 87 | 7  | 0 | -1.410631  | -7.610009  | 0.000000  |
| 88 | 7  | 0 | 1.447253   | -5.294905  | 0.000000  |
| 89 | 7  | 0 | -1.447253  | -5.294905  | 0.000000  |
| 90 | 7  | 0 | -5.294905  | -1.447253  | 0.000000  |
| 91 | 7  | 0 | -5.294905  | 1.447253   | 0.000000  |
| 92 | 7  | 0 | -7.610009  | 1.410631   | 0.000000  |
| 93 | 7  | 0 | -7.610009  | -1.410631  | 0.000000  |
| 94 | 7  | 0 | -1.447253  | 5.294905   | 0.000000  |
| 95 | 7  | 0 | 1.447253   | 5.294905   | 0.000000  |
| 96 | 7  | 0 | 1.410631   | 7.610009   | 0.000000  |
| 97 | 7  | 0 | -1.410631  | 7.610009   | 0.000000  |

-----  
Optimized structures for 2,3-TQPz  
-----

| Center<br>Number | Atomic<br>Number | Atomic<br>Type | Coordinates (Angstroms) |            |           |
|------------------|------------------|----------------|-------------------------|------------|-----------|
|                  |                  |                | X                       | Y          | Z         |
| 1                | 7                | 0              | 0.000000                | 2.011162   | 0.000000  |
| 2                | 7                | 0              | 2.011162                | 0.000000   | 0.000000  |
| 3                | 7                | 0              | -2.011162               | 0.000000   | 0.000000  |
| 4                | 7                | 0              | 0.000000                | -2.011162  | 0.000000  |
| 5                | 6                | 0              | 1.127927                | 2.790988   | 0.000000  |
| 6                | 6                | 0              | -1.127927               | 2.790988   | 0.000000  |
| 7                | 6                | 0              | 2.790988                | 1.127927   | 0.000000  |
| 8                | 6                | 0              | 2.790988                | -1.127927  | 0.000000  |
| 9                | 6                | 0              | -2.790988               | 1.127927   | 0.000000  |
| 10               | 6                | 0              | -2.790988               | -1.127927  | 0.000000  |
| 11               | 6                | 0              | 1.127927                | -2.790988  | 0.000000  |
| 12               | 6                | 0              | -1.127927               | -2.790988  | 0.000000  |
| 13               | 7                | 0              | 2.394928                | 2.394928   | 0.000000  |
| 14               | 6                | 0              | 0.713172                | 4.197295   | 0.000000  |
| 15               | 6                | 0              | -0.713172               | 4.197295   | 0.000000  |
| 16               | 6                | 0              | 4.197295                | 0.713172   | 0.000000  |
| 17               | 7                | 0              | 2.394928                | -2.394928  | 0.000000  |
| 18               | 6                | 0              | 4.197295                | -0.713172  | 0.000000  |
| 19               | 7                | 0              | -2.394928               | 2.394928   | 0.000000  |
| 20               | 6                | 0              | -4.197295               | 0.713172   | 0.000000  |
| 21               | 6                | 0              | -4.197295               | -0.713172  | 0.000000  |
| 22               | 6                | 0              | 0.713172                | -4.197295  | 0.000000  |
| 23               | 7                | 0              | -2.394928               | -2.394928  | 0.000000  |
| 24               | 6                | 0              | -0.713172               | -4.197295  | 0.000000  |
| 25               | 6                | 0              | 0.721137                | 6.445484   | 0.000000  |
| 26               | 6                | 0              | -0.721137               | 6.445484   | 0.000000  |
| 27               | 6                | 0              | -6.445484               | 0.721137   | 0.000000  |
| 28               | 6                | 0              | -6.445484               | -0.721137  | 0.000000  |
| 29               | 6                | 0              | -0.721137               | -6.445484  | 0.000000  |
| 30               | 6                | 0              | 0.721137                | -6.445484  | 0.000000  |
| 31               | 6                | 0              | 6.445484                | -0.721137  | 0.000000  |
| 32               | 6                | 0              | 6.445484                | 0.721137   | 0.000000  |
| 33               | 6                | 0              | 8.886711                | -0.724326  | 0.000000  |
| 34               | 6                | 0              | 8.886711                | 0.724326   | 0.000000  |
| 35               | 6                | 0              | -8.886711               | -0.724326  | 0.000000  |
| 36               | 6                | 0              | -8.886711               | 0.724326   | 0.000000  |
| 37               | 6                | 0              | 0.724326                | -8.886711  | 0.000000  |
| 38               | 6                | 0              | -0.724326               | -8.886711  | 0.000000  |
| 39               | 6                | 0              | 0.724326                | 8.886711   | 0.000000  |
| 40               | 6                | 0              | -0.724326               | 8.886711   | 0.000000  |
| 41               | 30               | 0              | 0.000000                | 0.000000   | 0.000000  |
| 42               | 16               | 0              | -10.465671              | 1.541938   | 0.000000  |
| 43               | 16               | 0              | -10.465671              | -1.541938  | 0.000000  |
| 44               | 16               | 0              | -1.541938               | 10.465671  | 0.000000  |
| 45               | 16               | 0              | 1.541938                | 10.465671  | 0.000000  |
| 46               | 16               | 0              | 10.465671               | 1.541938   | 0.000000  |
| 47               | 16               | 0              | 10.465671               | -1.541938  | 0.000000  |
| 48               | 16               | 0              | -1.541938               | -10.465671 | 0.000000  |
| 49               | 16               | 0              | 1.541938                | -10.465671 | 0.000000  |
| 50               | 6                | 0              | 10.030484               | -3.312624  | 0.000000  |
| 51               | 1                | 0              | 9.471106                | -3.584212  | 0.898082  |
| 52               | 1                | 0              | 9.471106                | -3.584212  | -0.898082 |
| 53               | 1                | 0              | 10.986660               | -3.840690  | 0.000000  |
| 54               | 6                | 0              | 10.030484               | 3.312624   | 0.000000  |
| 55               | 1                | 0              | 9.471106                | 3.584212   | -0.898082 |
| 56               | 1                | 0              | 9.471106                | 3.584212   | 0.898082  |
| 57               | 1                | 0              | 10.986660               | 3.840690   | 0.000000  |

|     |   |   |            |            |           |
|-----|---|---|------------|------------|-----------|
| 58  | 6 | 0 | 3.312624   | -10.030484 | 0.000000  |
| 59  | 1 | 0 | 3.584212   | -9.471106  | -0.898082 |
| 60  | 1 | 0 | 3.584212   | -9.471106  | 0.898082  |
| 61  | 1 | 0 | 3.840690   | -10.986660 | 0.000000  |
| 62  | 6 | 0 | -3.312624  | -10.030484 | 0.000000  |
| 63  | 1 | 0 | -3.584212  | -9.471106  | 0.898082  |
| 64  | 1 | 0 | -3.584212  | -9.471106  | -0.898082 |
| 65  | 1 | 0 | -3.840690  | -10.986660 | 0.000000  |
| 66  | 6 | 0 | -10.030484 | -3.312624  | 0.000000  |
| 67  | 1 | 0 | -9.471106  | -3.584212  | -0.898082 |
| 68  | 1 | 0 | -9.471106  | -3.584212  | 0.898082  |
| 69  | 1 | 0 | -10.986660 | -3.840690  | 0.000000  |
| 70  | 6 | 0 | -10.030484 | 3.312624   | 0.000000  |
| 71  | 1 | 0 | -9.471106  | 3.584212   | 0.898082  |
| 72  | 1 | 0 | -9.471106  | 3.584212   | -0.898082 |
| 73  | 1 | 0 | -10.986660 | 3.840690   | 0.000000  |
| 74  | 6 | 0 | -3.312624  | 10.030484  | 0.000000  |
| 75  | 1 | 0 | -3.584212  | 9.471106   | -0.898082 |
| 76  | 1 | 0 | -3.584212  | 9.471106   | 0.898082  |
| 77  | 1 | 0 | -3.840690  | 10.986660  | 0.000000  |
| 78  | 6 | 0 | 3.312624   | 10.030484  | 0.000000  |
| 79  | 1 | 0 | 3.584212   | 9.471106   | 0.898082  |
| 80  | 1 | 0 | 3.584212   | 9.471106   | -0.898082 |
| 81  | 1 | 0 | 3.840690   | 10.986660  | 0.000000  |
| 82  | 7 | 0 | 5.294336   | 1.446950   | 0.000000  |
| 83  | 7 | 0 | 5.294336   | -1.446950  | 0.000000  |
| 84  | 7 | 0 | 1.446950   | -5.294336  | 0.000000  |
| 85  | 7 | 0 | -1.446950  | -5.294336  | 0.000000  |
| 86  | 7 | 0 | -5.294336  | -1.446950  | 0.000000  |
| 87  | 7 | 0 | -5.294336  | 1.446950   | 0.000000  |
| 88  | 7 | 0 | -1.446950  | 5.294336   | 0.000000  |
| 89  | 7 | 0 | 1.446950   | 5.294336   | 0.000000  |
| 90  | 6 | 0 | -1.404798  | 7.686692   | 0.000000  |
| 91  | 1 | 0 | -2.486876  | 7.645098   | 0.000000  |
| 92  | 6 | 0 | 1.404798   | 7.686692   | 0.000000  |
| 93  | 1 | 0 | 2.486876   | 7.645098   | 0.000000  |
| 94  | 6 | 0 | -7.686692  | 1.404798   | 0.000000  |
| 95  | 1 | 0 | -7.645098  | 2.486876   | 0.000000  |
| 96  | 6 | 0 | -7.686692  | -1.404798  | 0.000000  |
| 97  | 1 | 0 | -7.645098  | -2.486876  | 0.000000  |
| 98  | 6 | 0 | -1.404798  | -7.686692  | 0.000000  |
| 99  | 1 | 0 | -2.486876  | -7.645098  | 0.000000  |
| 100 | 6 | 0 | 1.404798   | -7.686692  | 0.000000  |
| 101 | 1 | 0 | 2.486876   | -7.645098  | 0.000000  |
| 102 | 6 | 0 | 7.686692   | -1.404798  | 0.000000  |
| 103 | 1 | 0 | 7.645098   | -2.486876  | 0.000000  |
| 104 | 6 | 0 | 7.686692   | 1.404798   | 0.000000  |
| 105 | 1 | 0 | 7.645098   | 2.486876   | 0.000000  |

-----  
Optimized structures for 6,7-TQPz:

| Center<br>Number | Atomic<br>Number | Atomic<br>Type | Coordinates (Angstroms) |           |          |
|------------------|------------------|----------------|-------------------------|-----------|----------|
|                  |                  |                | X                       | Y         | Z        |
| 1                | 7                | 0              | 0.000000                | 2.003033  | 0.000000 |
| 2                | 7                | 0              | 2.003033                | 0.000000  | 0.000000 |
| 3                | 7                | 0              | -2.003033               | 0.000000  | 0.000000 |
| 4                | 7                | 0              | 0.000000                | -2.003033 | 0.000000 |
| 5                | 6                | 0              | 1.122217                | 2.789099  | 0.000000 |

|    |    |   |            |            |           |
|----|----|---|------------|------------|-----------|
| 6  | 6  | 0 | -1.122217  | 2.789099   | 0.000000  |
| 7  | 6  | 0 | 2.789099   | 1.122217   | 0.000000  |
| 8  | 6  | 0 | 2.789099   | -1.122217  | 0.000000  |
| 9  | 6  | 0 | -2.789099  | 1.122217   | 0.000000  |
| 10 | 6  | 0 | -2.789099  | -1.122217  | 0.000000  |
| 11 | 6  | 0 | 1.122217   | -2.789099  | 0.000000  |
| 12 | 6  | 0 | -1.122217  | -2.789099  | 0.000000  |
| 13 | 7  | 0 | 2.392739   | 2.392739   | 0.000000  |
| 14 | 6  | 0 | 0.713019   | 4.193404   | 0.000000  |
| 15 | 6  | 0 | -0.713019  | 4.193404   | 0.000000  |
| 16 | 6  | 0 | 4.193404   | 0.713019   | 0.000000  |
| 17 | 7  | 0 | 2.392739   | -2.392739  | 0.000000  |
| 18 | 6  | 0 | 4.193404   | -0.713019  | 0.000000  |
| 19 | 7  | 0 | -2.392739  | 2.392739   | 0.000000  |
| 20 | 6  | 0 | -4.193404  | 0.713019   | 0.000000  |
| 21 | 6  | 0 | -4.193404  | -0.713019  | 0.000000  |
| 22 | 6  | 0 | 0.713019   | -4.193404  | 0.000000  |
| 23 | 7  | 0 | -2.392739  | -2.392739  | 0.000000  |
| 24 | 6  | 0 | -0.713019  | -4.193404  | 0.000000  |
| 25 | 6  | 0 | 0.717730   | 6.585952   | 0.000000  |
| 26 | 6  | 0 | -0.717730  | 6.585952   | 0.000000  |
| 27 | 6  | 0 | -6.585952  | 0.717730   | 0.000000  |
| 28 | 6  | 0 | -6.585952  | -0.717730  | 0.000000  |
| 29 | 6  | 0 | -0.717730  | -6.585952  | 0.000000  |
| 30 | 6  | 0 | 0.717730   | -6.585952  | 0.000000  |
| 31 | 6  | 0 | 6.585952   | -0.717730  | 0.000000  |
| 32 | 6  | 0 | 6.585952   | 0.717730   | 0.000000  |
| 33 | 6  | 0 | 8.887371   | -0.729080  | 0.000000  |
| 34 | 6  | 0 | 8.887371   | 0.729080   | 0.000000  |
| 35 | 6  | 0 | -8.887371  | -0.729080  | 0.000000  |
| 36 | 6  | 0 | -8.887371  | 0.729080   | 0.000000  |
| 37 | 6  | 0 | 0.729080   | -8.887371  | 0.000000  |
| 38 | 6  | 0 | -0.729080  | -8.887371  | 0.000000  |
| 39 | 6  | 0 | 0.729080   | 8.887371   | 0.000000  |
| 40 | 6  | 0 | -0.729080  | 8.887371   | 0.000000  |
| 41 | 30 | 0 | 0.000000   | 0.000000   | 0.000000  |
| 42 | 16 | 0 | -10.444301 | 1.582106   | 0.000000  |
| 43 | 16 | 0 | -10.444301 | -1.582106  | 0.000000  |
| 44 | 16 | 0 | -1.582106  | 10.444301  | 0.000000  |
| 45 | 16 | 0 | 1.582106   | 10.444301  | 0.000000  |
| 46 | 16 | 0 | 10.444301  | 1.582106   | 0.000000  |
| 47 | 16 | 0 | 10.444301  | -1.582106  | 0.000000  |
| 48 | 16 | 0 | -1.582106  | -10.444301 | 0.000000  |
| 49 | 16 | 0 | 1.582106   | -10.444301 | 0.000000  |
| 50 | 6  | 0 | 9.893666   | -3.321944  | 0.000000  |
| 51 | 1  | 0 | 9.305362   | -3.537437  | 0.893106  |
| 52 | 1  | 0 | 9.305362   | -3.537437  | -0.893106 |
| 53 | 1  | 0 | 10.808531  | -3.918399  | 0.000000  |
| 54 | 6  | 0 | 9.893666   | 3.321944   | 0.000000  |
| 55 | 1  | 0 | 9.305362   | 3.537437   | -0.893106 |
| 56 | 1  | 0 | 9.305362   | 3.537437   | 0.893106  |
| 57 | 1  | 0 | 10.808531  | 3.918399   | 0.000000  |
| 58 | 6  | 0 | 3.321944   | -9.893666  | 0.000000  |
| 59 | 1  | 0 | 3.537437   | -9.305362  | -0.893106 |
| 60 | 1  | 0 | 3.537437   | -9.305362  | 0.893106  |
| 61 | 1  | 0 | 3.918399   | -10.808531 | 0.000000  |
| 62 | 6  | 0 | -3.321944  | -9.893666  | 0.000000  |
| 63 | 1  | 0 | -3.537437  | -9.305362  | 0.893106  |
| 64 | 1  | 0 | -3.537437  | -9.305362  | -0.893106 |
| 65 | 1  | 0 | -3.918399  | -10.808531 | 0.000000  |

|     |   |   |            |           |           |
|-----|---|---|------------|-----------|-----------|
| 66  | 6 | 0 | -9.893666  | -3.321944 | 0.000000  |
| 67  | 1 | 0 | -9.305362  | -3.537437 | -0.893106 |
| 68  | 1 | 0 | -9.305362  | -3.537437 | 0.893106  |
| 69  | 1 | 0 | -10.808531 | -3.918399 | 0.000000  |
| 70  | 6 | 0 | -9.893666  | 3.321944  | 0.000000  |
| 71  | 1 | 0 | -9.305362  | 3.537437  | 0.893106  |
| 72  | 1 | 0 | -9.305362  | 3.537437  | -0.893106 |
| 73  | 1 | 0 | -10.808531 | 3.918399  | 0.000000  |
| 74  | 6 | 0 | -3.321944  | 9.893666  | 0.000000  |
| 75  | 1 | 0 | -3.537437  | 9.305362  | -0.893106 |
| 76  | 1 | 0 | -3.537437  | 9.305362  | 0.893106  |
| 77  | 1 | 0 | -3.918399  | 10.808531 | 0.000000  |
| 78  | 6 | 0 | 3.321944   | 9.893666  | 0.000000  |
| 79  | 1 | 0 | 3.537437   | 9.305362  | 0.893106  |
| 80  | 1 | 0 | 3.537437   | 9.305362  | -0.893106 |
| 81  | 1 | 0 | 3.918399   | 10.808531 | 0.000000  |
| 82  | 7 | 0 | 7.770769   | -1.406937 | 0.000000  |
| 83  | 7 | 0 | 7.770769   | 1.406937  | 0.000000  |
| 84  | 7 | 0 | 1.406937   | -7.770769 | 0.000000  |
| 85  | 7 | 0 | -1.406937  | -7.770769 | 0.000000  |
| 86  | 7 | 0 | -7.770769  | 1.406937  | 0.000000  |
| 87  | 7 | 0 | -7.770769  | -1.406937 | 0.000000  |
| 88  | 7 | 0 | 1.406937   | 7.770769  | 0.000000  |
| 89  | 7 | 0 | -1.406937  | 7.770769  | 0.000000  |
| 90  | 6 | 0 | 1.435443   | 5.370153  | 0.000000  |
| 91  | 1 | 0 | 2.520332   | 5.387085  | 0.000000  |
| 92  | 6 | 0 | -1.435443  | 5.370153  | 0.000000  |
| 93  | 1 | 0 | -2.520332  | 5.387085  | 0.000000  |
| 94  | 6 | 0 | -5.370153  | 1.435443  | 0.000000  |
| 95  | 1 | 0 | -5.387085  | 2.520332  | 0.000000  |
| 96  | 6 | 0 | -5.370153  | -1.435443 | 0.000000  |
| 97  | 1 | 0 | -5.387085  | -2.520332 | 0.000000  |
| 98  | 6 | 0 | -1.435443  | -5.370153 | 0.000000  |
| 99  | 1 | 0 | -2.520332  | -5.387085 | 0.000000  |
| 100 | 6 | 0 | 1.435443   | -5.370153 | 0.000000  |
| 101 | 1 | 0 | 2.520332   | -5.387085 | 0.000000  |
| 102 | 6 | 0 | 5.370153   | -1.435443 | 0.000000  |
| 103 | 1 | 0 | 5.387085   | -2.520332 | 0.000000  |
| 104 | 6 | 0 | 5.370153   | 1.435443  | 0.000000  |
| 105 | 1 | 0 | 5.387085   | 2.520332  | 0.000000  |

-----

Excitation energies and oscillator strengths: TPyzPz

Excited State 1: Singlet-EU 1.9945 eV 621.63 nm f=0.8599 <S\*\*2>=0.000  
 231 ->245 0.11185  
 243 ->244 0.69051

This state for optimization and/or second-order correction.

Total Energy, E(TD-HF/TD-KS) = -7074.62092324

Copying the excited state density for this state as the 1-particle RhoCI density.

Excited State 2: Singlet-EU 1.9945 eV 621.63 nm f=0.8600 <S\*\*2>=0.000  
 231 ->244 -0.11185  
 243 ->245 0.69051

Excited state symmetry could not be determined.

Excited State 3: Singlet-?Sym 2.3770 eV 521.60 nm f=0.0000 <S\*\*2>=0.000  
 240 ->245 0.49735

241 ->244 0.49735

Excited state symmetry could not be determined.

Excited State 4: Singlet-?Sym 2.3801 eV 520.93 nm f=0.0000 <S\*\*2>=0.000

240 ->245 -0.49720

241 ->244 0.49720

Excited State 5: Singlet-EU 2.3862 eV 519.59 nm f=0.0002 <S\*\*2>=0.000

239 ->244 0.12502

242 ->244 0.68986

Excited State 6: Singlet-EU 2.3862 eV 519.59 nm f=0.0002 <S\*\*2>=0.000

239 ->245 -0.12502

242 ->245 0.68986

Excited state symmetry could not be determined.

Excited State 7: Singlet-?Sym 2.4429 eV 507.53 nm f=0.0000 <S\*\*2>=0.000

240 ->244 0.49915

241 ->245 0.49915

Excited State 8: Singlet-EU 2.4656 eV 502.85 nm f=0.6176 <S\*\*2>=0.000

239 ->245 0.68723

242 ->245 0.13355

Excited State 9: Singlet-EU 2.4656 eV 502.85 nm f=0.6177 <S\*\*2>=0.000

239 ->244 0.68723

242 ->244 -0.13355

Excited state symmetry could not be determined.

Excited State 10: Singlet-?Sym 2.4742 eV 501.11 nm f=0.0000 <S\*\*2>=0.000

240 ->244 -0.49888

241 ->245 0.49888

Excited State 11: Singlet-EG 2.6776 eV 463.04 nm f=0.0000 <S\*\*2>=0.000

238 ->244 0.37966

238 ->245 0.58372

Excited State 12: Singlet-EG 2.6776 eV 463.04 nm f=0.0000 <S\*\*2>=0.000

238 ->244 0.58372

238 ->245 -0.37966

Excited State 13: Singlet-B2G 3.1694 eV 391.19 nm f=0.0000 <S\*\*2>=0.000

243 ->246 0.70158

Excited state symmetry could not be determined.

Excited State 14: Singlet-?Sym 3.2147 eV 385.67 nm f=0.0000 <S\*\*2>=0.000

232 ->244 0.49052

233 ->245 0.49052

Excited state symmetry could not be determined.

Excited State 15: Singlet-?Sym 3.2214 eV 384.88 nm f=0.0000 <S\*\*2>=0.000

232 ->244 0.49328

233 ->245 -0.49328

Excited State 16: Singlet-A2G 3.2569 eV 380.68 nm f=0.0000 <S\*\*2>=0.000

243 ->247 0.70219

Excited state symmetry could not be determined.

Excited State 17: Singlet-?Sym 3.2779 eV 378.24 nm f=0.0000 <S\*\*2>=0.000

236 ->245 -0.49135

237 ->244 0.49135

Excited state symmetry could not be determined.

Excited State 18: Singlet-?Sym 3.2930 eV 376.51 nm f=0.0000 <S\*\*2>=0.000

236 ->245 0.47798  
237 ->244 0.47798  
242 ->246 -0.12464

Excited State 19: Singlet-EU 3.3041 eV 375.24 nm f=0.1751 <S\*\*2>=0.000

231 ->244 -0.11343  
234 ->245 -0.11738  
235 ->245 0.67635

Excited State 20: Singlet-EU 3.3041 eV 375.24 nm f=0.1751 <S\*\*2>=0.000

231 ->245 -0.11343  
234 ->244 0.11738  
235 ->244 0.67635

Excited state symmetry could not be determined.

Excited State 21: Singlet-?Sym 3.3133 eV 374.21 nm f=0.0000 <S\*\*2>=0.000

236 ->244 -0.49670  
237 ->245 0.49670

Excited State 22: Singlet-EG 3.3278 eV 372.57 nm f=0.0000 <S\*\*2>=0.000

228 ->244 0.65642  
228 ->245 0.24834

Excited State 23: Singlet-EG 3.3278 eV 372.57 nm f=0.0000 <S\*\*2>=0.000

228 ->244 -0.24834  
228 ->245 0.65642

Excited state symmetry could not be determined.

Excited State 24: Singlet-?Sym 3.3323 eV 372.07 nm f=0.0000 <S\*\*2>=0.000

232 ->245 0.49089  
233 ->244 0.49089

Excited state symmetry could not be determined.

Excited State 25: Singlet-?Sym 3.3335 eV 371.94 nm f=0.0001 <S\*\*2>=0.000

232 ->245 -0.48891  
233 ->244 0.48891

Excited state symmetry could not be determined.

Excited State 26: Singlet-?Sym 3.3345 eV 371.82 nm f=0.0000 <S\*\*2>=0.000

236 ->244 0.49744  
237 ->245 0.49744

Excited State 27: Singlet-EU 3.3515 eV 369.93 nm f=0.0815 <S\*\*2>=0.000

243 ->249 0.69532

Excited State 28: Singlet-EU 3.3515 eV 369.93 nm f=0.0815 <S\*\*2>=0.000

243 ->248 0.69532

Excited State 29: Singlet-EG 3.3828 eV 366.51 nm f=0.0000 <S\*\*2>=0.000

229 ->244 -0.41134  
229 ->245 -0.16532  
230 ->244 0.49688  
230 ->245 -0.19970

Excited State 30: Singlet-EG 3.3828 eV 366.51 nm f=0.0000 <S\*\*2>=0.000

229 ->244 -0.16532

|                   |             |           |           |          |              |
|-------------------|-------------|-----------|-----------|----------|--------------|
| 229 ->245         | 0.41134     |           |           |          |              |
| 230 ->244         | 0.19970     |           |           |          |              |
| 230 ->245         | 0.49688     |           |           |          |              |
| Excited State 31: | Singlet-EU  | 3.4397 eV | 360.45 nm | f=0.0669 | <S**2>=0.000 |
| 231 ->244         | 0.32936     |           |           |          |              |
| 234 ->245         | 0.59633     |           |           |          |              |
| 235 ->245         | 0.16356     |           |           |          |              |
| Excited State 32: | Singlet-EU  | 3.4397 eV | 360.45 nm | f=0.0669 | <S**2>=0.000 |
| 231 ->245         | -0.32936    |           |           |          |              |
| 234 ->244         | 0.59633     |           |           |          |              |
| 235 ->244         | -0.16356    |           |           |          |              |
| Excited State 33: | Singlet-B1G | 3.4631 eV | 358.01 nm | f=0.0000 | <S**2>=0.000 |
| 239 ->246         | -0.10065    |           |           |          |              |
| 242 ->247         | -0.10062    |           |           |          |              |
| 243 ->250         | 0.67700     |           |           |          |              |
| Excited State 34: | Singlet-EG  | 3.4944 eV | 354.81 nm | f=0.0000 | <S**2>=0.000 |
| 229 ->245         | 0.52846     |           |           |          |              |
| 230 ->245         | -0.43970    |           |           |          |              |
| Excited State 35: | Singlet-EG  | 3.4944 eV | 354.81 nm | f=0.0000 | <S**2>=0.000 |
| 229 ->244         | 0.52846     |           |           |          |              |
| 230 ->244         | 0.43970     |           |           |          |              |
| Excited State 36: | Singlet-EU  | 3.5248 eV | 351.75 nm | f=1.5941 | <S**2>=0.000 |
| 231 ->244         | 0.46891     |           |           |          |              |
| 234 ->245         | -0.23877    |           |           |          |              |
| 239 ->248         | -0.19294    |           |           |          |              |
| 240 ->246         | -0.29719    |           |           |          |              |
| 240 ->247         | 0.21456     |           |           |          |              |
| 242 ->248         | 0.19520     |           |           |          |              |
| Excited State 37: | Singlet-EU  | 3.5248 eV | 351.75 nm | f=1.5941 | <S**2>=0.000 |
| 231 ->245         | 0.46891     |           |           |          |              |
| 234 ->244         | 0.23876     |           |           |          |              |
| 239 ->249         | 0.19294     |           |           |          |              |
| 241 ->246         | -0.29719    |           |           |          |              |
| 241 ->247         | -0.21456    |           |           |          |              |
| 242 ->249         | 0.19520     |           |           |          |              |
| Excited State 38: | Singlet-B1G | 3.6844 eV | 336.51 nm | f=0.0000 | <S**2>=0.000 |
| 239 ->246         | 0.43323     |           |           |          |              |
| 240 ->248         | 0.25415     |           |           |          |              |
| 241 ->249         | -0.25415    |           |           |          |              |
| 242 ->247         | 0.35790     |           |           |          |              |
| 243 ->250         | 0.17295     |           |           |          |              |
| Excited State 39: | Singlet-A1G | 3.7865 eV | 327.44 nm | f=0.0000 | <S**2>=0.000 |
| 236 ->245         | 0.13417     |           |           |          |              |
| 237 ->244         | 0.13417     |           |           |          |              |
| 239 ->247         | 0.20332     |           |           |          |              |
| 240 ->248         | -0.19889    |           |           |          |              |
| 241 ->249         | -0.19889    |           |           |          |              |
| 242 ->246         | 0.57734     |           |           |          |              |
| Excited State 40: | Singlet-EU  | 3.8541 eV | 321.70 nm | f=0.0166 | <S**2>=0.000 |
| 231 ->244         | 0.33458     |           |           |          |              |



|                                                                          |          |
|--------------------------------------------------------------------------|----------|
| 234 ->245                                                                | -0.25329 |
| 240 ->246                                                                | 0.44516  |
| 240 ->247                                                                | -0.20824 |
| 242 ->248                                                                | -0.18619 |
| Excited State 41: Singlet-EU 3.8541 eV 321.70 nm f=0.0166 <S**2>=0.000   |          |
| 231 ->245                                                                | 0.33458  |
| 234 ->244                                                                | 0.25328  |
| 241 ->246                                                                | 0.44516  |
| 241 ->247                                                                | 0.20824  |
| 242 ->249                                                                | -0.18619 |
| Excited State 42: Singlet-B1G 3.8878 eV 318.90 nm f=0.0000 <S**2>=0.000  |          |
| 239 ->246                                                                | 0.49711  |
| 242 ->247                                                                | -0.49207 |
| Excited State 43: Singlet-EU 3.8903 eV 318.70 nm f=0.0347 <S**2>=0.000   |          |
| 240 ->246                                                                | 0.41997  |
| 240 ->247                                                                | 0.52932  |
| 242 ->248                                                                | 0.16355  |
| Excited State 44: Singlet-EU 3.8903 eV 318.70 nm f=0.0347 <S**2>=0.000   |          |
| 241 ->246                                                                | -0.41997 |
| 241 ->247                                                                | 0.52932  |
| 242 ->249                                                                | -0.16355 |
| Excited state symmetry could not be determined.                          |          |
| Excited State 45: Singlet-?Sym 3.8990 eV 317.99 nm f=0.0100 <S**2>=0.000 |          |
| 226 ->245                                                                | 0.47581  |
| 227 ->244                                                                | 0.47581  |
| 228 ->250                                                                | -0.14620 |
| Excited state symmetry could not be determined.                          |          |
| Excited State 46: Singlet-?Sym 3.9011 eV 317.82 nm f=0.0000 <S**2>=0.000 |          |
| 226 ->244                                                                | -0.49025 |
| 227 ->245                                                                | 0.49025  |
| Excited state symmetry could not be determined.                          |          |
| Excited State 47: Singlet-?Sym 3.9033 eV 317.64 nm f=0.0000 <S**2>=0.000 |          |
| 226 ->244                                                                | 0.49407  |
| 227 ->245                                                                | 0.49407  |
| Excited State 48: Singlet-A1G 3.9036 eV 317.61 nm f=0.0000 <S**2>=0.000  |          |
| 239 ->247                                                                | 0.54222  |
| 240 ->248                                                                | -0.19243 |
| 241 ->249                                                                | -0.19243 |
| 242 ->246                                                                | -0.35272 |
| Excited state symmetry could not be determined.                          |          |
| Excited State 49: Singlet-?Sym 3.9226 eV 316.08 nm f=0.0000 <S**2>=0.000 |          |
| 226 ->245                                                                | -0.48726 |
| 227 ->244                                                                | 0.48726  |
| Excited State 50: Singlet-A2G 3.9943 eV 310.40 nm f=0.0000 <S**2>=0.000  |          |
| 240 ->249                                                                | -0.35582 |
| 241 ->248                                                                | 0.35582  |
| 242 ->250                                                                | 0.49121  |
| Excited State 51: Singlet-EU 4.0080 eV 309.34 nm f=0.0694 <S**2>=0.000   |          |
| 239 ->248                                                                | 0.29995  |

240 ->247 -0.16567  
241 ->250 0.37170  
242 ->248 0.48064

Excited State 52: Singlet-EU 4.0080 eV 309.34 nm f=0.0694 <S\*\*2>=0.000

239 ->249 -0.29995  
240 ->250 -0.37169  
241 ->247 0.16567  
242 ->249 0.48064

Excited state symmetry could not be determined.

Excited State 53: Singlet-?Sym 4.0176 eV 308.61 nm f=0.0000 <S\*\*2>=0.000

239 ->250 0.25413  
240 ->249 0.46366  
241 ->248 0.46366

Excited State 54: Singlet-A2U 4.0562 eV 305.67 nm f=0.0072 <S\*\*2>=0.000

229 ->246 -0.11005  
230 ->247 0.21911  
232 ->249 0.23295  
233 ->248 0.23295  
238 ->246 0.54846

Excited State 55: Singlet-A2G 4.0706 eV 304.59 nm f=0.0000 <S\*\*2>=0.000

240 ->249 0.35045  
241 ->248 -0.35045  
242 ->250 0.50169

Excited state symmetry could not be determined.

Excited State 56: Singlet-?Sym 4.0715 eV 304.52 nm f=0.0000 <S\*\*2>=0.000

239 ->246 0.22076  
240 ->248 -0.40840  
241 ->249 0.40840  
242 ->247 0.33814

Excited State 57: Singlet-EU 4.0768 eV 304.12 nm f=0.0267 <S\*\*2>=0.000

239 ->248 0.10046  
240 ->247 0.20096  
241 ->250 0.52247  
242 ->248 -0.39907

Excited State 58: Singlet-EU 4.0768 eV 304.12 nm f=0.0267 <S\*\*2>=0.000

239 ->249 0.10047  
240 ->250 0.52247  
241 ->247 0.20096  
242 ->249 0.39907

Excited state symmetry could not be determined.

Excited State 59: Singlet-?Sym 4.0789 eV 303.96 nm f=0.0000 <S\*\*2>=0.000

239 ->247 0.38924  
240 ->248 0.40203  
241 ->249 0.40203  
242 ->246 0.15137

Excited State 60: Singlet-B2U 4.0931 eV 302.91 nm f=0.0000 <S\*\*2>=0.000

229 ->247 -0.15624  
230 ->246 0.26636  
232 ->249 0.27149  
233 ->248 -0.27149  
238 ->247 0.48010

Excited State 61: Singlet-EU 4.0938 eV 302.86 nm f=0.0013 <S\*\*2>=0.000  
239 ->248 0.58508  
240 ->246 -0.12371  
240 ->247 0.23600  
241 ->250 -0.27732

Excited State 62: Singlet-EU 4.0938 eV 302.86 nm f=0.0013 <S\*\*2>=0.000  
239 ->249 0.58508  
240 ->250 -0.27732  
241 ->246 0.12371  
241 ->247 0.23600

Excited State 63: Singlet-EG 4.1137 eV 301.39 nm f=0.0000 <S\*\*2>=0.000  
229 ->248 -0.16483  
230 ->248 -0.25105  
233 ->246 0.34028  
233 ->247 -0.32345  
238 ->248 0.40230

Excited State 64: Singlet-EG 4.1137 eV 301.39 nm f=0.0000 <S\*\*2>=0.000  
229 ->249 -0.16483  
230 ->249 0.25105  
232 ->246 0.34028  
232 ->247 0.32345  
238 ->249 0.40230

Excited State 65: Singlet-B2G 4.1179 eV 301.09 nm f=0.0000 <S\*\*2>=0.000  
239 ->250 0.65084  
240 ->249 -0.18465  
241 ->248 -0.18465

Excited state symmetry could not be determined.

Excited State 66: Singlet-?Sym 4.2815 eV 289.58 nm f=0.0000 <S\*\*2>=0.000  
224 ->245 -0.48225  
225 ->244 0.48225

Excited State 67: Singlet-A1U 4.4029 eV 281.60 nm f=0.0000 <S\*\*2>=0.000  
238 ->250 0.68683

Excited state symmetry could not be determined.

Excited State 68: Singlet-?Sym 4.4129 eV 280.96 nm f=0.0000 <S\*\*2>=0.000  
224 ->245 0.46407  
225 ->244 0.46407  
234 ->246 -0.11222  
235 ->247 -0.12169  
236 ->248 -0.10196  
237 ->249 0.10196

Excited State 69: Singlet-A2U 4.4251 eV 280.19 nm f=0.0103 <S\*\*2>=0.000  
229 ->246 0.33203  
230 ->247 -0.27909  
232 ->249 -0.25171  
233 ->248 -0.25171  
238 ->246 0.41236

Excited State 70: Singlet-EU 4.4645 eV 277.71 nm f=0.0366 <S\*\*2>=0.000  
223 ->244 -0.19508  
234 ->249 -0.22998  
235 ->249 -0.28903

237 ->246 0.44100  
237 ->247 0.34151

SavETr: write IOETrn= 770 NScale= 10 NData= 16 NLR=1 LETran= 1270.  
Leave Link 914 at Sun Jul 20 18:16:02 2014, MaxMem= 2359296000 cpu: 382628.6  
(Enter /usr/local/g09/l601.exe)  
Copying SCF densities to generalized density rwf, IOpCl= 0 IROHF=0.

Excitation energies and oscillator strengths: Pc

Excited State 1: Singlet-EU 1.7876 eV 693.60 nm f=1.0068 <S\*\*2>=0.000  
243 ->244 0.57476  
243 ->245 -0.40016

This state for optimization and/or second-order correction.

Total Energy, E(TD-HF/TD-KS) = -6946.33055278

Copying the excited state density for this state as the 1-particle RhoCI density.

Excited State 2: Singlet-EU 1.7876 eV 693.60 nm f=1.0068 <S\*\*2>=0.000  
243 ->244 0.40016  
243 ->245 0.57476

Excited state symmetry could not be determined.

Excited State 3: Singlet-?Sym 2.4779 eV 500.35 nm f=0.0000 <S\*\*2>=0.000  
240 ->244 0.49712  
241 ->245 0.49712

Excited state symmetry could not be determined.

Excited State 4: Singlet-?Sym 2.4812 eV 499.69 nm f=0.0000 <S\*\*2>=0.000  
240 ->244 -0.49638  
241 ->245 0.49638

Excited State 5: Singlet-EU 2.4859 eV 498.75 nm f=0.0043 <S\*\*2>=0.000  
239 ->244 0.12995  
239 ->245 -0.13357  
242 ->244 0.47222  
242 ->245 0.48538

Excited State 6: Singlet-EU 2.4859 eV 498.75 nm f=0.0043 <S\*\*2>=0.000  
239 ->244 0.13357  
239 ->245 0.12995  
242 ->244 0.48538  
242 ->245 -0.47222

Excited state symmetry could not be determined.

Excited State 7: Singlet-?Sym 2.5430 eV 487.55 nm f=0.0000 <S\*\*2>=0.000  
240 ->245 0.49893  
241 ->244 0.49893

Excited State 8: Singlet-EU 2.5565 eV 484.98 nm f=0.4999 <S\*\*2>=0.000  
239 ->244 0.67669  
242 ->244 -0.19075

Excited State 9: Singlet-EU 2.5565 eV 484.98 nm f=0.4999 <S\*\*2>=0.000  
239 ->245 0.67669  
242 ->245 0.19075

Excited state symmetry could not be determined.

Excited State 10: Singlet-?Sym 2.5595 eV 484.42 nm f=0.0000 <S\*\*2>=0.000  
240 ->245 -0.49774  
241 ->244 0.49774

Excited State 11: Singlet-EG 2.9169 eV 425.06 nm f=0.0000 <S\*\*2>=0.000  
235 ->244 0.68971  
235 ->245 -0.14937

Excited State 12: Singlet-EG 2.9169 eV 425.06 nm f=0.0000 <S\*\*2>=0.000  
235 ->244 0.14937  
235 ->245 0.68971

Excited state symmetry could not be determined.

Excited State 13: Singlet-?Sym 3.0745 eV 403.27 nm f=0.0000 <S\*\*2>=0.000  
236 ->244 -0.49287  
237 ->245 0.49287

Excited state symmetry could not be determined.

Excited State 14: Singlet-?Sym 3.0889 eV 401.39 nm f=0.0000 <S\*\*2>=0.000  
236 ->245 -0.49746  
237 ->244 0.49746

Excited State 15: Singlet-EU 3.0985 eV 400.14 nm f=0.3582 <S\*\*2>=0.000  
238 ->245 0.69501

Excited State 16: Singlet-EU 3.0985 eV 400.14 nm f=0.3582 <S\*\*2>=0.000  
238 ->244 0.69501

Excited state symmetry could not be determined.

Excited State 17: Singlet-?Sym 3.1332 eV 395.71 nm f=0.0000 <S\*\*2>=0.000  
236 ->245 0.49727  
237 ->244 0.49727

Excited state symmetry could not be determined.

Excited State 18: Singlet-?Sym 3.1577 eV 392.64 nm f=0.0000 <S\*\*2>=0.000  
236 ->244 0.49188  
237 ->245 0.49188

Excited State 19: Singlet-B1G 3.2503 eV 381.46 nm f=0.0000 <S\*\*2>=0.000  
243 ->246 0.69804

Excited State 20: Singlet-EU 3.4859 eV 355.68 nm f=0.0785 <S\*\*2>=0.000  
233 ->244 0.33676  
234 ->245 0.61178

Excited State 21: Singlet-EU 3.4859 eV 355.68 nm f=0.0785 <S\*\*2>=0.000  
233 ->245 -0.33676  
234 ->244 0.61178

Excited State 22: Singlet-B2G 3.5080 eV 353.43 nm f=0.0000 <S\*\*2>=0.000  
243 ->247 0.69984

Excited State 23: Singlet-EG 3.5278 eV 351.45 nm f=0.0000 <S\*\*2>=0.000  
232 ->244 0.58107  
232 ->245 0.39461

Excited State 24: Singlet-EG 3.5278 eV 351.45 nm f=0.0000 <S\*\*2>=0.000  
232 ->244 -0.39461  
232 ->245 0.58107

Excited State 25: Singlet-A2G 3.6491 eV 339.77 nm f=0.0000 <S\*\*2>=0.000  
243 ->248 0.70278

Excited State 26: Singlet-EU 3.7567 eV 330.03 nm f=0.1997 <S\*\*2>=0.000  
233 ->244 0.33993  
233 ->245 0.18334  
234 ->245 -0.17341  
243 ->249 0.25146  
243 ->250 0.46622

Excited State 27: Singlet-EU 3.7567 eV 330.03 nm f=0.1996 <S\*\*2>=0.000  
233 ->244 -0.18334  
233 ->245 0.33993  
234 ->244 0.17341  
243 ->249 0.46622  
243 ->250 -0.25146

Excited State 28: Singlet-EU 3.7717 eV 328.72 nm f=0.8907 <S\*\*2>=0.000  
233 ->245 -0.43949  
234 ->244 -0.26238  
243 ->249 0.45902

Excited State 29: Singlet-EU 3.7717 eV 328.72 nm f=0.8907 <S\*\*2>=0.000  
233 ->244 -0.43949  
234 ->245 0.26238  
243 ->250 0.45902

Excited state symmetry could not be determined.

Excited State 30: Singlet-?Sym 4.0114 eV 309.08 nm f=0.0000 <S\*\*2>=0.000  
230 ->244 0.49313  
231 ->245 -0.49313

Excited state symmetry could not be determined.

Excited State 31: Singlet-?Sym 4.0149 eV 308.81 nm f=0.0057 <S\*\*2>=0.000  
230 ->245 0.48813  
231 ->244 0.48813  
232 ->246 -0.13915

Excited state symmetry could not be determined.

Excited State 32: Singlet-?Sym 4.0197 eV 308.44 nm f=0.0000 <S\*\*2>=0.000  
230 ->245 -0.49745  
231 ->244 0.49745

Excited state symmetry could not be determined.

Excited State 33: Singlet-?Sym 4.0244 eV 308.08 nm f=0.0000 <S\*\*2>=0.000  
230 ->244 0.49625  
231 ->245 0.49625

Excited State 34: Singlet-A2G 4.1309 eV 300.14 nm f=0.0000 <S\*\*2>=0.000  
242 ->246 0.68745

Excited State 35: Singlet-EU 4.1560 eV 298.33 nm f=0.1327 <S\*\*2>=0.000  
241 ->246 0.69333

Excited State 36: Singlet-EU 4.1560 eV 298.33 nm f=0.1327 <S\*\*2>=0.000  
240 ->246 0.69333

Excited State 37: Singlet-B2G 4.1907 eV 295.85 nm f=0.0000 <S\*\*2>=0.000  
228 ->245 0.10441  
229 ->244 0.10441  
239 ->246 0.68273

Excited state symmetry could not be determined.

Excited State 38: Singlet-?Sym 4.2581 eV 291.17 nm f=0.0000 <S\*\*2>=0.000  
224 ->245 0.13641  
225 ->244 0.13641  
228 ->245 -0.46485  
229 ->244 0.46485  
242 ->246 -0.13335

Excited State 39: Singlet-B1G 4.2637 eV 290.79 nm f=0.0000 <S\*\*2>=0.000  
239 ->247 0.48662  
240 ->250 0.25519  
241 ->249 -0.25519  
242 ->248 0.32518

Excited State 40: Singlet-EU 4.2921 eV 288.86 nm f=0.3564 <S\*\*2>=0.000  
236 ->246 -0.10668  
237 ->246 0.12916  
239 ->249 -0.17112  
239 ->250 -0.14133  
240 ->247 -0.29224  
240 ->248 -0.18489  
241 ->247 0.35383  
241 ->248 -0.22385  
242 ->249 0.18317  
242 ->250 -0.15129

Excited State 41: Singlet-EU 4.2921 eV 288.86 nm f=0.3564 <S\*\*2>=0.000  
236 ->246 0.12916  
237 ->246 0.10668  
239 ->249 -0.14133  
239 ->250 0.17112  
240 ->247 0.35383  
240 ->248 0.22385  
241 ->247 0.29224  
241 ->248 -0.18489  
242 ->249 0.15129  
242 ->250 0.18317

Excited State 42: Singlet-A1G 4.3013 eV 288.25 nm f=0.0000 <S\*\*2>=0.000  
228 ->244 0.14833  
229 ->245 0.14833  
238 ->246 0.17336  
239 ->248 0.24904  
240 ->250 0.20943  
241 ->249 0.20943  
242 ->247 0.48024  
243 ->255 0.13842

Excited state symmetry could not be determined.

Excited State 43: Singlet-?Sym 4.3595 eV 284.40 nm f=0.0000 <S\*\*2>=0.000  
224 ->245 -0.19193  
225 ->244 0.19193  
228 ->245 0.44337  
229 ->244 0.44337  
239 ->246 -0.14882

Excited state symmetry could not be determined.

Excited State 44: Singlet-?Sym 4.4035 eV 281.56 nm f=0.0000 <S\*\*2>=0.000  
228 ->244 -0.49304  
229 ->245 0.49304

Excited state symmetry could not be determined.

Excited State 45: Singlet-?Sym 4.4419 eV 279.12 nm f=0.0000 <S\*\*2>=0.000  
228 ->244 0.47220  
229 ->245 0.47220  
242 ->247 -0.12463

Excited State 46: Singlet-EU 4.4773 eV 276.92 nm f=0.0063 <S\*\*2>=0.000  
222 ->245 0.13810  
227 ->244 0.14444  
227 ->245 0.66060

Excited State 47: Singlet-EU 4.4773 eV 276.92 nm f=0.0063 <S\*\*2>=0.000  
222 ->244 -0.13810  
227 ->244 0.66060  
227 ->245 -0.14444

Excited State 48: Singlet-B1G 4.5345 eV 273.42 nm f=0.0000 <S\*\*2>=0.000  
239 ->247 -0.47125  
240 ->250 0.11868  
241 ->249 -0.11868  
242 ->248 0.48823

Excited State 49: Singlet-EU 4.5383 eV 273.20 nm f=0.0216 <S\*\*2>=0.000  
239 ->249 0.11929  
241 ->247 0.48256  
241 ->248 0.45733  
242 ->249 -0.14906

Excited State 50: Singlet-EU 4.5383 eV 273.20 nm f=0.0216 <S\*\*2>=0.000  
239 ->250 -0.11929  
240 ->247 0.48256  
240 ->248 -0.45733  
242 ->250 -0.14906

Excited State 51: Singlet-A1G 4.5384 eV 273.19 nm f=0.0000 <S\*\*2>=0.000  
238 ->246 -0.12303  
239 ->248 -0.44745  
240 ->250 -0.15920  
241 ->249 -0.15920  
242 ->247 0.46737

Excited State 52: Singlet-EU 4.6057 eV 269.20 nm f=0.0351 <S\*\*2>=0.000  
226 ->244 0.68639  
240 ->248 -0.10235

Excited State 53: Singlet-EU 4.6057 eV 269.20 nm f=0.0351 <S\*\*2>=0.000  
226 ->245 0.68639  
241 ->248 0.10235

Excited state symmetry could not be determined.

Excited State 54: Singlet-?Sym 4.6239 eV 268.14 nm f=0.0000 <S\*\*2>=0.000  
224 ->245 0.47507  
225 ->244 0.47507  
228 ->245 0.14428  
229 ->244 -0.14428

Excited state symmetry could not be determined.

Excited State 55: Singlet-?Sym 4.6392 eV 267.25 nm f=0.0000 <S\*\*2>=0.000  
224 ->245 -0.45532  
225 ->244 0.45532



228 ->245 -0.19360  
 229 ->244 -0.19360

Excited State 56: Singlet-A1U 4.6560 eV 266.29 nm f=0.0000 <S\*\*2>=0.000  
 235 ->246 0.69221

Excited state symmetry could not be determined.

Excited State 57: Singlet-?Sym 4.6628 eV 265.90 nm f=0.0000 <S\*\*2>=0.000  
 224 ->244 0.48591  
 225 ->245 -0.48591

Excited State 58: Singlet-A1U 4.6633 eV 265.87 nm f=0.0000 <S\*\*2>=0.000  
 243 ->251 0.69430

Excited state symmetry could not be determined.

Excited State 59: Singlet-?Sym 4.6785 eV 265.01 nm f=0.0000 <S\*\*2>=0.000  
 224 ->244 0.48639  
 225 ->245 0.48639  
 242 ->248 -0.13670

Excited State 60: Singlet-EG 4.6786 eV 265.00 nm f=0.0000 <S\*\*2>=0.000  
 243 ->252 -0.46496  
 243 ->253 0.51541

Excited State 61: Singlet-EG 4.6786 eV 265.00 nm f=0.0000 <S\*\*2>=0.000  
 243 ->252 0.51541  
 243 ->253 0.46496

Excited State 62: Singlet-B1U 4.6865 eV 264.56 nm f=0.0000 <S\*\*2>=0.000  
 243 ->254 0.69401

Excited State 63: Singlet-EU 4.7265 eV 262.32 nm f=0.0007 <S\*\*2>=0.000  
 236 ->246 0.12248  
 239 ->250 -0.22519  
 240 ->248 -0.25313  
 242 ->250 0.59107

Excited State 64: Singlet-EU 4.7265 eV 262.32 nm f=0.0007 <S\*\*2>=0.000  
 237 ->246 0.12248  
 239 ->249 0.22519  
 241 ->248 0.25313  
 242 ->249 0.59107

Excited state symmetry could not be determined.

Excited State 65: Singlet-?Sym 4.7323 eV 261.99 nm f=0.0000 <S\*\*2>=0.000  
 240 ->249 0.49699  
 241 ->250 0.49699

Excited state symmetry could not be determined.

Excited State 66: Singlet-?Sym 4.7340 eV 261.90 nm f=0.0000 <S\*\*2>=0.000  
 240 ->249 -0.49604  
 241 ->250 0.49604

Excited State 67: Singlet-EU 4.7421 eV 261.46 nm f=0.1498 <S\*\*2>=0.000  
 236 ->246 -0.17169  
 237 ->246 -0.38968  
 239 ->249 0.40676  
 239 ->250 -0.17921  
 240 ->248 0.11979  
 241 ->247 0.11871

241 ->248 -0.27190

Excited State 68: Singlet-EU 4.7421 eV 261.46 nm f=0.1498 <S\*\*2>=0.000

236 ->246 0.38968  
237 ->246 -0.17169  
239 ->249 0.17921  
239 ->250 0.40676  
240 ->247 -0.11871  
240 ->248 -0.27190  
241 ->248 -0.11979

Excited State 69: Singlet-A1G 4.7474 eV 261.16 nm f=0.0000 <S\*\*2>=0.000

238 ->246 -0.37185  
239 ->248 0.44073  
240 ->250 -0.26726  
241 ->249 -0.26726  
242 ->247 0.13894

Excited state symmetry could not be determined.

Excited State 70: Singlet-?Sym 4.7554 eV 260.72 nm f=0.0000 <S\*\*2>=0.000

239 ->247 0.18284  
240 ->250 -0.40205  
241 ->249 0.40205  
242 ->248 0.36099

SavETr: write IOETrn= 770 NScale= 10 NData= 16 NLR=1 LETran= 1270.

Leave Link 914 at Sun Jul 20 19:51:47 2014, MaxMem= 2359296000 cpu: 789314.6

(Enter /usr/local/g09/l601.exe)

Copying SCF densities to generalized density rwf, IOpCl= 0 IROHF=0.

TPyzPzPz

Excitation energies and oscillator strengths:

Excited State 1: Singlet-EU 1.8381 eV 674.53 nm f=0.9650 <S\*\*2>=0.000

295 -> 296 0.49906  
295 -> 297 0.48447

This state for optimization and/or second-order correction.

Total Energy, E(TD-HF/TD-KS) = -7817.51602671

Copying the excited state density for this state as the 1-particle RhoCI density.

Excited State 2: Singlet-EU 1.8381 eV 674.53 nm f=0.9650 <S\*\*2>=0.000

295 -> 296 -0.48447  
295 -> 297 0.49906

Excited State 3: Singlet-B2G 2.3063 eV 537.60 nm f=0.0000 <S\*\*2>=0.000

295 -> 298 0.69987

Excited State 4: Singlet-A2G 2.3724 eV 522.62 nm f=0.0000 <S\*\*2>=0.000

295 -> 299 0.69210

Excited State 5: Singlet-EG 2.5374 eV 488.62 nm f=0.0000 <S\*\*2>=0.000

282 -> 296 0.11895  
290 -> 296 0.56699  
290 -> 297 -0.36352

Excited State 6: Singlet-EG 2.5374 eV 488.62 nm f=0.0000 <S\*\*2>=0.000

282 -> 297 0.11895  
290 -> 296 0.36352  
290 -> 297 0.56699

Excited state symmetry could not be determined.

Excited State 7: Singlet-?Sym 2.5417 eV 487.80 nm f=0.0000 <S\*\*2>=0.000  
292 -> 296 -0.49309  
293 -> 297 0.49309

Excited State 8: Singlet-EU 2.5428 eV 487.58 nm f=0.0526 <S\*\*2>=0.000  
294 -> 296 0.68927

Excited State 9: Singlet-EU 2.5428 eV 487.58 nm f=0.0526 <S\*\*2>=0.000  
294 -> 297 0.68927

Excited state symmetry could not be determined.

Excited State 10: Singlet-?Sym 2.5434 eV 487.47 nm f=0.0000 <S\*\*2>=0.000  
292 -> 296 0.48792  
293 -> 297 0.48792  
295 -> 299 0.13549

Excited State 11: Singlet-EU 2.5607 eV 484.19 nm f=1.3128 <S\*\*2>=0.000  
291 -> 297 0.49741  
294 -> 297 -0.10826  
295 -> 301 0.45721

Excited State 12: Singlet-EU 2.5607 eV 484.19 nm f=1.3128 <S\*\*2>=0.000  
291 -> 296 0.49741  
294 -> 296 0.10826  
295 -> 300 0.45721

Excited state symmetry could not be determined.

Excited State 13: Singlet-?Sym 2.5686 eV 482.70 nm f=0.0000 <S\*\*2>=0.000  
292 -> 297 0.49419  
293 -> 296 0.49419

Excited State 14: Singlet-EU 2.5921 eV 478.31 nm f=0.0052 <S\*\*2>=0.000  
291 -> 296 -0.47488  
295 -> 300 0.50577

Excited State 15: Singlet-EU 2.5921 eV 478.31 nm f=0.0052 <S\*\*2>=0.000  
291 -> 297 -0.47488  
295 -> 301 0.50577

Excited state symmetry could not be determined.

Excited State 16: Singlet-?Sym 2.6148 eV 474.15 nm f=0.0000 <S\*\*2>=0.000  
292 -> 297 -0.49676  
293 -> 296 0.49676

Excited state symmetry could not be determined.

Excited State 17: Singlet-?Sym 2.7412 eV 452.29 nm f=0.0001 <S\*\*2>=0.000  
284 -> 299 -0.20237  
288 -> 297 -0.39918  
288 -> 300 0.14943  
289 -> 296 0.39918  
289 -> 301 0.14943  
290 -> 298 0.29663

Excited state symmetry could not be determined.

Excited State 18: Singlet-?Sym 2.7515 eV 450.61 nm f=0.0000 <S\*\*2>=0.000  
284 -> 298 -0.23525  
288 -> 297 0.40678  
288 -> 300 -0.15088  
289 -> 296 0.40678

289 -> 301 0.15088  
290 -> 299 0.24550

Excited State 19: Singlet-EG 2.8389 eV 436.74 nm f=0.0000 <S\*\*2>=0.000

284 -> 296 0.35465  
284 -> 297 -0.42156  
288 -> 298 0.18805  
288 -> 299 -0.16757  
289 -> 298 -0.15820  
289 -> 299 -0.14097  
290 -> 300 0.16686  
290 -> 301 -0.14038

Excited State 20: Singlet-EG 2.8389 eV 436.74 nm f=0.0000 <S\*\*2>=0.000

284 -> 296 0.42156  
284 -> 297 0.35465  
288 -> 298 -0.15820  
288 -> 299 0.14097  
289 -> 298 -0.18805  
289 -> 299 -0.16757  
290 -> 300 -0.14038  
290 -> 301 -0.16686

Excited state symmetry could not be determined.

Excited State 21: Singlet-?Sym 2.8420 eV 436.25 nm f=0.0000 <S\*\*2>=0.000

288 -> 296 0.48836  
289 -> 297 0.48835

Excited state symmetry could not be determined.

Excited State 22: Singlet-?Sym 2.8447 eV 435.84 nm f=0.0000 <S\*\*2>=0.000

288 -> 296 -0.48975  
289 -> 297 0.48976

Excited state symmetry could not be determined.

Excited State 23: Singlet-?Sym 3.0825 eV 402.22 nm f=0.0000 <S\*\*2>=0.000

285 -> 296 -0.36781  
286 -> 297 0.36781  
291 -> 299 -0.21405  
292 -> 300 0.14507  
293 -> 301 0.14507  
294 -> 298 -0.36255

Excited State 24: Singlet-B1G 3.0826 eV 402.21 nm f=0.0000 <S\*\*2>=0.000

285 -> 296 -0.25220  
286 -> 297 -0.25220  
291 -> 298 0.39200  
292 -> 300 0.19324  
293 -> 301 -0.19324  
294 -> 299 0.34496  
295 -> 302 -0.10342

Excited State 25: Singlet-EU 3.0939 eV 400.74 nm f=0.3062 <S\*\*2>=0.000

283 -> 296 0.14454  
283 -> 297 -0.12736  
287 -> 296 -0.28460  
287 -> 297 -0.25077  
291 -> 300 0.12181  
291 -> 301 -0.10733  
292 -> 298 0.29539  
292 -> 299 -0.21471

293 -> 298 0.26028  
293 -> 299 0.18918  
294 -> 300 -0.13284  
294 -> 301 -0.11705

Excited State 26: Singlet-EU 3.0939 eV 400.74 nm f=0.3062 <S\*\*2>=0.000

283 -> 296 -0.12736  
283 -> 297 -0.14454  
287 -> 296 0.25077  
287 -> 297 -0.28460  
291 -> 300 -0.10733  
291 -> 301 -0.12181  
292 -> 298 -0.26028  
292 -> 299 0.18918  
293 -> 298 0.29539  
293 -> 299 0.21471  
294 -> 300 0.11705  
294 -> 301 -0.13284

Excited State 27: Singlet-EG 3.0945 eV 400.66 nm f=0.0000 <S\*\*2>=0.000

282 -> 296 0.35424  
282 -> 297 0.26354  
284 -> 296 -0.29885  
284 -> 297 0.22234  
284 -> 300 0.11341  
284 -> 301 0.15244  
288 -> 298 0.12550  
288 -> 299 -0.12594  
289 -> 298 -0.16869  
289 -> 299 -0.16929  
290 -> 300 0.10428  
290 -> 301 -0.14017

Excited State 28: Singlet-EG 3.0945 eV 400.66 nm f=0.0000 <S\*\*2>=0.000

282 -> 296 -0.26354  
282 -> 297 0.35424  
284 -> 296 0.22234  
284 -> 297 0.29885  
284 -> 300 0.15244  
284 -> 301 -0.11341  
288 -> 298 0.16869  
288 -> 299 -0.16929  
289 -> 298 0.12550  
289 -> 299 0.12594  
290 -> 300 0.14017  
290 -> 301 0.10428

Excited state symmetry could not be determined.

Excited State 29: Singlet-?Sym 3.1262 eV 396.59 nm f=0.0000 <S\*\*2>=0.000

285 -> 297 0.49262  
286 -> 296 0.49262

Excited state symmetry could not be determined.

Excited State 30: Singlet-?Sym 3.1362 eV 395.33 nm f=0.0000 <S\*\*2>=0.000

285 -> 297 -0.49248  
286 -> 296 0.49248

Excited state symmetry could not be determined.

Excited State 31: Singlet-?Sym 3.1475 eV 393.92 nm f=0.0000 <S\*\*2>=0.000

285 -> 296 0.42675

|                                                                         |          |
|-------------------------------------------------------------------------|----------|
| 286 -> 297                                                              | 0.42675  |
| 291 -> 298                                                              | 0.23506  |
| 294 -> 299                                                              | 0.19939  |
| 295 -> 302                                                              | -0.13366 |
| Excited State 32: Singlet-EU 3.1496 eV 393.64 nm f=0.7871 <S**2>=0.000  |          |
| 283 -> 297                                                              | -0.19979 |
| 287 -> 296                                                              | -0.18980 |
| 287 -> 297                                                              | 0.54832  |
| 293 -> 298                                                              | 0.22595  |
| 293 -> 299                                                              | 0.14803  |
| Excited State 33: Singlet-EU 3.1496 eV 393.64 nm f=0.7871 <S**2>=0.000  |          |
| 283 -> 296                                                              | 0.19979  |
| 287 -> 296                                                              | 0.54832  |
| 287 -> 297                                                              | 0.18980  |
| 292 -> 298                                                              | 0.22595  |
| 292 -> 299                                                              | -0.14803 |
| Excited State 34: Singlet-B2U 3.1672 eV 391.47 nm f=0.0000 <S**2>=0.000 |          |
| 284 -> 298                                                              | -0.23047 |
| 288 -> 297                                                              | -0.28003 |
| 288 -> 300                                                              | -0.22954 |
| 289 -> 296                                                              | -0.28003 |
| 289 -> 301                                                              | 0.22954  |
| 290 -> 299                                                              | 0.41751  |
| Excited State 35: Singlet-A2U 3.1723 eV 390.83 nm f=0.0002 <S**2>=0.000 |          |
| 284 -> 299                                                              | -0.23081 |
| 288 -> 297                                                              | 0.29517  |
| 288 -> 300                                                              | 0.21442  |
| 289 -> 296                                                              | -0.29517 |
| 289 -> 301                                                              | 0.21442  |
| 290 -> 298                                                              | 0.41750  |
| Excited State 36: Singlet-A1G 3.2368 eV 383.04 nm f=0.0000 <S**2>=0.000 |          |
| 285 -> 296                                                              | -0.27407 |
| 286 -> 297                                                              | 0.27407  |
| 294 -> 298                                                              | 0.58109  |
| Excited State 37: Singlet-EU 3.2379 eV 382.92 nm f=0.2793 <S**2>=0.000  |          |
| 281 -> 297                                                              | 0.22226  |
| 283 -> 296                                                              | 0.58464  |
| 292 -> 298                                                              | -0.30379 |
| Excited State 38: Singlet-EU 3.2379 eV 382.92 nm f=0.2793 <S**2>=0.000  |          |
| 281 -> 296                                                              | -0.22226 |
| 283 -> 297                                                              | 0.58464  |
| 293 -> 298                                                              | 0.30379  |
| Excited State 39: Singlet-B1G 3.2566 eV 380.72 nm f=0.0000 <S**2>=0.000 |          |
| 291 -> 298                                                              | 0.49605  |
| 294 -> 299                                                              | -0.49417 |
| Excited State 40: Singlet-EU 3.2624 eV 380.04 nm f=0.1624 <S**2>=0.000  |          |
| 283 -> 296                                                              | 0.17207  |
| 292 -> 298                                                              | 0.36589  |
| 292 -> 299                                                              | 0.53207  |
| 293 -> 299                                                              | -0.13253 |

Excited State 41: Singlet-EU 3.2624 eV 380.04 nm f=0.1624 <S\*\*2>=0.000  
283 -> 297 0.17207  
292 -> 299 0.13253  
293 -> 298 -0.36589  
293 -> 299 0.53207

Excited State 42: Singlet-EG 3.2728 eV 378.83 nm f=0.0000 <S\*\*2>=0.000  
280 -> 296 0.69630

Excited State 43: Singlet-EG 3.2728 eV 378.83 nm f=0.0000 <S\*\*2>=0.000  
280 -> 297 0.69630

Excited State 44: Singlet-A1G 3.2866 eV 377.24 nm f=0.0000 <S\*\*2>=0.000  
285 -> 296 -0.18807  
286 -> 297 0.18807  
291 -> 299 0.61284  
292 -> 300 -0.14086  
293 -> 301 -0.14086  
294 -> 298 -0.10101

Excited State 45: Singlet-EG 3.2882 eV 377.06 nm f=0.0000 <S\*\*2>=0.000  
282 -> 297 0.50104  
284 -> 297 -0.21232  
284 -> 300 -0.13137  
288 -> 298 -0.19562  
288 -> 299 0.21586  
290 -> 297 -0.17096  
290 -> 300 -0.22576

Excited State 46: Singlet-EG 3.2882 eV 377.06 nm f=0.0000 <S\*\*2>=0.000  
282 -> 296 0.50104  
284 -> 296 0.21232  
284 -> 301 -0.13137  
289 -> 298 0.19562  
289 -> 299 0.21586  
290 -> 296 -0.17096  
290 -> 301 0.22576

Excited State 47: Singlet-B1G 3.3985 eV 364.82 nm f=0.0000 <S\*\*2>=0.000  
291 -> 298 0.12944  
292 -> 300 -0.11333  
293 -> 301 0.11333  
294 -> 299 0.21444  
295 -> 302 0.63269

Excited State 48: Singlet-EU 3.4522 eV 359.15 nm f=0.0444 <S\*\*2>=0.000  
291 -> 300 0.13550  
291 -> 301 -0.20553  
293 -> 299 0.11008  
294 -> 300 0.35224  
294 -> 301 0.53428

Excited State 49: Singlet-EU 3.4522 eV 359.15 nm f=0.0444 <S\*\*2>=0.000  
291 -> 300 0.20553  
291 -> 301 0.13550  
292 -> 299 -0.11008  
294 -> 300 0.53428  
294 -> 301 -0.35224

Excited state symmetry could not be determined.

Excited State 50: Singlet-?Sym 3.4576 eV 358.58 nm f=0.0000 <S\*\*2>=0.000  
292 -> 301 -0.49622  
293 -> 300 0.49622

Excited state symmetry could not be determined.

Excited State 51: Singlet-?Sym 3.4579 eV 358.55 nm f=0.0000 <S\*\*2>=0.000  
292 -> 301 0.49674  
293 -> 300 0.49674

Excited State 52: Singlet-EU 3.4719 eV 357.11 nm f=0.1016 <S\*\*2>=0.000  
281 -> 297 -0.26120  
291 -> 300 0.54585  
292 -> 298 -0.17941  
292 -> 299 0.25719  
294 -> 300 -0.15470

Excited State 53: Singlet-EU 3.4719 eV 357.11 nm f=0.1016 <S\*\*2>=0.000  
281 -> 296 0.26120  
291 -> 301 0.54585  
293 -> 298 0.17941  
293 -> 299 0.25719  
294 -> 301 0.15470

Excited state symmetry could not be determined.

Excited State 54: Singlet-?Sym 3.4781 eV 356.48 nm f=0.0000 <S\*\*2>=0.000  
291 -> 299 0.25865  
292 -> 300 0.45202  
293 -> 301 0.45202  
294 -> 298 0.13036

Excited state symmetry could not be determined.

Excited State 55: Singlet-?Sym 3.4850 eV 355.76 nm f=0.0000 <S\*\*2>=0.000  
291 -> 298 0.13808  
292 -> 300 -0.42901  
293 -> 301 0.42901  
294 -> 299 0.21483  
295 -> 302 -0.24618

Excited State 56: Singlet-A2U 3.4946 eV 354.79 nm f=0.0000 <S\*\*2>=0.000  
282 -> 298 0.23448  
284 -> 299 0.35540  
288 -> 300 -0.20611  
289 -> 301 -0.20611  
290 -> 298 0.45608

Excited State 57: Singlet-B2U 3.5603 eV 348.24 nm f=0.0000 <S\*\*2>=0.000  
282 -> 299 0.18037  
284 -> 298 0.40946  
288 -> 300 0.14745  
289 -> 301 -0.14745  
290 -> 299 0.48036

Excited State 58: Singlet-EU 3.6137 eV 343.10 nm f=0.3128 <S\*\*2>=0.000  
281 -> 296 0.10463  
281 -> 297 0.54300  
283 -> 296 -0.14297  
286 -> 298 0.12234  
291 -> 300 0.28778  
295 -> 296 -0.10337



Excited State 59: Singlet-EU 3.6137 eV 343.10 nm f=0.3128 <S\*\*2>=0.000  
281 -> 296 -0.54300  
281 -> 297 0.10463  
283 -> 297 -0.14297  
285 -> 298 -0.12234  
291 -> 301 0.28778  
295 -> 297 -0.10337

Excited State 60: Singlet-EG 3.6438 eV 340.26 nm f=0.0000 <S\*\*2>=0.000  
284 -> 300 -0.10663  
288 -> 298 -0.30284  
289 -> 298 -0.26578  
290 -> 300 0.40438  
290 -> 301 0.35490

Excited State 61: Singlet-EG 3.6438 eV 340.26 nm f=0.0000 <S\*\*2>=0.000  
284 -> 301 -0.10663  
288 -> 298 -0.26578  
289 -> 298 0.30284  
290 -> 300 0.35490  
290 -> 301 -0.40438

Excited State 62: Singlet-EU 3.6456 eV 340.10 nm f=0.0001 <S\*\*2>=0.000  
283 -> 296 -0.11456  
283 -> 301 0.14664  
285 -> 298 0.25877  
285 -> 299 -0.19562  
286 -> 298 -0.41032  
286 -> 299 -0.31018  
287 -> 300 0.12359  
287 -> 301 0.19598

Excited State 63: Singlet-EU 3.6456 eV 340.10 nm f=0.0001 <S\*\*2>=0.000  
283 -> 297 -0.11456  
283 -> 300 -0.14664  
285 -> 298 0.41032  
285 -> 299 -0.31019  
286 -> 298 0.25877  
286 -> 299 0.19562  
287 -> 300 0.19598  
287 -> 301 -0.12359

Excited State 64: Singlet-A2G 3.6495 eV 339.73 nm f=0.0000 <S\*\*2>=0.000  
283 -> 299 0.29370  
285 -> 300 0.22906  
286 -> 301 -0.22906  
287 -> 298 0.53760

Excited State 65: Singlet-B2G 3.6669 eV 338.11 nm f=0.0000 <S\*\*2>=0.000  
283 -> 298 0.39265  
285 -> 300 -0.24782  
286 -> 301 -0.24782  
287 -> 299 0.45438

Excited State 66: Singlet-EG 3.6856 eV 336.40 nm f=0.0000 <S\*\*2>=0.000  
284 -> 300 -0.13403  
288 -> 298 0.34977  
288 -> 299 0.46181  
289 -> 298 -0.15709  
289 -> 299 0.20741

290 -> 300 0.22556  
290 -> 301 -0.10130

Excited State 67: Singlet-EG 3.6856 eV 336.40 nm f=0.0000 <S\*\*2>=0.000  
284 -> 301 0.13403  
288 -> 298 0.15709  
288 -> 299 0.20741  
289 -> 298 0.34977  
289 -> 299 -0.46181  
290 -> 300 0.10130  
290 -> 301 0.22556

Excited state symmetry could not be determined.

Excited State 68: Singlet-?Sym 3.6942 eV 335.62 nm f=0.0000 <S\*\*2>=0.000  
271 -> 297 -0.15082  
272 -> 296 -0.15082  
278 -> 297 -0.44074  
279 -> 296 0.44074  
280 -> 298 0.23097

Excited state symmetry could not be determined.

Excited State 69: Singlet-?Sym 3.7255 eV 332.80 nm f=0.0000 <S\*\*2>=0.000  
271 -> 296 -0.12180  
272 -> 297 -0.12180  
278 -> 296 -0.44987  
279 -> 297 0.44987  
284 -> 298 0.18752

Excited state symmetry could not be determined.

Excited State 70: Singlet-?Sym 3.7646 eV 329.34 nm f=0.0002 <S\*\*2>=0.000  
271 -> 296 0.10999  
272 -> 297 -0.11000  
278 -> 296 0.44502  
279 -> 297 0.44502  
282 -> 298 0.10629  
284 -> 299 -0.17975

SavETr: write IOETm= 770 NScale= 10 NData= 16 NLR=1 LETran= 1270.

Leave Link 914 at Tue Jul 22 12:24:58 2014, MaxMem= 2359296000 cpu: 1756552.9

(Enter /usr/local/g09/l601.exe)

Copying SCF densities to generalized density rwf, IOpCl= 0 IROHF=0.

NC Excitation energies and oscillator strengths:

Excited State 1: Singlet-EU 1.5510 eV 799.38 nm f=1.2592 <S\*\*2>=0.000  
295 -> 296 0.60192  
295 -> 297 -0.36597

This state for optimization and/or second-order correction.

Total Energy, E(TD-HF/TD-KS) = -7560.91906521

Copying the excited state density for this state as the 1-particle RhoCI density.

Excited State 2: Singlet-EU 1.5510 eV 799.38 nm f=1.2592 <S\*\*2>=0.000  
295 -> 296 0.36597  
295 -> 297 0.60192

Excited State 3: Singlet-B2G 2.5329 eV 489.50 nm f=0.0000 <S\*\*2>=0.000  
295 -> 298 0.69393

Excited State 4: Singlet-EU 2.6235 eV 472.60 nm f=0.4055 <S\*\*2>=0.000  
291 -> 297 0.12620  
294 -> 296 0.66962

294 -> 297 0.16392

Excited State 5: Singlet-EU 2.6235 eV 472.60 nm f=0.4055 <S\*\*2>=0.000

291 -> 296 -0.12620  
294 -> 296 -0.16392  
294 -> 297 0.66962

Excited State 6: Singlet-A2G 2.6251 eV 472.30 nm f=0.0000 <S\*\*2>=0.000

289 -> 296 -0.16818  
290 -> 297 -0.16818  
292 -> 297 -0.19676  
293 -> 296 -0.19676  
295 -> 299 0.60138

Excited state symmetry could not be determined.

Excited State 7: Singlet-?Sym 2.6362 eV 470.31 nm f=0.0000 <S\*\*2>=0.000

289 -> 297 0.15109  
290 -> 296 0.15109  
292 -> 296 0.47310  
293 -> 297 0.47310

Excited state symmetry could not be determined.

Excited State 8: Singlet-?Sym 2.6450 eV 468.76 nm f=0.0000 <S\*\*2>=0.000

292 -> 297 0.45661  
293 -> 296 0.45661  
295 -> 299 0.26920

Excited state symmetry could not be determined.

Excited State 9: Singlet-?Sym 2.6713 eV 464.14 nm f=0.0000 <S\*\*2>=0.000

289 -> 296 0.29271  
290 -> 297 -0.29271  
292 -> 297 -0.40249  
293 -> 296 0.40249

Excited state symmetry could not be determined.

Excited State 10: Singlet-?Sym 2.6795 eV 462.71 nm f=0.0000 <S\*\*2>=0.000

289 -> 297 0.15330  
290 -> 296 -0.15330  
292 -> 296 0.47048  
293 -> 297 -0.47048

Excited State 11: Singlet-EU 2.7146 eV 456.73 nm f=0.0106 <S\*\*2>=0.000

288 -> 296 -0.14389  
288 -> 297 -0.21248  
291 -> 296 -0.31067  
291 -> 297 0.45875  
295 -> 300 0.18148  
295 -> 301 0.26798

Excited State 12: Singlet-EU 2.7146 eV 456.73 nm f=0.0106 <S\*\*2>=0.000

288 -> 296 0.21248  
288 -> 297 -0.14389  
291 -> 296 0.45875  
291 -> 297 0.31067  
295 -> 300 -0.26798  
295 -> 301 0.18148

Excited state symmetry could not be determined.

Excited State 13: Singlet-?Sym 2.7326 eV 453.72 nm f=0.0000 <S\*\*2>=0.000

289 -> 296 0.39425

290 -> 297 -0.39425  
292 -> 297 0.28999  
293 -> 296 -0.28999  
295 -> 298 -0.12409

Excited state symmetry could not be determined.

Excited State 14: Singlet-?Sym 2.7327 eV 453.71 nm f=0.0000 <S\*\*2>=0.000  
289 -> 296 0.46356  
290 -> 297 0.46356  
295 -> 299 0.25102

Excited State 15: Singlet-EU 2.7650 eV 448.41 nm f=0.6819 <S\*\*2>=0.000  
288 -> 296 0.13073  
288 -> 297 0.55160  
291 -> 297 0.35800  
295 -> 301 -0.18884

Excited State 16: Singlet-EU 2.7650 eV 448.41 nm f=0.6819 <S\*\*2>=0.000  
288 -> 296 0.55160  
288 -> 297 -0.13073  
291 -> 296 -0.35800  
295 -> 300 -0.18884

Excited state symmetry could not be determined.

Excited State 17: Singlet-?Sym 2.7660 eV 448.25 nm f=0.0000 <S\*\*2>=0.000  
289 -> 297 0.47365  
290 -> 296 0.47365  
292 -> 296 -0.15372  
293 -> 297 -0.15372

Excited State 18: Singlet-EU 2.7848 eV 445.22 nm f=0.0132 <S\*\*2>=0.000  
288 -> 297 0.32396  
291 -> 297 -0.18239  
295 -> 301 0.59320

Excited State 19: Singlet-EU 2.7848 eV 445.22 nm f=0.0132 <S\*\*2>=0.000  
288 -> 296 0.32396  
291 -> 296 0.18239  
295 -> 300 0.59320

Excited state symmetry could not be determined.

Excited State 20: Singlet-?Sym 2.8331 eV 437.63 nm f=0.0000 <S\*\*2>=0.000  
289 -> 297 -0.47439  
290 -> 296 0.47439  
292 -> 296 0.15061  
293 -> 297 -0.15061

Excited State 21: Singlet-B1G 3.0028 eV 412.89 nm f=0.0000 <S\*\*2>=0.000  
295 -> 302 0.70234

Excited State 22: Singlet-EG 3.0477 eV 406.82 nm f=0.0000 <S\*\*2>=0.000  
286 -> 296 0.61414  
286 -> 297 -0.34647

Excited State 23: Singlet-EG 3.0477 eV 406.82 nm f=0.0000 <S\*\*2>=0.000  
286 -> 296 0.34647  
286 -> 297 0.61414

Excited State 24: Singlet-EU 3.1298 eV 396.14 nm f=0.0004 <S\*\*2>=0.000  
285 -> 297 -0.13710

287 -> 296 0.65785  
 287 -> 297 -0.18237

Excited State 25: Singlet-EU 3.1298 eV 396.14 nm f=0.0004 <S\*\*2>=0.000  
 285 -> 296 0.13710  
 287 -> 296 0.18237  
 287 -> 297 0.65785

Excited State 26: Singlet-EG 3.5634 eV 347.94 nm f=0.0000 <S\*\*2>=0.000  
 284 -> 296 0.57958  
 284 -> 297 -0.39503

Excited State 27: Singlet-EG 3.5634 eV 347.94 nm f=0.0000 <S\*\*2>=0.000  
 284 -> 296 0.39503  
 284 -> 297 0.57958

Excited State 28: Singlet-EU 3.6605 eV 338.71 nm f=1.9099 <S\*\*2>=0.000  
 285 -> 297 0.43461  
 288 -> 300 -0.20471  
 289 -> 298 0.33666  
 289 -> 299 -0.24351  
 291 -> 300 -0.20656  
 293 -> 298 -0.15406

Excited State 29: Singlet-EU 3.6605 eV 338.71 nm f=1.9099 <S\*\*2>=0.000  
 285 -> 296 0.43461  
 288 -> 301 0.20471  
 290 -> 298 0.33666  
 290 -> 299 0.24351  
 291 -> 301 -0.20656  
 292 -> 298 -0.15406

Excited State 30: Singlet-B1G 3.7017 eV 334.94 nm f=0.0000 <S\*\*2>=0.000  
 288 -> 298 0.45846  
 289 -> 300 -0.22930  
 290 -> 301 0.22930  
 291 -> 299 -0.35020  
 292 -> 301 -0.13325  
 293 -> 300 0.13325

Excited State 31: Singlet-A1G 3.7344 eV 332.00 nm f=0.0000 <S\*\*2>=0.000  
 288 -> 299 -0.30022  
 289 -> 300 -0.24063  
 290 -> 301 -0.24063  
 291 -> 298 0.46033  
 294 -> 302 0.16870  
 295 -> 303 -0.17910

Excited State 32: Singlet-A2G 3.7520 eV 330.45 nm f=0.0000 <S\*\*2>=0.000  
 292 -> 300 -0.14315  
 293 -> 301 0.14315  
 294 -> 298 0.65714

Excited State 33: Singlet-EU 3.7676 eV 329.08 nm f=0.1208 <S\*\*2>=0.000  
 285 -> 296 0.27523  
 287 -> 297 -0.10739  
 290 -> 299 -0.12427  
 292 -> 298 0.52148  
 292 -> 299 -0.16834  
 294 -> 300 -0.22725

Excited State 34: Singlet-EU 3.7676 eV 329.08 nm f=0.1208 <S\*\*2>=0.000  
285 -> 297 0.27523  
287 -> 296 0.10739  
289 -> 299 0.12427  
293 -> 298 0.52148  
293 -> 299 0.16834  
294 -> 301 0.22725

Excited State 35: Singlet-EU 3.7999 eV 326.28 nm f=0.0106 <S\*\*2>=0.000  
285 -> 296 0.17278  
285 -> 297 0.34200  
287 -> 296 0.10328  
288 -> 300 0.10544  
289 -> 298 -0.27434  
289 -> 299 0.13514  
290 -> 298 -0.13860  
291 -> 300 0.10431  
292 -> 298 -0.12544  
292 -> 302 -0.12224  
293 -> 298 -0.24829  
293 -> 299 -0.14836  
295 -> 304 -0.16462

Excited State 36: Singlet-EU 3.7999 eV 326.28 nm f=0.0106 <S\*\*2>=0.000  
285 -> 296 0.34200  
285 -> 297 -0.17278  
287 -> 297 -0.10328  
288 -> 301 -0.10544  
289 -> 298 0.13860  
290 -> 298 -0.27434  
290 -> 299 -0.13514  
291 -> 301 0.10431  
292 -> 298 -0.24829  
292 -> 299 0.14836  
293 -> 298 0.12544  
293 -> 302 0.12224  
295 -> 305 -0.16462

Excited State 37: Singlet-B2G 3.8339 eV 323.39 nm f=0.0000 <S\*\*2>=0.000  
287 -> 298 -0.13007  
292 -> 300 0.23959  
293 -> 301 0.23959  
294 -> 299 0.59173

Excited State 38: Singlet-EU 3.9047 eV 317.53 nm f=0.0091 <S\*\*2>=0.000  
289 -> 299 0.10130  
290 -> 299 0.11527  
292 -> 298 0.22057  
292 -> 299 0.42999  
293 -> 298 -0.19383  
293 -> 299 0.37786  
294 -> 300 0.15228  
294 -> 301 0.13382

Excited State 39: Singlet-EU 3.9047 eV 317.53 nm f=0.0091 <S\*\*2>=0.000  
289 -> 299 0.11527  
290 -> 299 -0.10130  
292 -> 298 -0.19383  
292 -> 299 -0.37786

293 -> 298 -0.22057  
293 -> 299 0.42999  
294 -> 300 -0.13382  
294 -> 301 0.15228

Excited state symmetry could not be determined.

Excited State 40: Singlet-?Sym 3.9373 eV 314.89 nm f=0.0000 <S\*\*2>=0.000  
277 -> 296 0.13314  
278 -> 297 -0.13314  
282 -> 297 0.45673  
283 -> 296 0.45673  
294 -> 298 -0.10961

Excited State 41: Singlet-B1G 3.9666 eV 312.57 nm f=0.0000 <S\*\*2>=0.000  
288 -> 298 0.49243  
291 -> 299 0.47383

Excited State 42: Singlet-EU 3.9678 eV 312.48 nm f=0.0151 <S\*\*2>=0.000  
289 -> 298 0.47427  
289 -> 299 0.42475  
291 -> 300 0.11519  
293 -> 298 -0.12422  
293 -> 299 -0.15165

Excited State 43: Singlet-EU 3.9678 eV 312.48 nm f=0.0151 <S\*\*2>=0.000  
290 -> 298 0.47427  
290 -> 299 -0.42475  
291 -> 301 0.11520  
292 -> 298 -0.12422  
292 -> 299 0.15165

Excited State 44: Singlet-A1G 3.9683 eV 312.44 nm f=0.0000 <S\*\*2>=0.000  
288 -> 299 0.45517  
289 -> 300 0.13815  
290 -> 301 0.13815  
291 -> 298 0.49007

Excited state symmetry could not be determined.

Excited State 45: Singlet-?Sym 3.9802 eV 311.51 nm f=0.0000 <S\*\*2>=0.000  
282 -> 296 0.47360  
283 -> 297 0.47360  
292 -> 301 0.11489  
293 -> 300 -0.11489

Excited state symmetry could not be determined.

Excited State 46: Singlet-?Sym 4.0005 eV 309.92 nm f=0.0000 <S\*\*2>=0.000  
277 -> 296 0.13929  
278 -> 297 0.13929  
282 -> 297 -0.46591  
283 -> 296 0.46591

Excited state symmetry could not be determined.

Excited State 47: Singlet-?Sym 4.0138 eV 308.89 nm f=0.0000 <S\*\*2>=0.000  
282 -> 296 0.48818  
283 -> 297 -0.48818

Excited state symmetry could not be determined.

Excited State 48: Singlet-?Sym 4.0156 eV 308.76 nm f=0.0000 <S\*\*2>=0.000  
275 -> 296 0.48834  
276 -> 297 -0.48834

284 -> 298 0.12440

Excited state symmetry could not be determined.

Excited State 49: Singlet-?Sym 4.0328 eV 307.44 nm f=0.0000 <S\*\*2>=0.000  
275 -> 297 0.49639  
276 -> 296 -0.49638

Excited state symmetry could not be determined.

Excited State 50: Singlet-?Sym 4.0351 eV 307.26 nm f=0.0000 <S\*\*2>=0.000  
282 -> 297 0.10661  
283 -> 296 0.10661  
287 -> 299 0.18055  
289 -> 301 -0.12535  
290 -> 300 0.12535  
292 -> 300 0.41668  
293 -> 301 -0.41668  
294 -> 298 0.22229

Excited State 51: Singlet-EU 4.0429 eV 306.67 nm f=0.0354 <S\*\*2>=0.000  
281 -> 296 0.15117  
281 -> 297 0.58427  
290 -> 299 0.11048  
292 -> 299 0.14593  
294 -> 300 -0.26345

Excited State 52: Singlet-EU 4.0429 eV 306.67 nm f=0.0354 <S\*\*2>=0.000  
281 -> 296 0.58427  
281 -> 297 -0.15117  
289 -> 299 -0.11048  
293 -> 299 -0.14593  
294 -> 301 0.26345

Excited state symmetry could not be determined.

Excited State 53: Singlet-?Sym 4.0547 eV 305.78 nm f=0.0000 <S\*\*2>=0.000  
287 -> 298 -0.21013  
292 -> 300 0.39352  
293 -> 301 0.39352  
294 -> 299 -0.37177

Excited State 54: Singlet-EU 4.0670 eV 304.85 nm f=0.0699 <S\*\*2>=0.000  
281 -> 296 -0.31600  
289 -> 299 -0.16907  
293 -> 299 -0.17397  
294 -> 300 -0.16445  
294 -> 301 0.52539

Excited State 55: Singlet-EU 4.0670 eV 304.85 nm f=0.0699 <S\*\*2>=0.000  
281 -> 297 0.31600  
290 -> 299 -0.16907  
292 -> 299 -0.17397  
294 -> 300 0.52539  
294 -> 301 0.16445

Excited state symmetry could not be determined.

Excited State 56: Singlet-?Sym 4.0707 eV 304.58 nm f=0.0046 <S\*\*2>=0.000  
275 -> 297 0.48563  
276 -> 296 0.48563  
284 -> 302 -0.11966

Excited state symmetry could not be determined.



Excited State 57: Singlet-?Sym 4.0719 eV 304.48 nm f=0.0000 <S\*\*2>=0.000  
282 -> 296 0.12025  
283 -> 297 0.12025  
291 -> 299 0.18201  
292 -> 301 -0.45552  
293 -> 300 0.45552

Excited state symmetry could not be determined.

Excited State 58: Singlet-?Sym 4.0781 eV 304.02 nm f=0.0000 <S\*\*2>=0.000  
275 -> 296 0.49586  
276 -> 297 0.49586

Excited state symmetry could not be determined.

Excited State 59: Singlet-?Sym 4.0793 eV 303.94 nm f=0.0000 <S\*\*2>=0.000  
288 -> 299 -0.13497  
292 -> 301 0.47093  
293 -> 300 0.47093  
295 -> 303 -0.11003

Excited state symmetry could not be determined.

Excited State 60: Singlet-?Sym 4.1383 eV 299.60 nm f=0.0000 <S\*\*2>=0.000  
277 -> 296 -0.16671  
278 -> 297 0.16671  
289 -> 301 -0.43468  
290 -> 300 0.43468  
291 -> 302 0.13081  
292 -> 300 -0.13232  
293 -> 301 0.13232

Excited State 61: Singlet-EU 4.1407 eV 299.43 nm f=0.0665 <S\*\*2>=0.000  
279 -> 297 -0.12637  
288 -> 300 -0.26325  
289 -> 299 -0.16511  
291 -> 300 0.59523

Excited State 62: Singlet-EU 4.1407 eV 299.43 nm f=0.0665 <S\*\*2>=0.000  
279 -> 296 0.12636  
288 -> 301 0.26325  
290 -> 299 0.16511  
291 -> 301 0.59523

Excited state symmetry could not be determined.

Excited State 63: Singlet-?Sym 4.1508 eV 298.70 nm f=0.0000 <S\*\*2>=0.000  
289 -> 301 0.48213  
290 -> 300 0.48213

Excited State 64: Singlet-A1G 4.1563 eV 298.30 nm f=0.0000 <S\*\*2>=0.000  
288 -> 299 0.40922  
289 -> 300 -0.35171  
290 -> 301 -0.35171  
291 -> 298 -0.17498  
292 -> 301 0.13163  
293 -> 300 0.13163

Excited State 65: Singlet-EU 4.1565 eV 298.29 nm f=0.0300 <S\*\*2>=0.000  
279 -> 297 0.13308  
288 -> 300 0.51202  
289 -> 298 0.17301  
289 -> 299 -0.32451  
291 -> 300 0.15366

293 -> 299 0.11677  
295 -> 304 -0.12583

Excited State 66: Singlet-EU 4.1565 eV 298.29 nm f=0.0300 <S\*\*2>=0.000  
279 -> 296 0.13307  
288 -> 301 0.51203  
290 -> 298 -0.17301  
290 -> 299 -0.32451  
291 -> 301 -0.15366  
292 -> 299 0.11677  
295 -> 305 0.12583

Excited state symmetry could not be determined.

Excited State 67: Singlet-?Sym 4.1609 eV 297.98 nm f=0.0000 <S\*\*2>=0.000  
288 -> 298 0.17462  
289 -> 300 0.41676  
290 -> 301 -0.41676  
291 -> 299 -0.33594

Excited state symmetry could not be determined.

Excited State 68: Singlet-?Sym 4.1898 eV 295.92 nm f=0.0000 <S\*\*2>=0.000  
277 -> 296 0.43360  
278 -> 297 -0.43360  
282 -> 297 -0.13813  
283 -> 296 -0.13813  
289 -> 301 -0.17327  
290 -> 300 0.17327

Excited state symmetry could not be determined.

Excited State 69: Singlet-?Sym 4.1949 eV 295.56 nm f=0.0000 <S\*\*2>=0.000  
277 -> 296 0.46795  
278 -> 297 0.46795  
282 -> 297 0.13351  
283 -> 296 -0.13351

Excited State 70: Singlet-EU 4.1980 eV 295.34 nm f=0.0004 <S\*\*2>=0.000  
274 -> 297 -0.16549  
279 -> 296 -0.10621  
279 -> 297 0.61482  
288 -> 300 -0.21152  
295 -> 304 -0.11313

SavETr: write IOETrn= 770 NScale= 10 NData= 16 NLR=1 LETran= 1270.

Leave Link 914 at Sun Jul 20 00:20:20 2014, MaxMem= 2359296000 cpu: 1348588.9  
(Enter /usr/local/g09/l601.exe)

Copying SCF densities to generalized density rwf, IOpCl= 0 IROHF=0.

## 2,3-TQPz

Excitation energies and oscillator strengths:

Excited State 1: Singlet-EU 1.7292 eV 716.98 nm f=1.0524 <S\*\*2>=0.000  
295 -> 296 0.33959  
295 -> 297 0.61196

This state for optimization and/or second-order correction.

Total Energy, E(TD-HF/TD-KS) = -7689.18336470

Copying the excited state density for this state as the 1-particle RhoCI density.

Excited State 2: Singlet-EU 1.7292 eV 716.98 nm f=1.0524 <S\*\*2>=0.000  
295 -> 296 0.61196  
295 -> 297 -0.33959

Excited State 3: Singlet-B2G 2.3405 eV 529.74 nm f=0.0000 <S\*\*2>=0.000  
292 -> 296 -0.14326  
293 -> 297 0.14326  
295 -> 298 0.67360

Excited State 4: Singlet-A2G 2.4038 eV 515.77 nm f=0.0000 <S\*\*2>=0.000  
292 -> 296 -0.37136  
293 -> 297 -0.37136  
295 -> 299 0.46812

Excited State 5: Singlet-EU 2.4374 eV 508.68 nm f=0.0075 <S\*\*2>=0.000  
291 -> 296 0.13719  
294 -> 296 0.66474  
294 -> 297 -0.14512

Excited State 6: Singlet-EU 2.4374 eV 508.68 nm f=0.0075 <S\*\*2>=0.000  
291 -> 297 -0.13719  
294 -> 296 0.14512  
294 -> 297 0.66474

Excited state symmetry could not be determined.

Excited State 7: Singlet-?Sym 2.4438 eV 507.35 nm f=0.0000 <S\*\*2>=0.000  
292 -> 296 0.47181  
293 -> 297 -0.47181  
295 -> 298 0.20486

Excited State 8: Singlet-EU 2.4644 eV 503.10 nm f=0.7062 <S\*\*2>=0.000  
291 -> 296 0.67048  
291 -> 297 0.14454  
294 -> 296 -0.13812

Excited State 9: Singlet-EU 2.4644 eV 503.10 nm f=0.7062 <S\*\*2>=0.000  
291 -> 296 -0.14454  
291 -> 297 0.67048  
294 -> 297 0.13812

Excited state symmetry could not be determined.

Excited State 10: Singlet-?Sym 2.4649 eV 502.99 nm f=0.0000 <S\*\*2>=0.000  
292 -> 297 0.49147  
293 -> 296 0.49147

Excited State 11: Singlet-A2G 2.4692 eV 502.13 nm f=0.0000 <S\*\*2>=0.000  
292 -> 296 0.33102  
293 -> 297 0.33102  
295 -> 299 0.52621

Excited state symmetry could not be determined.

Excited State 12: Singlet-?Sym 2.4779 eV 500.35 nm f=0.0000 <S\*\*2>=0.000  
288 -> 296 -0.15024  
289 -> 297 0.15024  
292 -> 297 -0.47414  
293 -> 296 0.47414

Excited state symmetry could not be determined.

Excited State 13: Singlet-?Sym 2.6115 eV 474.76 nm f=0.0000 <S\*\*2>=0.000  
288 -> 297 0.49546  
289 -> 296 0.49546

Excited State 14: Singlet-EU 2.6126 eV 474.57 nm f=0.2721 <S\*\*2>=0.000  
290 -> 296 0.13364

290 -> 297 0.68209

Excited State 15: Singlet-EU 2.6126 eV 474.57 nm f=0.2721 <S\*\*2>=0.000

290 -> 296 0.68209

290 -> 297 -0.13364

Excited state symmetry could not be determined.

Excited State 16: Singlet-?Sym 2.6163 eV 473.89 nm f=0.0000 <S\*\*2>=0.000

288 -> 296 0.49085

289 -> 297 0.49085

Excited state symmetry could not be determined.

Excited State 17: Singlet-?Sym 2.6260 eV 472.14 nm f=0.0000 <S\*\*2>=0.000

288 -> 297 -0.49182

289 -> 296 0.49182

Excited State 18: Singlet-EU 2.6378 eV 470.03 nm f=0.2637 <S\*\*2>=0.000

295 -> 301 0.69345

Excited State 19: Singlet-EU 2.6378 eV 470.03 nm f=0.2637 <S\*\*2>=0.000

295 -> 300 0.69345

Excited state symmetry could not be determined.

Excited State 20: Singlet-?Sym 2.6710 eV 464.19 nm f=0.0000 <S\*\*2>=0.000

288 -> 296 -0.46488

289 -> 297 0.46488

292 -> 297 0.15497

293 -> 296 -0.15497

Excited State 21: Singlet-EG 2.6922 eV 460.53 nm f=0.0000 <S\*\*2>=0.000

286 -> 296 -0.27838

286 -> 297 0.63338

Excited State 22: Singlet-EG 2.6922 eV 460.53 nm f=0.0000 <S\*\*2>=0.000

286 -> 296 0.63338

286 -> 297 0.27838

Excited State 23: Singlet-EU 2.8605 eV 433.44 nm f=0.0439 <S\*\*2>=0.000

287 -> 296 0.60003

287 -> 297 -0.28736

292 -> 298 -0.10710

Excited State 24: Singlet-EU 2.8605 eV 433.44 nm f=0.0439 <S\*\*2>=0.000

287 -> 296 0.28736

287 -> 297 0.60003

293 -> 298 0.10710

Excited state symmetry could not be determined.

Excited State 25: Singlet-?Sym 3.0896 eV 401.29 nm f=0.0029 <S\*\*2>=0.000

283 -> 299 -0.13831

284 -> 297 -0.43648

284 -> 300 -0.10757

285 -> 296 0.43648

285 -> 301 -0.10757

286 -> 298 -0.26106

Excited state symmetry could not be determined.

Excited State 26: Singlet-?Sym 3.1043 eV 399.40 nm f=0.0000 <S\*\*2>=0.000

283 -> 298 0.17583

284 -> 297 0.45142

284 -> 300 0.10485  
285 -> 296 0.45142  
285 -> 301 -0.10485  
286 -> 299 0.17837

Excited state symmetry could not be determined.

Excited State 27: Singlet-?Sym 3.1127 eV 398.31 nm f=0.0000 <S\*\*2>=0.000

284 -> 296 0.49107  
285 -> 297 0.49107

Excited state symmetry could not be determined.

Excited State 28: Singlet-?Sym 3.1181 eV 397.63 nm f=0.0000 <S\*\*2>=0.000

284 -> 296 -0.49314  
285 -> 297 0.49314

Excited State 29: Singlet-B1G 3.1491 eV 393.71 nm f=0.0000 <S\*\*2>=0.000

291 -> 298 0.51907  
292 -> 300 -0.20046  
293 -> 301 0.20046  
294 -> 299 0.35161  
295 -> 302 -0.10423

Excited State 30: Singlet-EU 3.1760 eV 390.38 nm f=1.1140 <S\*\*2>=0.000

282 -> 296 -0.16727  
287 -> 297 -0.12534  
291 -> 301 0.14181  
292 -> 298 0.25724  
292 -> 299 0.14379  
293 -> 298 0.46234  
293 -> 299 -0.25843  
294 -> 301 -0.15677

Excited State 31: Singlet-EU 3.1760 eV 390.38 nm f=1.1140 <S\*\*2>=0.000

282 -> 297 -0.16727  
287 -> 296 0.12534  
291 -> 300 -0.14181  
292 -> 298 0.46234  
292 -> 299 0.25843  
293 -> 298 -0.25724  
293 -> 299 0.14379  
294 -> 300 -0.15677

Excited State 32: Singlet-A1G 3.2168 eV 385.43 nm f=0.0000 <S\*\*2>=0.000

291 -> 299 0.20641  
292 -> 300 -0.14019  
293 -> 301 -0.14019  
294 -> 298 0.62018

Excited State 33: Singlet-EG 3.2281 eV 384.08 nm f=0.0000 <S\*\*2>=0.000

283 -> 296 0.20384  
283 -> 297 0.57265  
284 -> 298 0.20020  
284 -> 299 0.16088  
286 -> 300 0.17159

Excited State 34: Singlet-EG 3.2281 eV 384.08 nm f=0.0000 <S\*\*2>=0.000

283 -> 296 0.57265  
283 -> 297 -0.20384  
285 -> 298 0.20020  
285 -> 299 -0.16088

286 -> 301 0.17159

Excited State 35: Singlet-EU 3.2997 eV 375.75 nm f=0.0415 <S\*\*2>=0.000  
 287 -> 301 -0.12575  
 288 -> 298 -0.25375  
 288 -> 299 -0.15796  
 289 -> 298 0.43373  
 289 -> 299 -0.27000  
 290 -> 300 0.10272  
 290 -> 301 0.17558  
 292 -> 298 -0.13374  
 292 -> 299 0.18305  
 293 -> 299 0.10709

Excited State 36: Singlet-EU 3.2997 eV 375.75 nm f=0.0415 <S\*\*2>=0.000  
 287 -> 300 -0.12575  
 288 -> 298 0.43373  
 288 -> 299 0.27000  
 289 -> 298 0.25375  
 289 -> 299 -0.15796  
 290 -> 300 -0.17558  
 290 -> 301 0.10272  
 292 -> 299 0.10709  
 293 -> 298 -0.13374  
 293 -> 299 -0.18304

Excited State 37: Singlet-B1G 3.3021 eV 375.47 nm f=0.0000 <S\*\*2>=0.000  
 291 -> 298 -0.44201  
 294 -> 299 0.49585  
 295 -> 302 -0.20725

Excited State 38: Singlet-A2G 3.3056 eV 375.07 nm f=0.0000 <S\*\*2>=0.000  
 287 -> 299 0.18621  
 288 -> 300 -0.20557  
 289 -> 301 0.20557  
 290 -> 298 0.60697

Excited State 39: Singlet-EU 3.3114 eV 374.42 nm f=0.0703 <S\*\*2>=0.000  
 288 -> 298 0.15523  
 288 -> 299 0.10583  
 289 -> 298 0.12650  
 292 -> 298 0.23606  
 292 -> 299 -0.32539  
 293 -> 298 0.28968  
 293 -> 299 0.39931

Excited State 40: Singlet-EU 3.3114 eV 374.42 nm f=0.0703 <S\*\*2>=0.000  
 288 -> 298 0.12650  
 289 -> 298 -0.15523  
 289 -> 299 0.10583  
 292 -> 298 -0.28968  
 292 -> 299 0.39931  
 293 -> 298 0.23606  
 293 -> 299 0.32539

Excited State 41: Singlet-A1G 3.3208 eV 373.35 nm f=0.0000 <S\*\*2>=0.000  
 291 -> 299 0.60831  
 292 -> 300 -0.13237  
 293 -> 301 -0.13237  
 294 -> 298 -0.28992

Excited State 42: Singlet-B1G 3.3274 eV 372.61 nm f=0.0000 <S\*\*2>=0.000  
294 -> 299 0.22006  
295 -> 302 0.65707

Excited State 43: Singlet-EG 3.3349 eV 371.78 nm f=0.0000 <S\*\*2>=0.000  
281 -> 296 0.14420  
281 -> 297 0.68358

Excited State 44: Singlet-EG 3.3349 eV 371.78 nm f=0.0000 <S\*\*2>=0.000  
281 -> 296 0.68358  
281 -> 297 -0.14420

Excited State 45: Singlet-B2G 3.3518 eV 369.91 nm f=0.0000 <S\*\*2>=0.000  
287 -> 298 0.27648  
288 -> 300 -0.25184  
289 -> 301 -0.25184  
290 -> 299 0.53143

Excited State 46: Singlet-EG 3.3921 eV 365.50 nm f=0.0000 <S\*\*2>=0.000  
280 -> 296 0.60699  
283 -> 296 -0.21235  
283 -> 301 -0.12975  
285 -> 298 0.15551  
285 -> 299 -0.13903  
286 -> 301 0.11039

Excited State 47: Singlet-EG 3.3921 eV 365.50 nm f=0.0000 <S\*\*2>=0.000  
280 -> 297 0.60699  
283 -> 297 0.21235  
283 -> 300 -0.12975  
284 -> 298 -0.15551  
284 -> 299 -0.13903  
286 -> 300 -0.11039

Excited State 48: Singlet-EU 3.4823 eV 356.04 nm f=0.0046 <S\*\*2>=0.000  
289 -> 298 0.41466  
289 -> 299 0.55421  
290 -> 301 -0.12156

Excited State 49: Singlet-EU 3.4823 eV 356.04 nm f=0.0046 <S\*\*2>=0.000  
288 -> 298 -0.41466  
288 -> 299 0.55421  
290 -> 300 -0.12156

Excited State 50: Singlet-A2U 3.5192 eV 352.31 nm f=0.0047 <S\*\*2>=0.000  
283 -> 299 0.18508  
284 -> 297 -0.23510  
284 -> 300 0.18965  
285 -> 296 0.23510  
285 -> 301 0.18965  
286 -> 298 0.52503

Excited State 51: Singlet-EU 3.5218 eV 352.04 nm f=0.0355 <S\*\*2>=0.000  
291 -> 301 0.20536  
293 -> 299 -0.14124  
294 -> 300 0.18067  
294 -> 301 0.62060

Excited State 52: Singlet-EU 3.5218 eV 352.04 nm f=0.0355 <S\*\*2>=0.000

291 -> 300 -0.20536  
292 -> 299 0.14124  
294 -> 300 0.62060  
294 -> 301 -0.18067

Excited state symmetry could not be determined.

Excited State 53: Singlet-?Sym 3.5264 eV 351.58 nm f=0.0000 <S\*\*2>=0.000  
292 -> 301 0.49452  
293 -> 300 0.49452

Excited state symmetry could not be determined.

Excited State 54: Singlet-?Sym 3.5282 eV 351.41 nm f=0.0000 <S\*\*2>=0.000  
292 -> 301 -0.49569  
293 -> 300 0.49569

Excited State 55: Singlet-B2U 3.5297 eV 351.26 nm f=0.0000 <S\*\*2>=0.000  
283 -> 298 0.21546  
284 -> 297 -0.19751  
284 -> 300 0.22837  
285 -> 296 -0.19751  
285 -> 301 -0.22837  
286 -> 299 0.50146

Excited State 56: Singlet-EU 3.5316 eV 351.07 nm f=0.1332 <S\*\*2>=0.000  
282 -> 297 0.26021  
291 -> 300 0.56153  
292 -> 298 0.15834  
292 -> 299 0.25328  
294 -> 300 0.12789

Excited State 57: Singlet-EU 3.5316 eV 351.07 nm f=0.1332 <S\*\*2>=0.000  
282 -> 296 -0.26021  
291 -> 301 0.56153  
293 -> 298 -0.15834  
293 -> 299 0.25328  
294 -> 301 -0.12789

Excited state symmetry could not be determined.

Excited State 58: Singlet-?Sym 3.5354 eV 350.69 nm f=0.0000 <S\*\*2>=0.000  
291 -> 298 -0.15741  
292 -> 300 -0.44268  
293 -> 301 0.44268  
294 -> 299 -0.27739

Excited state symmetry could not be determined.

Excited State 59: Singlet-?Sym 3.5385 eV 350.39 nm f=0.0000 <S\*\*2>=0.000  
291 -> 299 0.27529  
292 -> 300 0.44197  
293 -> 301 0.44197  
294 -> 298 0.13452

Excited State 60: Singlet-A2G 3.5877 eV 345.58 nm f=0.0000 <S\*\*2>=0.000  
287 -> 299 0.40329  
288 -> 300 -0.32479  
289 -> 301 0.32479  
290 -> 298 -0.35002

Excited State 61: Singlet-B2G 3.5974 eV 344.65 nm f=0.0000 <S\*\*2>=0.000  
287 -> 298 0.52893  
288 -> 300 -0.14646



289 -> 301 -0.14646  
290 -> 299 -0.41661

Excited State 62: Singlet-EU 3.6304 eV 341.51 nm f=0.5945 <S\*\*2>=0.000  
282 -> 296 0.53453  
287 -> 297 -0.12393  
287 -> 300 -0.14021  
290 -> 300 0.24424  
291 -> 301 0.26792

Excited State 63: Singlet-EU 3.6304 eV 341.51 nm f=0.5945 <S\*\*2>=0.000  
282 -> 297 0.53453  
287 -> 296 0.12393  
287 -> 301 -0.14021  
290 -> 301 -0.24424  
291 -> 300 -0.26792

Excited State 64: Singlet-EG 3.6311 eV 341.45 nm f=0.0000 <S\*\*2>=0.000  
280 -> 297 0.32098  
283 -> 297 -0.27376  
283 -> 300 0.18113  
284 -> 298 0.26552  
284 -> 299 0.28400  
286 -> 300 0.34086

Excited State 65: Singlet-EG 3.6311 eV 341.45 nm f=0.0000 <S\*\*2>=0.000  
280 -> 296 -0.32098  
283 -> 296 -0.27376  
283 -> 301 -0.18113  
285 -> 298 0.26552  
285 -> 299 -0.28400  
286 -> 301 0.34086

Excited state symmetry could not be determined.

Excited State 66: Singlet-?Sym 3.7036 eV 334.77 nm f=0.0000 <S\*\*2>=0.000  
288 -> 301 -0.49256  
289 -> 300 0.49256

Excited State 67: Singlet-EU 3.7073 eV 334.43 nm f=0.0023 <S\*\*2>=0.000  
282 -> 296 -0.19570  
288 -> 298 0.12784  
288 -> 299 0.22645  
290 -> 300 0.59400

Excited State 68: Singlet-EU 3.7073 eV 334.43 nm f=0.0023 <S\*\*2>=0.000  
282 -> 297 0.19571  
289 -> 298 -0.12784  
289 -> 299 0.22645  
290 -> 301 0.59400

Excited state symmetry could not be determined.

Excited State 69: Singlet-?Sym 3.7139 eV 333.84 nm f=0.0000 <S\*\*2>=0.000  
288 -> 301 0.48674  
289 -> 300 0.48674  
292 -> 300 -0.10049  
293 -> 301 -0.10049

Excited state symmetry could not be determined.

Excited State 70: Singlet-?Sym 3.7354 eV 331.92 nm f=0.0000 <S\*\*2>=0.000  
287 -> 298 0.36863

288 -> 300 0.40348  
289 -> 301 0.40348  
290 -> 299 0.18933

SavETr: write IOETrn= 770 NScale= 10 NData= 16 NLR=1 LETran= 1270.  
Leave Link 914 at Sat Jul 19 02:43:00 2014, MaxMem= 2359296000 cpu: 1383131.9  
(Enter /usr/local/g09/l601.exe)  
Copying SCF densities to generalized density rwf, IOpCl= 0 IROHF=0.

## 6,7-TQPz

Excitation energies and oscillator strengths:

Excited State 1: Singlet-EU 1.6670 eV 743.76 nm f=1.1882 <S\*\*2>=0.000  
295 -> 296 0.39106  
295 -> 297 0.58354

This state for optimization and/or second-order correction.

Total Energy, E(TD-HF/TD-KS) = -7689.25620417

Copying the excited state density for this state as the 1-particle RhoCI density.

Excited State 2: Singlet-EU 1.6670 eV 743.76 nm f=1.1882 <S\*\*2>=0.000  
295 -> 296 0.58354  
295 -> 297 -0.39106

Excited State 3: Singlet-B2G 2.3563 eV 526.19 nm f=0.0000 <S\*\*2>=0.000  
295 -> 298 0.70377

Excited State 4: Singlet-A2G 2.4173 eV 512.90 nm f=0.0000 <S\*\*2>=0.000  
295 -> 299 0.70306

Excited State 5: Singlet-EU 2.5303 eV 490.01 nm f=0.2012 <S\*\*2>=0.000  
295 -> 300 0.69618

Excited State 6: Singlet-EU 2.5303 eV 490.01 nm f=0.2012 <S\*\*2>=0.000  
295 -> 301 0.69618

Excited state symmetry could not be determined.

Excited State 7: Singlet-?Sym 2.7780 eV 446.31 nm f=0.0000 <S\*\*2>=0.000  
292 -> 296 -0.49145  
293 -> 297 0.49145

Excited state symmetry could not be determined.

Excited State 8: Singlet-?Sym 2.7789 eV 446.16 nm f=0.0000 <S\*\*2>=0.000  
292 -> 296 0.49431  
293 -> 297 0.49431

Excited State 9: Singlet-EU 2.7840 eV 445.34 nm f=0.0273 <S\*\*2>=0.000  
291 -> 297 -0.13770  
294 -> 296 -0.14336  
294 -> 297 0.66749

Excited State 10: Singlet-EU 2.7840 eV 445.34 nm f=0.0273 <S\*\*2>=0.000  
291 -> 296 0.13770  
294 -> 296 0.66749  
294 -> 297 0.14336

Excited state symmetry could not be determined.

Excited State 11: Singlet-?Sym 2.8224 eV 439.29 nm f=0.0000 <S\*\*2>=0.000  
292 -> 297 0.49522  
293 -> 296 0.49522

Excited State 12: Singlet-EU 2.8289 eV 438.27 nm f=0.7186 <S\*\*2>=0.000  
291 -> 296 0.68469  
294 -> 296 -0.14245

Excited State 13: Singlet-EU 2.8289 eV 438.27 nm f=0.7186 <S\*\*2>=0.000  
291 -> 297 0.68469  
294 -> 297 0.14245

Excited state symmetry could not be determined.

Excited State 14: Singlet-?Sym 2.8408 eV 436.44 nm f=0.0000 <S\*\*2>=0.000  
292 -> 297 -0.48977  
293 -> 296 0.48977

Excited State 15: Singlet-EG 2.9783 eV 416.29 nm f=0.0000 <S\*\*2>=0.000  
287 -> 296 0.68339  
287 -> 297 -0.13978

Excited State 16: Singlet-EG 2.9783 eV 416.29 nm f=0.0000 <S\*\*2>=0.000  
287 -> 296 0.13978  
287 -> 297 0.68339

Excited State 17: Singlet-B1G 3.0676 eV 404.18 nm f=0.0000 <S\*\*2>=0.000  
288 -> 296 -0.34825  
289 -> 297 -0.34825  
295 -> 302 0.49850

Excited state symmetry could not be determined.

Excited State 18: Singlet-?Sym 3.0885 eV 401.44 nm f=0.0000 <S\*\*2>=0.000  
288 -> 297 0.49349  
289 -> 296 0.49349

Excited State 19: Singlet-B1G 3.0977 eV 400.25 nm f=0.0000 <S\*\*2>=0.000  
288 -> 296 0.35042  
289 -> 297 0.35042  
295 -> 302 0.49145

Excited State 20: Singlet-EU 3.1014 eV 399.77 nm f=0.3759 <S\*\*2>=0.000  
290 -> 296 0.69195

Excited State 21: Singlet-EU 3.1014 eV 399.77 nm f=0.3759 <S\*\*2>=0.000  
290 -> 297 0.69195

Excited state symmetry could not be determined.

Excited State 22: Singlet-?Sym 3.1382 eV 395.08 nm f=0.0000 <S\*\*2>=0.000  
288 -> 297 -0.49318  
289 -> 296 0.49318

Excited state symmetry could not be determined.

Excited State 23: Singlet-?Sym 3.1500 eV 393.60 nm f=0.0000 <S\*\*2>=0.000  
288 -> 296 -0.47165  
289 -> 297 0.47165  
294 -> 298 -0.10965

Excited State 24: Singlet-EU 3.4246 eV 362.04 nm f=0.3796 <S\*\*2>=0.000  
286 -> 297 0.52192  
291 -> 301 -0.17267  
293 -> 298 -0.27502  
293 -> 299 0.23361  
294 -> 301 0.19352

Excited State 25: Singlet-EU 3.4246 eV 362.04 nm f=0.3796 <S\*\*2>=0.000  
286 -> 296 0.52192  
291 -> 300 -0.17267  
292 -> 298 0.27502  
292 -> 299 0.23361  
294 -> 300 -0.19352

Excited State 26: Singlet-B1G 3.4769 eV 356.59 nm f=0.0000 <S\*\*2>=0.000  
291 -> 298 0.41869  
292 -> 300 -0.27421  
293 -> 301 0.27421  
294 -> 299 0.38351

Excited State 27: Singlet-EU 3.4963 eV 354.62 nm f=1.4196 <S\*\*2>=0.000  
282 -> 296 0.36260  
282 -> 297 0.15187  
286 -> 296 -0.13515  
286 -> 297 0.32268  
291 -> 301 0.16227  
292 -> 298 0.11511  
293 -> 298 0.27483  
293 -> 299 -0.22106  
294 -> 301 -0.16591

Excited State 28: Singlet-EU 3.4963 eV 354.62 nm f=1.4196 <S\*\*2>=0.000  
282 -> 296 -0.15187  
282 -> 297 0.36260  
286 -> 296 -0.32268  
286 -> 297 -0.13515  
291 -> 300 -0.16227  
292 -> 298 0.27483  
292 -> 299 0.22106  
293 -> 298 -0.11511  
294 -> 300 -0.16591

Excited State 29: Singlet-EG 3.4993 eV 354.31 nm f=0.0000 <S\*\*2>=0.000  
280 -> 297 0.69829

Excited State 30: Singlet-EG 3.4993 eV 354.31 nm f=0.0000 <S\*\*2>=0.000  
280 -> 296 0.69829

Excited State 31: Singlet-A1G 3.5553 eV 348.73 nm f=0.0000 <S\*\*2>=0.000  
288 -> 296 -0.12798  
289 -> 297 0.12798  
291 -> 299 0.32071  
292 -> 300 -0.25067  
293 -> 301 -0.25067  
294 -> 298 0.46470  
295 -> 306 -0.10476

Excited state symmetry could not be determined.

Excited State 32: Singlet-?Sym 3.6169 eV 342.79 nm f=0.0053 <S\*\*2>=0.000  
281 -> 298 -0.20467  
283 -> 299 -0.19757  
284 -> 297 0.41916  
284 -> 300 -0.16641  
285 -> 296 0.41916  
285 -> 301 0.16641  
287 -> 298 0.10070

Excited state symmetry could not be determined.

Excited State 33: Singlet-?Sym 3.6178 eV 342.71 nm f=0.0000 <S\*\*2>=0.000  
281 -> 299 0.18655  
283 -> 298 0.21940  
284 -> 297 -0.42022  
284 -> 300 0.16651  
285 -> 296 0.42022  
285 -> 301 0.16651

Excited State 34: Singlet-EG 3.6233 eV 342.18 nm f=0.0000 <S\*\*2>=0.000  
281 -> 296 -0.33938  
281 -> 301 -0.15678  
283 -> 296 0.46357  
283 -> 297 0.11293  
283 -> 301 0.15792  
285 -> 298 0.21482  
285 -> 299 -0.19389

Excited State 35: Singlet-EG 3.6233 eV 342.18 nm f=0.0000 <S\*\*2>=0.000  
281 -> 297 0.33938  
281 -> 300 -0.15678  
283 -> 296 -0.11293  
283 -> 297 0.46357  
283 -> 300 -0.15792  
284 -> 298 -0.21482  
284 -> 299 -0.19389

Excited state symmetry could not be determined.

Excited State 36: Singlet-?Sym 3.6387 eV 340.74 nm f=0.0000 <S\*\*2>=0.000  
284 -> 296 -0.49377  
285 -> 297 0.49377

Excited state symmetry could not be determined.

Excited State 37: Singlet-?Sym 3.6389 eV 340.72 nm f=0.0000 <S\*\*2>=0.000  
284 -> 296 0.49394  
285 -> 297 0.49394

Excited State 38: Singlet-EG 3.6477 eV 339.90 nm f=0.0000 <S\*\*2>=0.000  
281 -> 297 0.53724  
283 -> 297 -0.43805

Excited State 39: Singlet-EG 3.6477 eV 339.90 nm f=0.0000 <S\*\*2>=0.000  
281 -> 296 0.53724  
283 -> 296 0.43805

Excited State 40: Singlet-B1G 3.7321 eV 332.21 nm f=0.0000 <S\*\*2>=0.000  
291 -> 298 0.51240  
294 -> 299 -0.47926

Excited State 41: Singlet-EU 3.7322 eV 332.20 nm f=0.0104 <S\*\*2>=0.000  
292 -> 298 0.18474  
292 -> 299 -0.18467  
293 -> 298 0.45441  
293 -> 299 0.45424

Excited State 42: Singlet-EU 3.7322 eV 332.20 nm f=0.0104 <S\*\*2>=0.000  
292 -> 298 0.45441  
292 -> 299 -0.45424  
293 -> 298 -0.18474

293 -> 299 -0.18467

Excited State 43: Singlet-A1G 3.7352 eV 331.93 nm f=0.0000 <S\*\*2>=0.000

291 -> 299 0.48715

292 -> 300 -0.12081

293 -> 301 -0.12081

294 -> 298 -0.48079

Excited State 44: Singlet-EU 3.7489 eV 330.72 nm f=0.1540 <S\*\*2>=0.000

282 -> 296 -0.14825

282 -> 297 0.50322

286 -> 296 0.28541

292 -> 298 -0.20288

292 -> 299 -0.12599

294 -> 300 0.10354

295 -> 304 -0.14353

Excited State 45: Singlet-EU 3.7489 eV 330.72 nm f=0.1540 <S\*\*2>=0.000

282 -> 296 0.50322

282 -> 297 0.14825

286 -> 297 -0.28541

293 -> 298 -0.20288

293 -> 299 0.12599

294 -> 301 0.10354

295 -> 305 -0.14353

Excited state symmetry could not be determined.

Excited State 46: Singlet-?Sym 3.8545 eV 321.66 nm f=0.0000 <S\*\*2>=0.000

288 -> 300 0.13538

289 -> 301 -0.13538

290 -> 298 -0.26747

292 -> 301 -0.42640

293 -> 300 0.42640

Excited State 47: Singlet-EU 3.8567 eV 321.48 nm f=0.0274 <S\*\*2>=0.000

288 -> 298 0.10247

289 -> 298 0.16093

291 -> 300 -0.24359

291 -> 301 0.15510

292 -> 299 0.13732

294 -> 300 0.46856

294 -> 301 0.29835

Excited State 48: Singlet-EU 3.8567 eV 321.48 nm f=0.0274 <S\*\*2>=0.000

288 -> 298 0.16093

289 -> 298 -0.10247

291 -> 300 0.15510

291 -> 301 0.24359

293 -> 299 -0.13732

294 -> 300 -0.29835

294 -> 301 0.46856

Excited state symmetry could not be determined.

Excited State 49: Singlet-?Sym 3.8613 eV 321.09 nm f=0.0000 <S\*\*2>=0.000

292 -> 301 0.48874

293 -> 300 0.48874

Excited state symmetry could not be determined.

Excited State 50: Singlet-?Sym 3.8866 eV 319.00 nm f=0.0000 <S\*\*2>=0.000

291 -> 298 0.23028

292 -> 300 0.40006  
293 -> 301 -0.40006  
294 -> 299 0.34062

Excited state symmetry could not be determined.

Excited State 51: Singlet-?Sym 3.8914 eV 318.61 nm f=0.0000 <S\*\*2>=0.000

291 -> 299 0.38028  
292 -> 300 0.39869  
293 -> 301 0.39869  
294 -> 298 0.18037

Excited State 52: Singlet-A2G 3.8933 eV 318.45 nm f=0.0000 <S\*\*2>=0.000

278 -> 297 0.19895  
279 -> 296 0.19895  
286 -> 299 0.14001  
288 -> 300 -0.20433  
289 -> 301 0.20433  
290 -> 298 0.42130  
292 -> 301 -0.25216  
293 -> 300 0.25216

Excited State 53: Singlet-EU 3.8944 eV 318.37 nm f=0.0022 <S\*\*2>=0.000

286 -> 300 -0.11708  
288 -> 298 0.36888  
288 -> 299 0.27012  
290 -> 300 -0.20935  
291 -> 301 0.24866  
293 -> 298 -0.12523  
293 -> 299 0.21564  
294 -> 301 -0.29503

Excited State 54: Singlet-EU 3.8944 eV 318.37 nm f=0.0022 <S\*\*2>=0.000

286 -> 301 -0.11708  
289 -> 298 0.36888  
289 -> 299 -0.27012  
290 -> 301 0.20935  
291 -> 300 -0.24866  
292 -> 298 -0.12523  
292 -> 299 -0.21564  
294 -> 300 -0.29503

Excited State 55: Singlet-EU 3.9041 eV 317.57 nm f=0.0234 <S\*\*2>=0.000

288 -> 298 -0.26353  
288 -> 299 -0.17791  
290 -> 300 0.16572  
291 -> 300 0.11568  
291 -> 301 0.50974  
293 -> 298 -0.11897  
293 -> 299 0.21487

Excited State 56: Singlet-EU 3.9041 eV 317.57 nm f=0.0234 <S\*\*2>=0.000

289 -> 298 0.26353  
289 -> 299 -0.17791  
290 -> 301 0.16572  
291 -> 300 0.50974  
291 -> 301 -0.11568  
292 -> 298 0.11897  
292 -> 299 0.21487

Excited State 57: Singlet-B2G 3.9175 eV 316.48 nm f=0.0000 <S\*\*2>=0.000

278 -> 297 0.16133  
279 -> 296 -0.16133  
286 -> 298 0.18139  
288 -> 300 -0.28111  
289 -> 301 -0.28111  
290 -> 299 0.47754  
295 -> 303 -0.10695

Excited state symmetry could not be determined.

Excited State 58: Singlet-?Sym 3.9562 eV 313.39 nm f=0.0000 <S\*\*2>=0.000

274 -> 297 -0.48482  
275 -> 296 0.48482  
280 -> 298 0.14295

Excited state symmetry could not be determined.

Excited State 59: Singlet-?Sym 3.9562 eV 313.39 nm f=0.0000 <S\*\*2>=0.000

278 -> 297 0.42545  
279 -> 296 0.42545  
290 -> 298 -0.29689  
295 -> 307 0.11591

Excited State 60: Singlet-A2U 3.9690 eV 312.38 nm f=0.0081 <S\*\*2>=0.000

281 -> 298 -0.23474  
283 -> 299 -0.27504  
284 -> 297 -0.26130  
284 -> 300 -0.24681  
285 -> 296 -0.26130  
285 -> 301 0.24681  
287 -> 298 0.30132

Excited State 61: Singlet-B2U 3.9731 eV 312.06 nm f=0.0000 <S\*\*2>=0.000

274 -> 296 0.21394  
275 -> 297 -0.21394  
281 -> 299 0.25500  
283 -> 298 0.27477  
284 -> 297 0.24107  
284 -> 300 0.24532  
285 -> 296 -0.24107  
285 -> 301 0.24532  
287 -> 299 -0.15614

Excited state symmetry could not be determined.

Excited State 62: Singlet-?Sym 3.9768 eV 311.77 nm f=0.0000 <S\*\*2>=0.000

274 -> 296 -0.44651  
275 -> 297 0.44651  
281 -> 299 0.10676  
283 -> 298 0.12222  
284 -> 297 0.11851  
284 -> 300 0.11071  
285 -> 296 -0.11851  
285 -> 301 0.11071  
287 -> 299 -0.12258

Excited State 63: Singlet-EG 3.9790 eV 311.60 nm f=0.0000 <S\*\*2>=0.000

281 -> 297 0.27122  
281 -> 300 0.25245  
283 -> 297 0.27192  
283 -> 300 0.27009  
284 -> 298 0.30705  
284 -> 299 0.30763



287 -> 300 -0.13431

Excited State 64: Singlet-EG 3.9790 eV 311.60 nm f=0.0000 <S\*\*2>=0.000

281 -> 296 -0.27122  
281 -> 301 0.25245  
283 -> 296 0.27192  
283 -> 301 -0.27009  
285 -> 298 -0.30705  
285 -> 299 0.30763  
287 -> 301 -0.13431

Excited state symmetry could not be determined.

Excited State 65: Singlet-?Sym 3.9856 eV 311.08 nm f=0.0000 <S\*\*2>=0.000

278 -> 296 0.48337  
279 -> 297 0.48337

Excited state symmetry could not be determined.

Excited State 66: Singlet-?Sym 3.9965 eV 310.24 nm f=0.0000 <S\*\*2>=0.000

278 -> 297 -0.41697  
279 -> 296 0.41697  
290 -> 299 0.13078  
295 -> 303 -0.33027

Excited state symmetry could not be determined.

Excited State 67: Singlet-?Sym 4.0004 eV 309.93 nm f=0.0015 <S\*\*2>=0.000

274 -> 296 0.45049  
275 -> 297 0.45049  
280 -> 302 -0.11330  
281 -> 298 -0.11983  
287 -> 298 -0.16863

Excited state symmetry could not be determined.

Excited State 68: Singlet-?Sym 4.0027 eV 309.75 nm f=0.0000 <S\*\*2>=0.000

278 -> 296 -0.48956  
279 -> 297 0.48956

Excited state symmetry could not be determined.

Excited State 69: Singlet-?Sym 4.0151 eV 308.80 nm f=0.0000 <S\*\*2>=0.000

274 -> 297 0.49441  
275 -> 296 0.49441

Excited State 70: Singlet-EU 4.0271 eV 307.87 nm f=0.0004 <S\*\*2>=0.000

277 -> 297 0.51192  
288 -> 298 -0.35341  
288 -> 299 0.29140

SavETr: write IOETrn= 770 NScale= 10 NData= 16 NLR=1 LETran= 1270.

Leave Link 914 at Sat Jul 19 07:03:43 2014, MaxMem= 2359296000 cpu: 1246107.6

(Enter /usr/local/g09/1601.exe)

Copying SCF densities to generalized density rwf, IOpCl= 0 IROHF=0.

## REFERENCES

1. R. Garner, G. V. Garner and H. Suschitzky, *J. Chem. Soc. C*, 1970, 825-829.
2. J. C. Hazelton, B. Iddon, H. Suschitzky and L. H. Woolley, *J. Chem. Soc., Perkin Trans. 1*, 1992, 685-691.
3. J. C. Hazelton, B. Iddon, H. Suschitzky and L. H. Woolley, *Tetrahedron*, 1995, **51**, 10771-10794.
4. H. W. Rothkopf, D. Wöhrle, R. Müller and G. Kossmehl, *Chem. Ber.*, 1975, **108**, 875-886.
5. O. W. Webster, D. R. Hartter, R. W. Begland, W. A. Sheppard and A. Cairncross, *J. Org. Chem.*, 1972, **37**, 4133-4136.
6. E. H. Mørkved, S. M. Neset, O. Bjørlo, H. Kjösen, G. Hvistendahl and F. Mo, *Acta Chem. Scand.*, 1995, **49**, 658-662.
7. M. Kostka, P. Zimcik, M. Miletin, P. Klemra, K. Kopecky and Z. Musil, *J. Photochem. Photobiol., A*, 2006, **178**, 16-25.
8. V. Novakova, P. Zimcik, M. Miletin, K. Kopecky and Z. Musil, *Eur. J. Org. Chem.*, 2010, **2010**, 732-739.
9. F. Ghani, J. Kristen and H. Riegler, *J. Chem. Eng. Data*, 2012, **57**, 439-449.
10. M. P. Donzello, G. De Mori, E. Viola, C. Ercolani, G. Ricciardi and A. Rosa, *Inorg. Chem.*, 2014, **53**, 8009-8019.
11. V. Novakova, M. Miletin, T. Filandrova, J. Lenčo, A. Růžicka and P. Zimcik, *J. Org. Chem.*, 2014, **79**, 2082-2093.
12. P. Zimcik, V. Novakova, K. Kopecky, M. Miletin, R. Z. Uslu Kobak, E. Svandrlíkova, L. Váchová and K. Lang, *Inorg. Chem.*, 2012, **51**, 4215-4223.
13. L. Kaestner, M. Cesson, K. Kassab, T. Christensen, P. D. Edminson, M. J. Cook, I. Chambrier and G. Jori, *Photochem. Photobiol. Sci.*, 2003, **2**, 660-667.
14. A. Ogunsipe, D. Maree and T. Nyokong, *J. Mol. Struct.*, 2003, **650**, 131-140.
15. V. V. Pavlishchuk and A. W. Addison, *Inorg. Chim. Acta*, 2000, **298**, 97-102.
16. A. D. Becke, *Phys. Rev. A*, 1988, **38**, 3098-3100.
17. C. T. Lee, W. T. Yang and R. G. Parr, *Phys. Rev. B*, 1988, **37**, 785-789.
18. A. D. Mclean and G. S. Chandler, *J. Chem. Phys.*, 1980, **72**, 5639-5648.
19. J. Tomasi, B. Mennucci and R. Cammi, *Chem. Rev.*, 2005, **105**, 2999-3093.
20. M. J. Frisch, G. W. Trucks, H. B. Schlegel, G. E. Scuseria, M. A. Robb, J. R. Cheeseman, G. Scalmani, V. Barone, B. Mennucci, G. A. Petersson, H. Nakatsuji, M. Caricato, X. Li, H. P. Hratchian, A. F. Izmaylov, J. Bloino, G. Zheng, J. L. Sonnenberg, M. Hada, M. Ehara, K. Toyota, R. Fukuda, J. Hasegawa, M. Ishida, T. Nakajima, Y. Honda, O. Kitao, H. Nakai, T. Vreven, J. A. Montgomery, Jr., J. E. Peralta, F. Ogliaro, M. Bearpark, J. J. Heyd, E. Brothers, K. N. Kudin, V. N. Staroverov, R. Kobayashi, J. Normand, K. Raghavachari, A. Rendell, J. C. Burant, S. S. Iyengar, J. Tomasi, M. Cossi, N. Rega, N. J. Millam, M. Klene, J. E. Knox, J. B. Cross, V. Bakken, C. Adamo, J. Jaramillo, R. Gomperts, R. E. Stratmann, O. Yazyev, A. J. Austin, R. Cammi, C. Pomelli, J. W. Ochterski, R. L. Martin, K. Morokuma, V. G. Zakrzewski, G. A. Voth, P. Salvador, J. J. Dannenberg, S. Dapprich, A. D. Daniels, O. Farkas, J. B. Foresman, J. V. Ortiz, J. Cioslowski and D. J. Fox, Gaussian 09, revision A.1, Gaussian, Inc.: Wallingford, CT, 2009.
21. A. L. Tenderholt, QMForge, version 2.1, Stanford University: Stanford, CA, 2011.
